# Supplementary material for: Correction of amblyopia in cats and mice after the critical period
Source: eLife. 2021 Aug 31;10:e70023. doi: 10.7554/eLife.70023 (PMC8456712; doi:10.7554/eLife.70023)
Supplement: Figure 1—source data 1. [file elife-70023-fig1-data1.xlsx]

## Sheet: contralateral eye
Animal ID	Time	VEP magnitude (uV)	Associated figure/table
G0008	baseline	256.518	Figs. 1C, E
N0019	baseline	293.365	Figs. 1C, E
N0020	baseline	218.314	Figs. 1C, E
N0021	baseline	230.415	Figs. 1C, E
H0010	baseline	139.339	Figs. 1C, E
K0015	baseline	235.452	Figs. 1C, E
K0016	baseline	234.094	Figs. 1C, E
K0017	baseline	195.767	Figs. 1C, E
G0008	1 hour post-TTX	51.2403	Figs. 1C, E
N0019	1 hour post-TTX	25.4708	Figs. 1C, E
N0020	1 hour post-TTX	23.4792	Figs. 1C, E
N0021	1 hour post-TTX	15.5833	Figs. 1C, E
H0010	1 hour post-TTX	16.7434	Figs. 1C, E
K0015	1 hour post-TTX	20.4862	Figs. 1C, E
K0016	1 hour post-TTX	22.9282	Figs. 1C, E
K0017	1 hour post-TTX	5.7606	Figs. 1C, E
G0008	1 day post-TTX	199.629	Figs. 1C, E
N0019	1 day post-TTX	441.362	Figs. 1C, E
N0020	1 day post-TTX	311.044	Figs. 1C, E
N0021	1 day post-TTX	369.94	Figs. 1C, E
H0010	1 day post-TTX	157.651	Figs. 1C, E
K0015	1 day post-TTX	193.068	Figs. 1C, E
K0016	1 day post-TTX	11.1662	Figs. 1C, E
K0017	1 day post-TTX	22.7847	Figs. 1C, E
G0008	2 days post-TTX	264.893	Figs. 1C, E
N0019	2 days post-TTX	456.487	Figs. 1C, E
N0020	2 days post-TTX	343.746	Figs. 1C, E
N0021	2 days post-TTX	308.111	Figs. 1C, E
H0010	2 days post-TTX	212.317	Figs. 1C, E
K0015	2 days post-TTX	221.306	Figs. 1C, E
K0016	2 days post-TTX	267.872	Figs. 1C, E
K0017	2 days post-TTX	62.2661	Figs. 1C, E
G0008	4 days post-TTX	304.446	Figs. 1C, E
N0019	4 days post-TTX	278.372	Figs. 1C, E
N0020	4 days post-TTX	190.77	Figs. 1C, E
N0021	4 days post-TTX	304.803	Figs. 1C, E
H0010	4 days post-TTX	217.055	Figs. 1C, E
K0015	4 days post-TTX	264.177	Figs. 1C, E
K0016	4 days post-TTX	366.147	Figs. 1C, E
K0017	4 days post-TTX	178.851	Figs. 1C, E
G0008	7 days post-TTX	210.874	Figs. 1C, E
N0019	7 days post-TTX	346.958	Figs. 1C, E
N0020	7 days post-TTX	277.789	Figs. 1C, E
N0021	7 days post-TTX	273.453	Figs. 1C, E
H0010	7 days post-TTX	85.0599	Figs. 1C, E
K0015	7 days post-TTX	229.824	Figs. 1C, E
K0016	7 days post-TTX	270.688	Figs. 1C, E
K0017	7 days post-TTX	112.344	Figs. 1C, E

## Sheet: ipsilateral eye
Animal ID	Time	VEP magnitude (uV)	Associated figure/table
G0008	baseline	99.55	Figs. 1D-E
N0019	baseline	168.039	Figs. 1D-E
N0020	baseline	142.39	Figs. 1D-E
N0021	baseline	60.8063	Figs. 1D-E
H0010	baseline	77.541	Figs. 1D-E
K0015	baseline	101.231	Figs. 1D-E
K0016	baseline	148.821	Figs. 1D-E
K0017	baseline	123.995	Figs. 1D-E
G0008	1 hour post-TTX	280.749	Figs. 1D-E
N0019	1 hour post-TTX	347.756	Figs. 1D-E
N0020	1 hour post-TTX	304.235	Figs. 1D-E
N0021	1 hour post-TTX	163.39	Figs. 1D-E
H0010	1 hour post-TTX	276.844	Figs. 1D-E
K0015	1 hour post-TTX	279.552	Figs. 1D-E
K0016	1 hour post-TTX	326.972	Figs. 1D-E
K0017	1 hour post-TTX	192.052	Figs. 1D-E
G0008	1 day post-TTX	544.556	Figs. 1D-E
N0019	1 day post-TTX	267.943	Figs. 1D-E
N0020	1 day post-TTX	270.637	Figs. 1D-E
N0021	1 day post-TTX	114.066	Figs. 1D-E
H0010	1 day post-TTX	193.489	Figs. 1D-E
K0015	1 day post-TTX	218.826	Figs. 1D-E
K0016	1 day post-TTX	257.875	Figs. 1D-E
K0017	1 day post-TTX	161.247	Figs. 1D-E
G0008	2 days post-TTX	148.074	Figs. 1D-E
N0019	2 days post-TTX	300.42	Figs. 1D-E
N0020	2 days post-TTX	207.569	Figs. 1D-E
N0021	2 days post-TTX	128.974	Figs. 1D-E
H0010	2 days post-TTX	176.045	Figs. 1D-E
K0015	2 days post-TTX	150.276	Figs. 1D-E
K0016	2 days post-TTX	261.275	Figs. 1D-E
K0017	2 days post-TTX	112.543	Figs. 1D-E
G0008	4 days post-TTX	227.305	Figs. 1D-E
N0019	4 days post-TTX	251.582	Figs. 1D-E
N0020	4 days post-TTX	189.682	Figs. 1D-E
N0021	4 days post-TTX	109.265	Figs. 1D-E
H0010	4 days post-TTX	203.394	Figs. 1D-E
K0015	4 days post-TTX	166.273	Figs. 1D-E
K0016	4 days post-TTX	192.987	Figs. 1D-E
K0017	4 days post-TTX	106.069	Figs. 1D-E
G0008	7 days post-TTX	152.081	Figs. 1D-E
N0019	7 days post-TTX	230.173	Figs. 1D-E
N0020	7 days post-TTX	192.03	Figs. 1D-E
N0021	7 days post-TTX	115.719	Figs. 1D-E
H0010	7 days post-TTX	135.792	Figs. 1D-E
K0015	7 days post-TTX	129.121	Figs. 1D-E
K0016	7 days post-TTX	203.621	Figs. 1D-E
K0017	7 days post-TTX	100.674	Figs. 1D-E
