# Supplementary material for: Correction of amblyopia in cats and mice after the critical period
Source: eLife. 2021 Aug 31;10:e70023. doi: 10.7554/eLife.70023 (PMC8456712; doi:10.7554/eLife.70023)
Supplement: Figure 2—source data 1. [file elife-70023-fig2-data1.xlsx]

## Sheet: contralateral eye
Animal ID	Postnatal age (days)	Treatment	Spatial frequency (cpd)	VEP magnitude (uV)	Associated figure/table
A0001	47	MD then TTX	0.05	79.4679	Fig. 2D, Table S1A
A0001	47	MD then TTX	0.2	142.727	Figs. 2B-D, Table S1A
A0001	47	MD then TTX	0.4	29.9438	Fig. 2D, Table S1A
A0001	54	MD then TTX	0.05	176.863	Table S1A
A0001	54	MD then TTX	0.2	182.343	Figs. 2B-C, Table S1A
A0001	54	MD then TTX	0.4	81.7396	Table S1A
A0001	61	MD then TTX	0.05	121.425	Table S1A
A0001	61	MD then TTX	0.2	218.762	Figs. 2B-C, Table S1A
A0001	61	MD then TTX	0.4	127.142	Table S1A
A0001	68	MD then TTX	0.05	220.765	Table S1A
A0001	68	MD then TTX	0.2	265.658	Figs. 2B-C, Table S1A
A0001	68	MD then TTX	0.4	95.8438	Table S1A
A0001	75	MD then TTX	0.05	88.1788	Fig. 2D, Table S1A
A0001	75	MD then TTX	0.2	114.272	Figs. 2B-D, Table S1A
A0001	75	MD then TTX	0.4	60.4807	Fig. 2D, Table S1A
A0004	47	sham then saline	0.05	193.064	Fig. 2D, Table S1A
A0004	47	sham then saline	0.2	245.408	Figs. 2B-D, Table S1A
A0004	47	sham then saline	0.4	229.75	Fig. 2D, Table S1A
A0004	54	sham then saline	0.05	196.51	Table S1A
A0004	54	sham then saline	0.2	256.568	Figs. 2B-C, Table S1A
A0004	54	sham then saline	0.4	185.412	Table S1A
A0004	61	sham then saline	0.05	173.545	Table S1A
A0004	61	sham then saline	0.2	214.175	Figs. 2B-C, Table S1A
A0004	61	sham then saline	0.4	86.8961	Table S1A
A0004	68	sham then saline	0.05	244.077	Table S1A
A0004	68	sham then saline	0.2	339.523	Figs. 2B-C, Table S1A
A0004	68	sham then saline	0.4	140.265	Table S1A
A0004	75	sham then saline	0.05	200.754	Fig. 2D, Table S1A
A0004	75	sham then saline	0.2	323.223	Figs. 2B-D, Table S1A
A0004	75	sham then saline	0.4	144.129	Fig. 2D, Table S1A
A0007	47	MD then TTX	0.05	78.353	Fig. 2D, Table S1A
A0007	47	MD then TTX	0.2	69.1483	Figs. 2B-D, Table S1A
A0007	47	MD then TTX	0.4	15.3588	Fig. 2D, Table S1A
A0007	54	MD then TTX	0.05	119.778	Table S1A
A0007	54	MD then TTX	0.2	198.671	Figs. 2B-C, Table S1A
A0007	54	MD then TTX	0.4	54.532	Table S1A
A0007	61	MD then TTX	0.05	99.7666	Table S1A
A0007	61	MD then TTX	0.2	186.403	Figs. 2B-C, Table S1A
A0007	61	MD then TTX	0.4	67.1519	Table S1A
A0007	68	MD then TTX	0.05	194.881	Table S1A
A0007	68	MD then TTX	0.2	240.898	Figs. 2B-C, Table S1A
A0007	68	MD then TTX	0.4	102.378	Table S1A
A0007	75	MD then TTX	0.05	147.477	Fig. 2D, Table S1A
A0007	75	MD then TTX	0.2	234.236	Figs. 2B-D, Table S1A
A0007	75	MD then TTX	0.4	94.5773	Fig. 2D, Table S1A
B0001	47	sham then saline	0.05	206.759	Fig. 2D, Table S1A
B0001	47	sham then saline	0.2	176.577	Figs. 2B-D, Table S1A
B0001	47	sham then saline	0.4	141.067	Fig. 2D, Table S1A
B0001	54	sham then saline	0.05	162.647	Table S1A
B0001	54	sham then saline	0.2	199.17	Figs. 2B-C, Table S1A
B0001	54	sham then saline	0.4	186.553	Table S1A
B0001	61	sham then saline	0.05	164.392	Table S1A
B0001	61	sham then saline	0.2	239.589	Figs. 2B-C, Table S1A
B0001	61	sham then saline	0.4	143.854	Table S1A
B0001	68	sham then saline	0.05	198.838	Table S1A
B0001	68	sham then saline	0.2	242.405	Figs. 2B-C, Table S1A
B0001	68	sham then saline	0.4	145.659	Table S1A
B0001	75	sham then saline	0.05	144.567	Fig. 2D, Table S1A
B0001	75	sham then saline	0.2	215.575	Figs. 2B-D, Table S1A
B0001	75	sham then saline	0.4	166.291	Fig. 2D, Table S1A
B0002	47	MD then TTX	0.05	93.8561	Fig. 2D, Table S1A
B0002	47	MD then TTX	0.2	23.9113	Figs. 2B-D, Table S1A
B0002	47	MD then TTX	0.4	27.4452	Fig. 2D, Table S1A
B0002	54	MD then TTX	0.05	290.084	Table S1A
B0002	54	MD then TTX	0.2	337.874	Figs. 2B-C, Table S1A
B0002	54	MD then TTX	0.4	209.282	Table S1A
B0002	61	MD then TTX	0.05	322.699	Table S1A
B0002	61	MD then TTX	0.2	412.7	Figs. 2B-C, Table S1A
B0002	61	MD then TTX	0.4	226.631	Table S1A
B0002	68	MD then TTX	0.05	299.76	Table S1A
B0002	68	MD then TTX	0.2	375.475	Figs. 2B-C, Table S1A
B0002	68	MD then TTX	0.4	254.806	Table S1A
B0002	75	MD then TTX	0.05	312.765	Fig. 2D, Table S1A
B0002	75	MD then TTX	0.2	325.741	Figs. 2B-D, Table S1A
B0002	75	MD then TTX	0.4	271.661	Fig. 2D, Table S1A
B0003	47	MD then saline	0.05	68.4764	Fig. 2D, Table S1A
B0003	47	MD then saline	0.2	33.0889	Figs. 2B-D, Table S1A
B0003	47	MD then saline	0.4	26.8014	Fig. 2D, Table S1A
B0003	54	MD then saline	0.05	105.512	Table S1A
B0003	54	MD then saline	0.2	120.738	Figs. 2B-C, Table S1A
B0003	54	MD then saline	0.4	33.9722	Table S1A
B0003	61	MD then saline	0.05	90.9529	Table S1A
B0003	61	MD then saline	0.2	99.743	Figs. 2B-C, Table S1A
B0003	61	MD then saline	0.4	19.1709	Table S1A
B0003	68	MD then saline	0.05	136.12	Table S1A
B0003	68	MD then saline	0.2	79.6134	Figs. 2B-C, Table S1A
B0003	68	MD then saline	0.4	13.2018	Table S1A
B0003	75	MD then saline	0.05	138.313	Fig. 2D, Table S1A
B0003	75	MD then saline	0.2	106.518	Figs. 2B-D, Table S1A
B0003	75	MD then saline	0.4	33.7877	Fig. 2D, Table S1A
B0004	47	MD then TTX	0.05	28.5977	Fig. 2D, Table S1A
B0004	47	MD then TTX	0.2	22.0755	Figs. 2B-D, Table S1A
B0004	47	MD then TTX	0.4	11.5278	Fig. 2D, Table S1A
B0004	54	MD then TTX	0.05	59.5499	Table S1A
B0004	54	MD then TTX	0.2	72.1592	Figs. 2B-C, Table S1A
B0004	54	MD then TTX	0.4	41.3856	Table S1A
B0004	61	MD then TTX	0.05	53.417	Table S1A
B0004	61	MD then TTX	0.2	58.9168	Figs. 2B-C, Table S1A
B0004	61	MD then TTX	0.4	20.4386	Table S1A
B0004	68	MD then TTX	0.05	62.3497	Table S1A
B0004	68	MD then TTX	0.2	71.1918	Figs. 2B-C, Table S1A
B0004	68	MD then TTX	0.4	41.9103	Table S1A
B0004	75	MD then TTX	0.05	56.172	Fig. 2D, Table S1A
B0004	75	MD then TTX	0.2	90.1105	Figs. 2B-D, Table S1A
B0004	75	MD then TTX	0.4	45.6428	Fig. 2D, Table S1A
E0569	47	sham then saline	0.05	128.985	Fig. 2D, Table S1A
E0569	47	sham then saline	0.2	136.448	Figs. 2B-D, Table S1A
E0569	47	sham then saline	0.4	126.179	Fig. 2D, Table S1A
E0569	54	sham then saline	0.05	118.126	Table S1A
E0569	54	sham then saline	0.2	162.723	Figs. 2B-C, Table S1A
E0569	54	sham then saline	0.4	64.5701	Table S1A
E0569	61	sham then saline	0.05	122.433	Table S1A
E0569	61	sham then saline	0.2	134.344	Figs. 2B-C, Table S1A
E0569	61	sham then saline	0.4	68.6155	Table S1A
E0569	68	sham then saline	0.05	53.4526	Table S1A
E0569	68	sham then saline	0.2	161.938	Figs. 2B-C, Table S1A
E0569	68	sham then saline	0.4	106.348	Table S1A
E0569	75	sham then saline	0.05	143.515	Fig. 2D, Table S1A
E0569	75	sham then saline	0.2	188.773	Figs. 2B-D, Table S1A
E0569	75	sham then saline	0.4	77.4629	Fig. 2D, Table S1A
E0570	47	MD then TTX	0.05	70.8623	Fig. 2D, Table S1A
E0570	47	MD then TTX	0.2	62.2911	Figs. 2B-D, Table S1A
E0570	47	MD then TTX	0.4	28.776	Fig. 2D, Table S1A
E0570	54	MD then TTX	0.05	78.5504	Table S1A
E0570	54	MD then TTX	0.2	145.048	Figs. 2B-C, Table S1A
E0570	54	MD then TTX	0.4	103.402	Table S1A
E0570	61	MD then TTX	0.05	187.089	Table S1A
E0570	61	MD then TTX	0.2	196.51	Figs. 2B-C, Table S1A
E0570	61	MD then TTX	0.4	147.185	Table S1A
E0570	68	MD then TTX	0.05	77.7319	Table S1A
E0570	68	MD then TTX	0.2	200.567	Figs. 2B-C, Table S1A
E0570	68	MD then TTX	0.4	86.0667	Table S1A
E0570	75	MD then TTX	0.05	118.245	Fig. 2D, Table S1A
E0570	75	MD then TTX	0.2	145.166	Figs. 2B-D, Table S1A
E0570	75	MD then TTX	0.4	121.14	Fig. 2D, Table S1A
E0571	47	MD then saline	0.05	29.4259	Fig. 2D, Table S1A
E0571	47	MD then saline	0.2	16.7198	Figs. 2B-D, Table S1A
E0571	47	MD then saline	0.4	17.6198	Fig. 2D, Table S1A
E0571	54	MD then saline	0.05	9.6808	Table S1A
E0571	54	MD then saline	0.2	13.3901	Figs. 2B-C, Table S1A
E0571	54	MD then saline	0.4	10.2891	Table S1A
E0571	61	MD then saline	0.05	71.1885	Table S1A
E0571	61	MD then saline	0.2	50.8524	Figs. 2B-C, Table S1A
E0571	61	MD then saline	0.4	24.9514	Table S1A
E0571	68	MD then saline	0.05	72.1152	Table S1A
E0571	68	MD then saline	0.2	62.4871	Figs. 2B-C, Table S1A
E0571	68	MD then saline	0.4	14.3688	Table S1A
E0571	75	MD then saline	0.05	71.0593	Fig. 2D, Table S1A
E0571	75	MD then saline	0.2	62.6163	Figs. 2B-D, Table S1A
E0571	75	MD then saline	0.4	25.7087	Fig. 2D, Table S1A
E0575	47	MD then TTX	0.05	73.4169	Fig. 2D, Table S1A
E0575	47	MD then TTX	0.2	32.094	Figs. 2B-D, Table S1A
E0575	47	MD then TTX	0.4	10.3508	Fig. 2D, Table S1A
E0575	54	MD then TTX	0.05	121.52	Table S1A
E0575	54	MD then TTX	0.2	87.3596	Figs. 2B-C, Table S1A
E0575	54	MD then TTX	0.4	15.0612	Table S1A
E0575	61	MD then TTX	0.05	189.658	Table S1A
E0575	61	MD then TTX	0.2	167.89	Figs. 2B-C, Table S1A
E0575	61	MD then TTX	0.4	86.7429	Table S1A
E0575	68	MD then TTX	0.05	132.394	Table S1A
E0575	68	MD then TTX	0.2	148.46	Figs. 2B-C, Table S1A
E0575	68	MD then TTX	0.4	40.9275	Table S1A
E0575	75	MD then TTX	0.05	183.117	Fig. 2D, Table S1A
E0575	75	MD then TTX	0.2	145.738	Figs. 2B-D, Table S1A
E0575	75	MD then TTX	0.4	85.7466	Fig. 2D, Table S1A
E0576	47	sham then saline	0.05	253.088	Fig. 2D, Table S1A
E0576	47	sham then saline	0.2	199.288	Figs. 2B-D, Table S1A
E0576	47	sham then saline	0.4	115.821	Fig. 2D, Table S1A
E0576	54	sham then saline	0.05	271.798	Table S1A
E0576	54	sham then saline	0.2	127.27	Figs. 2B-C, Table S1A
E0576	54	sham then saline	0.4	84.6228	Table S1A
E0576	61	sham then saline	0.05	327.186	Table S1A
E0576	61	sham then saline	0.2	153.444	Figs. 2B-C, Table S1A
E0576	61	sham then saline	0.4	86.1729	Table S1A
E0576	68	sham then saline	0.05	200.966	Table S1A
E0576	68	sham then saline	0.2	132.119	Figs. 2B-C, Table S1A
E0576	68	sham then saline	0.4	48.7805	Table S1A
E0576	75	sham then saline	0.05	281.307	Fig. 2D, Table S1A
E0576	75	sham then saline	0.2	194.648	Figs. 2B-D, Table S1A
E0576	75	sham then saline	0.4	80.576	Fig. 2D, Table S1A
E0577	47	MD then saline	0.05	136.888	Fig. 2D, Table S1A
E0577	47	MD then saline	0.2	158.151	Figs. 2B-D, Table S1A
E0577	47	MD then saline	0.4	58.6813	Fig. 2D, Table S1A
E0577	54	MD then saline	0.05	220.216	Table S1A
E0577	54	MD then saline	0.2	181.909	Figs. 2B-C, Table S1A
E0577	54	MD then saline	0.4	131.812	Table S1A
E0577	61	MD then saline	0.05	200.197	Table S1A
E0577	61	MD then saline	0.2	259.804	Figs. 2B-C, Table S1A
E0577	61	MD then saline	0.4	174.539	Table S1A
E0577	68	MD then saline	0.05	111.372	Table S1A
E0577	68	MD then saline	0.2	151.114	Figs. 2B-C, Table S1A
E0577	68	MD then saline	0.4	94.0219	Table S1A
E0577	75	MD then saline	0.05	120.942	Fig. 2D, Table S1A
E0577	75	MD then saline	0.2	136.896	Figs. 2B-D, Table S1A
E0577	75	MD then saline	0.4	124.537	Fig. 2D, Table S1A
L2554	47	MD then saline	0.05	139.725	Fig. 2D, Table S1A
L2554	47	MD then saline	0.2	169.588	Figs. 2B-D, Table S1A
L2554	47	MD then saline	0.4	30.7439	Fig. 2D, Table S1A
L2554	54	MD then saline	0.05	65.4435	Table S1A
L2554	54	MD then saline	0.2	87.1562	Figs. 2B-C, Table S1A
L2554	54	MD then saline	0.4	66.8849	Table S1A
L2554	61	MD then saline	0.05	76.4565	Table S1A
L2554	61	MD then saline	0.2	106.411	Figs. 2B-C, Table S1A
L2554	61	MD then saline	0.4	50.8737	Table S1A
L2554	68	MD then saline	0.05	74.3757	Table S1A
L2554	68	MD then saline	0.2	96.8861	Figs. 2B-C, Table S1A
L2554	68	MD then saline	0.4	53.1704	Table S1A
L2554	75	MD then saline	0.05	78.3783	Fig. 2D, Table S1A
L2554	75	MD then saline	0.2	112.218	Figs. 2B-D, Table S1A
L2554	75	MD then saline	0.4	74.9019	Fig. 2D, Table S1A
L2559	47	MD then TTX	0.05	116.284	Fig. 2D, Table S1A
L2559	47	MD then TTX	0.2	69.2549	Figs. 2B-D, Table S1A
L2559	47	MD then TTX	0.4	94.184	Fig. 2D, Table S1A
L2559	54	MD then TTX	0.05	152.211	Table S1A
L2559	54	MD then TTX	0.2	218.017	Figs. 2B-C, Table S1A
L2559	54	MD then TTX	0.4	128.333	Table S1A
L2559	61	MD then TTX	0.05	171.039	Table S1A
L2559	61	MD then TTX	0.2	232.708	Figs. 2B-C, Table S1A
L2559	61	MD then TTX	0.4	214.64	Table S1A
L2559	68	MD then TTX	0.05	118.878	Table S1A
L2559	68	MD then TTX	0.2	198.812	Figs. 2B-C, Table S1A
L2559	68	MD then TTX	0.4	143.905	Table S1A
L2559	75	MD then TTX	0.05	185.518	Fig. 2D, Table S1A
L2559	75	MD then TTX	0.2	232.294	Figs. 2B-D, Table S1A
L2559	75	MD then TTX	0.4	171.712	Fig. 2D, Table S1A
M6334	47	sham then saline	0.05	299.018	Fig. 2D, Table S1A
M6334	47	sham then saline	0.2	319.808	Figs. 2B-D, Table S1A
M6334	47	sham then saline	0.4	213.015	Fig. 2D, Table S1A
M6334	54	sham then saline	0.05	320.377	Table S1A
M6334	54	sham then saline	0.2	264.383	Figs. 2B-C, Table S1A
M6334	54	sham then saline	0.4	151.481	Table S1A
M6334	61	sham then saline	0.05	381.625	Table S1A
M6334	61	sham then saline	0.2	307.314	Figs. 2B-C, Table S1A
M6334	61	sham then saline	0.4	227.236	Table S1A
M6334	68	sham then saline	0.05	250.564	Table S1A
M6334	68	sham then saline	0.2	309.637	Figs. 2B-C, Table S1A
M6334	68	sham then saline	0.4	216.687	Table S1A
M6334	75	sham then saline	0.05	259.455	Fig. 2D, Table S1A
M6334	75	sham then saline	0.2	303.59	Figs. 2B-D, Table S1A
M6334	75	sham then saline	0.4	155.604	Fig. 2D, Table S1A
M6335	47	MD then TTX	0.05	147.249	Fig. 2D, Table S1A
M6335	47	MD then TTX	0.2	209.412	Figs. 2B-D, Table S1A
M6335	47	MD then TTX	0.4	50.565	Fig. 2D, Table S1A
M6335	54	MD then TTX	0.05	152.81	Table S1A
M6335	54	MD then TTX	0.2	202.958	Figs. 2B-C, Table S1A
M6335	54	MD then TTX	0.4	94.3484	Table S1A
M6335	61	MD then TTX	0.05	147.742	Table S1A
M6335	61	MD then TTX	0.2	205.807	Figs. 2B-C, Table S1A
M6335	61	MD then TTX	0.4	82.9915	Table S1A
M6335	68	MD then TTX	0.05	128.138	Table S1A
M6335	68	MD then TTX	0.2	210.408	Figs. 2B-C, Table S1A
M6335	68	MD then TTX	0.4	99.8492	Table S1A
M6335	75	MD then TTX	0.05	179.766	Fig. 2D, Table S1A
M6335	75	MD then TTX	0.2	259.75	Figs. 2B-D, Table S1A
M6335	75	MD then TTX	0.4	95.8422	Fig. 2D, Table S1A
U4490	47	MD then saline	0.05	92.7461	Fig. 2D, Table S1A
U4490	47	MD then saline	0.2	80.2226	Figs. 2B-D, Table S1A
U4490	47	MD then saline	0.4	48.9396	Fig. 2D, Table S1A
U4490	54	MD then saline	0.05	77.961	Table S1A
U4490	54	MD then saline	0.2	78.0674	Figs. 2B-C, Table S1A
U4490	54	MD then saline	0.4	51.3343	Table S1A
U4490	61	MD then saline	0.05	90.2349	Table S1A
U4490	61	MD then saline	0.2	80.2836	Figs. 2B-C, Table S1A
U4490	61	MD then saline	0.4	95.8934	Table S1A
U4490	68	MD then saline	0.05	53.2923	Table S1A
U4490	68	MD then saline	0.2	83.1737	Figs. 2B-C, Table S1A
U4490	68	MD then saline	0.4	66.8277	Table S1A
U4490	75	MD then saline	0.05	79.953	Fig. 2D, Table S1A
U4490	75	MD then saline	0.2	68.2186	Figs. 2B-D, Table S1A
U4490	75	MD then saline	0.4	60.273	Fig. 2D, Table S1A
U4493	47	sham then saline	0.05	191.352	Fig. 2D, Table S1A
U4493	47	sham then saline	0.2	204.559	Figs. 2B-D, Table S1A
U4493	47	sham then saline	0.4	65.9665	Fig. 2D, Table S1A
U4493	54	sham then saline	0.05	156.934	Table S1A
U4493	54	sham then saline	0.2	157.94	Figs. 2B-C, Table S1A
U4493	54	sham then saline	0.4	50.8827	Table S1A
U4493	61	sham then saline	0.05	203.912	Table S1A
U4493	61	sham then saline	0.2	210.64	Figs. 2B-C, Table S1A
U4493	61	sham then saline	0.4	105.092	Table S1A
U4493	68	sham then saline	0.05	219.025	Table S1A
U4493	68	sham then saline	0.2	189.664	Figs. 2B-C, Table S1A
U4493	68	sham then saline	0.4	79.0428	Table S1A
U4493	75	sham then saline	0.05	148.945	Fig. 2D, Table S1A
U4493	75	sham then saline	0.2	170.766	Figs. 2B-D, Table S1A
U4493	75	sham then saline	0.4	92.5726	Fig. 2D, Table S1A
U4494	47	MD then TTX	0.05	42.4167	Fig. 2D, Table S1A
U4494	47	MD then TTX	0.2	58.4644	Figs. 2B-D, Table S1A
U4494	47	MD then TTX	0.4	11.958	Fig. 2D, Table S1A
U4494	54	MD then TTX	0.05	66.4608	Table S1A
U4494	54	MD then TTX	0.2	76.0371	Figs. 2B-C, Table S1A
U4494	54	MD then TTX	0.4	33.2404	Table S1A
U4494	61	MD then TTX	0.05	127.391	Table S1A
U4494	61	MD then TTX	0.2	90.1281	Figs. 2B-C, Table S1A
U4494	61	MD then TTX	0.4	20.304	Table S1A
U4494	68	MD then TTX	0.05	68.5219	Table S1A
U4494	68	MD then TTX	0.2	106.429	Figs. 2B-C, Table S1A
U4494	68	MD then TTX	0.4	31.5192	Table S1A
U4494	75	MD then TTX	0.05	78.5101	Fig. 2D, Table S1A
U4494	75	MD then TTX	0.2	94.4425	Figs. 2B-D, Table S1A
U4494	75	MD then TTX	0.4	45.4399	Fig. 2D, Table S1A
U4497	47	sham then saline	0.05	219.52	Fig. 2D, Table S1A
U4497	47	sham then saline	0.2	223.4	Figs. 2B-D, Table S1A
U4497	47	sham then saline	0.4	117.998	Fig. 2D, Table S1A
U4497	54	sham then saline	0.05	168.568	Table S1A
U4497	54	sham then saline	0.2	174.57	Figs. 2B-C, Table S1A
U4497	54	sham then saline	0.4	122.732	Table S1A
U4497	61	sham then saline	0.05	186.702	Table S1A
U4497	61	sham then saline	0.2	166.987	Figs. 2B-C, Table S1A
U4497	61	sham then saline	0.4	148.772	Table S1A
U4497	68	sham then saline	0.05	152.003	Table S1A
U4497	68	sham then saline	0.2	155.624	Figs. 2B-C, Table S1A
U4497	68	sham then saline	0.4	115.779	Table S1A
U4497	75	sham then saline	0.05	177.58	Fig. 2D, Table S1A
U4497	75	sham then saline	0.2	115.658	Figs. 2B-D, Table S1A
U4497	75	sham then saline	0.4	119.115	Fig. 2D, Table S1A
U6682	47	sham then saline	0.05	264.344	Fig. 2D, Table S1A
U6682	47	sham then saline	0.2	256.39	Figs. 2B-D, Table S1A
U6682	47	sham then saline	0.4	148.679	Fig. 2D, Table S1A
U6682	54	sham then saline	0.05	227.695	Table S1A
U6682	54	sham then saline	0.2	253.988	Figs. 2B-C, Table S1A
U6682	54	sham then saline	0.4	127.792	Table S1A
U6682	61	sham then saline	0.05	155.972	Table S1A
U6682	61	sham then saline	0.2	172.169	Figs. 2B-C, Table S1A
U6682	61	sham then saline	0.4	74.9925	Table S1A
U6682	68	sham then saline	0.05	209.8	Table S1A
U6682	68	sham then saline	0.2	172.111	Figs. 2B-C, Table S1A
U6682	68	sham then saline	0.4	111.247	Table S1A
U6682	75	sham then saline	0.05	165.642	Fig. 2D, Table S1A
U6682	75	sham then saline	0.2	193.955	Figs. 2B-D, Table S1A
U6682	75	sham then saline	0.4	106.763	Fig. 2D, Table S1A
U6685	47	sham then saline	0.05	89.2865	Fig. 2D, Table S1A
U6685	47	sham then saline	0.2	96.8764	Figs. 2B-D, Table S1A
U6685	47	sham then saline	0.4	75.7329	Fig. 2D, Table S1A
U6685	54	sham then saline	0.05	92.2107	Table S1A
U6685	54	sham then saline	0.2	145.42	Figs. 2B-C, Table S1A
U6685	54	sham then saline	0.4	67.4271	Table S1A
U6685	61	sham then saline	0.05	92.0285	Table S1A
U6685	61	sham then saline	0.2	140.987	Figs. 2B-C, Table S1A
U6685	61	sham then saline	0.4	61.7267	Table S1A
U6685	68	sham then saline	0.05	81.6786	Table S1A
U6685	68	sham then saline	0.2	141.293	Figs. 2B-C, Table S1A
U6685	68	sham then saline	0.4	78.8381	Table S1A
U6685	75	sham then saline	0.05	79.6438	Fig. 2D, Table S1A
U6685	75	sham then saline	0.2	140.048	Figs. 2B-D, Table S1A
U6685	75	sham then saline	0.4	74.8691	Fig. 2D, Table S1A
U6686	47	MD then saline	0.05	91.8477	Fig. 2D, Table S1A
U6686	47	MD then saline	0.2	31.1412	Figs. 2B-D, Table S1A
U6686	47	MD then saline	0.4	35.5154	Fig. 2D, Table S1A
U6686	54	MD then saline	0.05	133.122	Table S1A
U6686	54	MD then saline	0.2	30.5397	Figs. 2B-C, Table S1A
U6686	54	MD then saline	0.4	30.7764	Table S1A
U6686	61	MD then saline	0.05	110.145	Table S1A
U6686	61	MD then saline	0.2	78.684	Figs. 2B-C, Table S1A
U6686	61	MD then saline	0.4	36.147	Table S1A
U6686	68	MD then saline	0.05	85.0364	Table S1A
U6686	68	MD then saline	0.2	59.2644	Figs. 2B-C, Table S1A
U6686	68	MD then saline	0.4	35.5016	Table S1A
U6686	75	MD then saline	0.05	80.7183	Fig. 2D, Table S1A
U6686	75	MD then saline	0.2	80.1776	Figs. 2B-D, Table S1A
U6686	75	MD then saline	0.4	2.96887	Fig. 2D, Table S1A
U6689	47	sham then saline	0.05	101.392	Fig. 2D, Table S1A
U6689	47	sham then saline	0.2	129.307	Figs. 2B-D, Table S1A
U6689	47	sham then saline	0.4	76.0301	Fig. 2D, Table S1A
U6689	54	sham then saline	0.05	88.9578	Table S1A
U6689	54	sham then saline	0.2	111.753	Figs. 2B-C, Table S1A
U6689	54	sham then saline	0.4	69.1509	Table S1A
U6689	61	sham then saline	0.05	147.599	Table S1A
U6689	61	sham then saline	0.2	156.198	Figs. 2B-C, Table S1A
U6689	61	sham then saline	0.4	92.5707	Table S1A
U6689	68	sham then saline	0.05	160.853	Table S1A
U6689	68	sham then saline	0.2	186.962	Figs. 2B-C, Table S1A
U6689	68	sham then saline	0.4	59.2075	Table S1A
U6689	75	sham then saline	0.05	178.029	Fig. 2D, Table S1A
U6689	75	sham then saline	0.2	194.826	Figs. 2B-D, Table S1A
U6689	75	sham then saline	0.4	155.186	Fig. 2D, Table S1A
U6690	47	MD then TTX	0.05	52.8174	Fig. 2D, Table S1A
U6690	47	MD then TTX	0.2	44.9661	Figs. 2B-D, Table S1A
U6690	47	MD then TTX	0.4	11.7928	Fig. 2D, Table S1A
U6690	54	MD then TTX	0.05	114.646	Table S1A
U6690	54	MD then TTX	0.2	124.341	Figs. 2B-C, Table S1A
U6690	54	MD then TTX	0.4	62.9813	Table S1A
U6690	61	MD then TTX	0.05	131.216	Table S1A
U6690	61	MD then TTX	0.2	135.629	Figs. 2B-C, Table S1A
U6690	61	MD then TTX	0.4	124.463	Table S1A
U6690	68	MD then TTX	0.05	142.313	Table S1A
U6690	68	MD then TTX	0.2	181.597	Figs. 2B-C, Table S1A
U6690	68	MD then TTX	0.4	112.881	Table S1A
U6690	75	MD then TTX	0.05	109.903	Fig. 2D, Table S1A
U6690	75	MD then TTX	0.2	171.043	Figs. 2B-D, Table S1A
U6690	75	MD then TTX	0.4	130.791	Fig. 2D, Table S1A
V4480	47	MD then saline	0.05	66.9	Fig. 2D, Table S1A
V4480	47	MD then saline	0.2	14.8817	Figs. 2B-D, Table S1A
V4480	47	MD then saline	0.4	6.36694	Fig. 2D, Table S1A
V4480	54	MD then saline	0.05	124.129	Table S1A
V4480	54	MD then saline	0.2	80.3395	Figs. 2B-C, Table S1A
V4480	54	MD then saline	0.4	63.5456	Table S1A
V4480	61	MD then saline	0.05	123.686	Table S1A
V4480	61	MD then saline	0.2	82.6061	Figs. 2B-C, Table S1A
V4480	61	MD then saline	0.4	54.0745	Table S1A
V4480	68	MD then saline	0.05	66.9689	Table S1A
V4480	68	MD then saline	0.2	96.0018	Figs. 2B-C, Table S1A
V4480	68	MD then saline	0.4	55.1903	Table S1A
V4480	75	MD then saline	0.05	14.5201	Fig. 2D, Table S1A
V4480	75	MD then saline	0.2	13.7729	Figs. 2B-D, Table S1A
V4480	75	MD then saline	0.4	15.2641	Fig. 2D, Table S1A
V4483	47	sham then saline	0.05	136.898	Fig. 2D, Table S1A
V4483	47	sham then saline	0.2	139.474	Figs. 2B-D, Table S1A
V4483	47	sham then saline	0.4	71.5841	Fig. 2D, Table S1A
V4483	54	sham then saline	0.05	76.3079	Table S1A
V4483	54	sham then saline	0.2	133.48	Figs. 2B-C, Table S1A
V4483	54	sham then saline	0.4	92.7607	Table S1A
V4483	61	sham then saline	0.05	118.122	Table S1A
V4483	61	sham then saline	0.2	155.072	Figs. 2B-C, Table S1A
V4483	61	sham then saline	0.4	82.971	Table S1A
V4483	68	sham then saline	0.05	142.694	Table S1A
V4483	68	sham then saline	0.2	163.705	Figs. 2B-C, Table S1A
V4483	68	sham then saline	0.4	93.1276	Table S1A
V4483	75	sham then saline	0.05	97.3335	Fig. 2D, Table S1A
V4483	75	sham then saline	0.2	145.336	Figs. 2B-D, Table S1A
V4483	75	sham then saline	0.4	104.829	Fig. 2D, Table S1A
X4542	47	MD then saline	0.05	165.646	Fig. 2D, Table S1A
X4542	47	MD then saline	0.2	218.456	Figs. 2B-D, Table S1A
X4542	47	MD then saline	0.4	101.572	Fig. 2D, Table S1A
X4542	54	MD then saline	0.05	167.752	Table S1A
X4542	54	MD then saline	0.2	185.071	Figs. 2B-C, Table S1A
X4542	54	MD then saline	0.4	105.587	Table S1A
X4542	61	MD then saline	0.05	140.304	Table S1A
X4542	61	MD then saline	0.2	93.9716	Figs. 2B-C, Table S1A
X4542	61	MD then saline	0.4	24.5344	Table S1A
X4542	68	MD then saline	0.05	21.6908	Table S1A
X4542	68	MD then saline	0.2	33.8853	Figs. 2B-C, Table S1A
X4542	68	MD then saline	0.4	18.5385	Table S1A
X4542	75	MD then saline	0.05	14.3211	Fig. 2D, Table S1A
X4542	75	MD then saline	0.2	16.9955	Figs. 2B-D, Table S1A
X4542	75	MD then saline	0.4	8.46587	Fig. 2D, Table S1A
X4545	47	MD then TTX	0.05	114.976	Fig. 2D, Table S1A
X4545	47	MD then TTX	0.2	100.649	Figs. 2B-D, Table S1A
X4545	47	MD then TTX	0.4	26.978	Fig. 2D, Table S1A
X4545	54	MD then TTX	0.05	225.23	Table S1A
X4545	54	MD then TTX	0.2	173.85	Figs. 2B-C, Table S1A
X4545	54	MD then TTX	0.4	33.6791	Table S1A
X4545	61	MD then TTX	0.05	210.19	Table S1A
X4545	61	MD then TTX	0.2	226.992	Figs. 2B-C, Table S1A
X4545	61	MD then TTX	0.4	65.1637	Table S1A
X4545	68	MD then TTX	0.05	242.421	Table S1A
X4545	68	MD then TTX	0.2	232.719	Figs. 2B-C, Table S1A
X4545	68	MD then TTX	0.4	74.9822	Table S1A
X4545	75	MD then TTX	0.05	223.966	Fig. 2D, Table S1A
X4545	75	MD then TTX	0.2	254.957	Figs. 2B-D, Table S1A
X4545	75	MD then TTX	0.4	111.621	Fig. 2D, Table S1A
X4546	47	MD then saline	0.05	115.977	Fig. 2D, Table S1A
X4546	47	MD then saline	0.2	25.5438	Figs. 2B-D, Table S1A
X4546	47	MD then saline	0.4	50.8532	Fig. 2D, Table S1A
X4546	54	MD then saline	0.05	221.621	Table S1A
X4546	54	MD then saline	0.2	156.211	Figs. 2B-C, Table S1A
X4546	54	MD then saline	0.4	104.614	Table S1A
X4546	61	MD then saline	0.05	154.672	Table S1A
X4546	61	MD then saline	0.2	146.049	Figs. 2B-C, Table S1A
X4546	61	MD then saline	0.4	120.986	Table S1A
X4546	68	MD then saline	0.05	101.802	Table S1A
X4546	68	MD then saline	0.2	127.367	Figs. 2B-C, Table S1A
X4546	68	MD then saline	0.4	92.6317	Table S1A
X4546	75	MD then saline	0.05	145.428	Fig. 2D, Table S1A
X4546	75	MD then saline	0.2	137.911	Figs. 2B-D, Table S1A
X4546	75	MD then saline	0.4	67.0397	Fig. 2D, Table S1A
X4547	47	sham then saline	0.05	208.465	Fig. 2D, Table S1A
X4547	47	sham then saline	0.2	192.138	Figs. 2B-D, Table S1A
X4547	47	sham then saline	0.4	53.0899	Fig. 2D, Table S1A
X4547	54	sham then saline	0.05	274.592	Table S1A
X4547	54	sham then saline	0.2	227.788	Figs. 2B-C, Table S1A
X4547	54	sham then saline	0.4	206.117	Table S1A
X4547	61	sham then saline	0.05	183.803	Table S1A
X4547	61	sham then saline	0.2	191.217	Figs. 2B-C, Table S1A
X4547	61	sham then saline	0.4	102.013	Table S1A
X4547	68	sham then saline	0.05	138.598	Table S1A
X4547	68	sham then saline	0.2	125.105	Figs. 2B-C, Table S1A
X4547	68	sham then saline	0.4	69.7471	Table S1A
X4547	75	sham then saline	0.05	112.951	Fig. 2D, Table S1A
X4547	75	sham then saline	0.2	108.226	Figs. 2B-D, Table S1A
X4547	75	sham then saline	0.4	74.0188	Fig. 2D, Table S1A
X4548	47	sham then saline	0.05	114.775	Fig. 2D, Table S1A
X4548	47	sham then saline	0.2	179.773	Figs. 2B-D, Table S1A
X4548	47	sham then saline	0.4	31.8792	Fig. 2D, Table S1A
X4548	54	sham then saline	0.05	120.476	Table S1A
X4548	54	sham then saline	0.2	119.253	Figs. 2B-C, Table S1A
X4548	54	sham then saline	0.4	54.7444	Table S1A
X4548	61	sham then saline	0.05	85.2328	Table S1A
X4548	61	sham then saline	0.2	140.262	Figs. 2B-C, Table S1A
X4548	61	sham then saline	0.4	51.599	Table S1A
X4548	68	sham then saline	0.05	67.1892	Table S1A
X4548	68	sham then saline	0.2	180.52	Figs. 2B-C, Table S1A
X4548	68	sham then saline	0.4	60.3722	Table S1A
X4548	75	sham then saline	0.05	132.858	Fig. 2D, Table S1A
X4548	75	sham then saline	0.2	215.799	Figs. 2B-D, Table S1A
X4548	75	sham then saline	0.4	91.7922	Fig. 2D, Table S1A
Y9757	47	MD then saline	0.05	108.02	Fig. 2D, Table S1A
Y9757	47	MD then saline	0.2	79.7851	Figs. 2B-D, Table S1A
Y9757	47	MD then saline	0.4	14.1314	Fig. 2D, Table S1A
Y9757	54	MD then saline	0.05	132.718	Table S1A
Y9757	54	MD then saline	0.2	157.919	Figs. 2B-C, Table S1A
Y9757	54	MD then saline	0.4	78.6212	Table S1A
Y9757	61	MD then saline	0.05	175.628	Table S1A
Y9757	61	MD then saline	0.2	148.65	Figs. 2B-C, Table S1A
Y9757	61	MD then saline	0.4	72.1995	Table S1A
Y9757	68	MD then saline	0.05	151.286	Table S1A
Y9757	68	MD then saline	0.2	139.207	Figs. 2B-C, Table S1A
Y9757	68	MD then saline	0.4	88.5579	Table S1A
Y9757	75	MD then saline	0.05	142.931	Fig. 2D, Table S1A
Y9757	75	MD then saline	0.2	173.835	Figs. 2B-D, Table S1A
Y9757	75	MD then saline	0.4	79.0878	Fig. 2D, Table S1A
Y9758	47	sham then saline	0.05	258.189	Fig. 2D, Table S1A
Y9758	47	sham then saline	0.2	242.841	Figs. 2B-D, Table S1A
Y9758	47	sham then saline	0.4	113.921	Fig. 2D, Table S1A
Y9758	54	sham then saline	0.05	206.379	Table S1A
Y9758	54	sham then saline	0.2	232.076	Figs. 2B-C, Table S1A
Y9758	54	sham then saline	0.4	114.931	Table S1A
Y9758	61	sham then saline	0.05	211.245	Table S1A
Y9758	61	sham then saline	0.2	254.269	Figs. 2B-C, Table S1A
Y9758	61	sham then saline	0.4	161.45	Table S1A
Y9758	68	sham then saline	0.05	222.715	Table S1A
Y9758	68	sham then saline	0.2	247.291	Figs. 2B-C, Table S1A
Y9758	68	sham then saline	0.4	119.623	Table S1A
Y9758	75	sham then saline	0.05	222.105	Fig. 2D, Table S1A
Y9758	75	sham then saline	0.2	249.718	Figs. 2B-D, Table S1A
Y9758	75	sham then saline	0.4	171.036	Fig. 2D, Table S1A
Y9759	47	MD then saline	0.05	136.431	Fig. 2D, Table S1A
Y9759	47	MD then saline	0.2	214.008	Figs. 2B-D, Table S1A
Y9759	47	MD then saline	0.4	24.5503	Fig. 2D, Table S1A
Y9759	54	MD then saline	0.05	153.074	Table S1A
Y9759	54	MD then saline	0.2	238.836	Figs. 2B-C, Table S1A
Y9759	54	MD then saline	0.4	42.5868	Table S1A
Y9759	61	MD then saline	0.05	84.9356	Table S1A
Y9759	61	MD then saline	0.2	127.029	Figs. 2B-C, Table S1A
Y9759	61	MD then saline	0.4	57.6064	Table S1A
Y9759	68	MD then saline	0.05	155.852	Table S1A
Y9759	68	MD then saline	0.2	219.117	Figs. 2B-C, Table S1A
Y9759	68	MD then saline	0.4	143.098	Table S1A
Y9759	75	MD then saline	0.05	193.7	Fig. 2D, Table S1A
Y9759	75	MD then saline	0.2	219.145	Figs. 2B-D, Table S1A
Y9759	75	MD then saline	0.4	179.253	Fig. 2D, Table S1A
Z9743	47	MD then TTX	0.05	191.696	Fig. 2D, Table S1A
Z9743	47	MD then TTX	0.2	237.36	Figs. 2B-D, Table S1A
Z9743	47	MD then TTX	0.4	84.1503	Fig. 2D, Table S1A
Z9743	54	MD then TTX	0.05	254.865	Table S1A
Z9743	54	MD then TTX	0.2	376.07	Figs. 2B-C, Table S1A
Z9743	54	MD then TTX	0.4	208.703	Table S1A
Z9743	61	MD then TTX	0.05	252.432	Table S1A
Z9743	61	MD then TTX	0.2	367.355	Figs. 2B-C, Table S1A
Z9743	61	MD then TTX	0.4	229.29	Table S1A
Z9743	68	MD then TTX	0.05	272.921	Table S1A
Z9743	68	MD then TTX	0.2	338.359	Figs. 2B-C, Table S1A
Z9743	68	MD then TTX	0.4	204.1	Table S1A
Z9743	75	MD then TTX	0.05	322.4	Fig. 2D, Table S1A
Z9743	75	MD then TTX	0.2	416.934	Figs. 2B-D, Table S1A
Z9743	75	MD then TTX	0.4	380.308	Fig. 2D, Table S1A
Z9744	47	sham then saline	0.05	228.136	Fig. 2D, Table S1A
Z9744	47	sham then saline	0.2	249.624	Figs. 2B-D, Table S1A
Z9744	47	sham then saline	0.4	138.092	Fig. 2D, Table S1A
Z9744	54	sham then saline	0.05	212.707	Table S1A
Z9744	54	sham then saline	0.2	210.896	Figs. 2B-C, Table S1A
Z9744	54	sham then saline	0.4	91.2522	Table S1A
Z9744	61	sham then saline	0.05	267.219	Table S1A
Z9744	61	sham then saline	0.2	218.413	Figs. 2B-C, Table S1A
Z9744	61	sham then saline	0.4	172.708	Table S1A
Z9744	68	sham then saline	0.05	200.468	Table S1A
Z9744	68	sham then saline	0.2	131.132	Figs. 2B-C, Table S1A
Z9744	68	sham then saline	0.4	90.4672	Table S1A
Z9744	75	sham then saline	0.05	265.275	Fig. 2D, Table S1A
Z9744	75	sham then saline	0.2	245.3	Figs. 2B-D, Table S1A
Z9744	75	sham then saline	0.4	109.185	Fig. 2D, Table S1A
Z9748	47	MD then TTX	0.05	150.94	Fig. 2D, Table S1A
Z9748	47	MD then TTX	0.2	173.592	Figs. 2B-D, Table S1A
Z9748	47	MD then TTX	0.4	53.5775	Fig. 2D, Table S1A
Z9748	54	MD then TTX	0.05	222.013	Table S1A
Z9748	54	MD then TTX	0.2	241.137	Figs. 2B-C, Table S1A
Z9748	54	MD then TTX	0.4	143.968	Table S1A
Z9748	61	MD then TTX	0.05	305.844	Table S1A
Z9748	61	MD then TTX	0.2	288.75	Figs. 2B-C, Table S1A
Z9748	61	MD then TTX	0.4	149.471	Table S1A
Z9748	68	MD then TTX	0.05	204.828	Table S1A
Z9748	68	MD then TTX	0.2	264.787	Figs. 2B-C, Table S1A
Z9748	68	MD then TTX	0.4	118.699	Table S1A
Z9748	75	MD then TTX	0.05	302.652	Fig. 2D, Table S1A
Z9748	75	MD then TTX	0.2	255.672	Figs. 2B-D, Table S1A
Z9748	75	MD then TTX	0.4	114.766	Fig. 2D, Table S1A
Z9749	47	MD then saline	0.05	90.588	Fig. 2D, Table S1A
Z9749	47	MD then saline	0.2	130.856	Figs. 2B-D, Table S1A
Z9749	47	MD then saline	0.4	64.9125	Fig. 2D, Table S1A
Z9749	54	MD then saline	0.05	132.566	Table S1A
Z9749	54	MD then saline	0.2	180.147	Figs. 2B-C, Table S1A
Z9749	54	MD then saline	0.4	96.7655	Table S1A
Z9749	61	MD then saline	0.05	121.809	Table S1A
Z9749	61	MD then saline	0.2	169.636	Figs. 2B-C, Table S1A
Z9749	61	MD then saline	0.4	124.672	Table S1A
Z9749	68	MD then saline	0.05	94.2285	Table S1A
Z9749	68	MD then saline	0.2	154.257	Figs. 2B-C, Table S1A
Z9749	68	MD then saline	0.4	120.359	Table S1A
Z9749	75	MD then saline	0.05	125.364	Fig. 2D, Table S1A
Z9749	75	MD then saline	0.2	175.202	Figs. 2B-D, Table S1A
Z9749	75	MD then saline	0.4	68.1089	Fig. 2D, Table S1A
Z9750	47	sham then saline	0.05	80.0467	Fig. 2D, Table S1A
Z9750	47	sham then saline	0.2	129.647	Figs. 2B-D, Table S1A
Z9750	47	sham then saline	0.4	87.5594	Fig. 2D, Table S1A
Z9750	54	sham then saline	0.05	79.2062	Table S1A
Z9750	54	sham then saline	0.2	143.803	Figs. 2B-C, Table S1A
Z9750	54	sham then saline	0.4	109.902	Table S1A
Z9750	61	sham then saline	0.05	166.399	Table S1A
Z9750	61	sham then saline	0.2	193.315	Figs. 2B-C, Table S1A
Z9750	61	sham then saline	0.4	131.407	Table S1A
Z9750	68	sham then saline	0.05	95.1215	Table S1A
Z9750	68	sham then saline	0.2	191.272	Figs. 2B-C, Table S1A
Z9750	68	sham then saline	0.4	93.285	Table S1A
Z9750	75	sham then saline	0.05	80.7166	Fig. 2D, Table S1A
Z9750	75	sham then saline	0.2	99.1302	Figs. 2B-D, Table S1A
Z9750	75	sham then saline	0.4	38.2613	Fig. 2D, Table S1A
Z9751	47	MD then saline	0.05	227.198	Fig. 2D, Table S1A
Z9751	47	MD then saline	0.2	195.556	Figs. 2B-D, Table S1A
Z9751	47	MD then saline	0.4	58.1231	Fig. 2D, Table S1A
Z9751	54	MD then saline	0.05	141.63	Table S1A
Z9751	54	MD then saline	0.2	144.757	Figs. 2B-C, Table S1A
Z9751	54	MD then saline	0.4	48.2547	Table S1A
Z9751	61	MD then saline	0.05	234.138	Table S1A
Z9751	61	MD then saline	0.2	281.16	Figs. 2B-C, Table S1A
Z9751	61	MD then saline	0.4	116.363	Table S1A
Z9751	68	MD then saline	0.05	131.331	Table S1A
Z9751	68	MD then saline	0.2	182.053	Figs. 2B-C, Table S1A
Z9751	68	MD then saline	0.4	37.6093	Table S1A
Z9751	75	MD then saline	0.05	212.228	Fig. 2D, Table S1A
Z9751	75	MD then saline	0.2	206.011	Figs. 2B-D, Table S1A
Z9751	75	MD then saline	0.4	64.0974	Fig. 2D, Table S1A

## Sheet: ipsilateral eye
Animal ID	Postnatal age (days)	Treatment	Spatial frequency (cpd)	VEP magnitude (uV)	Associated figure/table
A0001	47	MD then TTX	0.05	155.144	Fig. 2G, Table S1B
A0001	47	MD then TTX	0.2	159.042	Figs. 2E-G, Table S1B
A0001	47	MD then TTX	0.4	54.3932	Fig. 2G, Table S1B
A0001	54	MD then TTX	0.05	85.0903	Table S1B
A0001	54	MD then TTX	0.2	73.5545	Figs. 2E-F, Table S1B
A0001	54	MD then TTX	0.4	12.4881	Table S1B
A0001	61	MD then TTX	0.05	101.058	Table S1B
A0001	61	MD then TTX	0.2	121.224	Figs. 2E-F, Table S1B
A0001	61	MD then TTX	0.4	27.3132	Table S1B
A0001	68	MD then TTX	0.05	87.7899	Table S1B
A0001	68	MD then TTX	0.2	111.001	Figs. 2E-F, Table S1B
A0001	68	MD then TTX	0.4	52.1579	Table S1B
A0001	75	MD then TTX	0.05	36.3523	Fig. 2G, Table S1B
A0001	75	MD then TTX	0.2	56.4117	Figs. 2E-G, Table S1B
A0001	75	MD then TTX	0.4	16.3066	Fig. 2G, Table S1B
A0004	47	sham then saline	0.05	134.838	Fig. 2G, Table S1B
A0004	47	sham then saline	0.2	93.99	Figs. 2E-G, Table S1B
A0004	47	sham then saline	0.4	40.3655	Fig. 2G, Table S1B
A0004	54	sham then saline	0.05	90.1904	Table S1B
A0004	54	sham then saline	0.2	91.8198	Figs. 2E-F, Table S1B
A0004	54	sham then saline	0.4	76.9147	Table S1B
A0004	61	sham then saline	0.05	90.1775	Table S1B
A0004	61	sham then saline	0.2	67.7838	Figs. 2E-F, Table S1B
A0004	61	sham then saline	0.4	23.659	Table S1B
A0004	68	sham then saline	0.05	157.199	Table S1B
A0004	68	sham then saline	0.2	188.26	Figs. 2E-F, Table S1B
A0004	68	sham then saline	0.4	47.5494	Table S1B
A0004	75	sham then saline	0.05	82.9897	Fig. 2G, Table S1B
A0004	75	sham then saline	0.2	93.483	Figs. 2E-G, Table S1B
A0004	75	sham then saline	0.4	46.6152	Fig. 2G, Table S1B
A0007	47	MD then TTX	0.05	82.5634	Fig. 2G, Table S1B
A0007	47	MD then TTX	0.2	90.449	Figs. 2E-G, Table S1B
A0007	47	MD then TTX	0.4	29.9011	Fig. 2G, Table S1B
A0007	54	MD then TTX	0.05	97.056	Table S1B
A0007	54	MD then TTX	0.2	97.4783	Figs. 2E-F, Table S1B
A0007	54	MD then TTX	0.4	41.3602	Table S1B
A0007	61	MD then TTX	0.05	97.5575	Table S1B
A0007	61	MD then TTX	0.2	101.308	Figs. 2E-F, Table S1B
A0007	61	MD then TTX	0.4	46.3482	Table S1B
A0007	68	MD then TTX	0.05	74.3831	Table S1B
A0007	68	MD then TTX	0.2	92.0467	Figs. 2E-F, Table S1B
A0007	68	MD then TTX	0.4	47.2157	Table S1B
A0007	75	MD then TTX	0.05	63.7692	Fig. 2G, Table S1B
A0007	75	MD then TTX	0.2	72.3574	Figs. 2E-G, Table S1B
A0007	75	MD then TTX	0.4	66.3557	Fig. 2G, Table S1B
B0001	47	sham then saline	0.05	47.8887	Fig. 2G, Table S1B
B0001	47	sham then saline	0.2	101.107	Figs. 2E-G, Table S1B
B0001	47	sham then saline	0.4	17.2793	Fig. 2G, Table S1B
B0001	54	sham then saline	0.05	56.5465	Table S1B
B0001	54	sham then saline	0.2	102.909	Figs. 2E-F, Table S1B
B0001	54	sham then saline	0.4	65.9857	Table S1B
B0001	61	sham then saline	0.05	63.5832	Table S1B
B0001	61	sham then saline	0.2	116.117	Figs. 2E-F, Table S1B
B0001	61	sham then saline	0.4	44.331	Table S1B
B0001	68	sham then saline	0.05	65.2427	Table S1B
B0001	68	sham then saline	0.2	102.378	Figs. 2E-F, Table S1B
B0001	68	sham then saline	0.4	60.5631	Table S1B
B0001	75	sham then saline	0.05	73.9206	Fig. 2G, Table S1B
B0001	75	sham then saline	0.2	87.2537	Figs. 2E-G, Table S1B
B0001	75	sham then saline	0.4	15.3415	Fig. 2G, Table S1B
B0002	47	MD then TTX	0.05	170.089	Fig. 2G, Table S1B
B0002	47	MD then TTX	0.2	183.095	Figs. 2E-G, Table S1B
B0002	47	MD then TTX	0.4	59.4131	Fig. 2G, Table S1B
B0002	54	MD then TTX	0.05	265.237	Table S1B
B0002	54	MD then TTX	0.2	146.081	Figs. 2E-F, Table S1B
B0002	54	MD then TTX	0.4	46.9587	Table S1B
B0002	61	MD then TTX	0.05	73.316	Table S1B
B0002	61	MD then TTX	0.2	30.2034	Figs. 2E-F, Table S1B
B0002	61	MD then TTX	0.4	36.8465	Table S1B
B0002	68	MD then TTX	0.05	89.6848	Table S1B
B0002	68	MD then TTX	0.2	27.9179	Figs. 2E-F, Table S1B
B0002	68	MD then TTX	0.4	38.0701	Table S1B
B0002	75	MD then TTX	0.05	96.4573	Fig. 2G, Table S1B
B0002	75	MD then TTX	0.2	45.6586	Figs. 2E-G, Table S1B
B0002	75	MD then TTX	0.4	38.2616	Fig. 2G, Table S1B
B0003	47	MD then saline	0.05	101.305	Fig. 2G, Table S1B
B0003	47	MD then saline	0.2	90.8248	Figs. 2E-G, Table S1B
B0003	47	MD then saline	0.4	31.3412	Fig. 2G, Table S1B
B0003	54	MD then saline	0.05	106.603	Table S1B
B0003	54	MD then saline	0.2	103.463	Figs. 2E-F, Table S1B
B0003	54	MD then saline	0.4	52.6727	Table S1B
B0003	61	MD then saline	0.05	93.9664	Table S1B
B0003	61	MD then saline	0.2	122.829	Figs. 2E-F, Table S1B
B0003	61	MD then saline	0.4	36.2916	Table S1B
B0003	68	MD then saline	0.05	143.16	Table S1B
B0003	68	MD then saline	0.2	96.121	Figs. 2E-F, Table S1B
B0003	68	MD then saline	0.4	41.8468	Table S1B
B0003	75	MD then saline	0.05	92.3443	Fig. 2G, Table S1B
B0003	75	MD then saline	0.2	93.4296	Figs. 2E-G, Table S1B
B0003	75	MD then saline	0.4	39.4024	Fig. 2G, Table S1B
B0004	47	MD then TTX	0.05	30.3125	Fig. 2G, Table S1B
B0004	47	MD then TTX	0.2	23.8658	Figs. 2E-G, Table S1B
B0004	47	MD then TTX	0.4	16.2882	Fig. 2G, Table S1B
B0004	54	MD then TTX	0.05	41.197	Table S1B
B0004	54	MD then TTX	0.2	14.7415	Figs. 2E-F, Table S1B
B0004	54	MD then TTX	0.4	18.7369	Table S1B
B0004	61	MD then TTX	0.05	18.2528	Table S1B
B0004	61	MD then TTX	0.2	17.2369	Figs. 2E-F, Table S1B
B0004	61	MD then TTX	0.4	7.75044	Table S1B
B0004	68	MD then TTX	0.05	25.3159	Table S1B
B0004	68	MD then TTX	0.2	28.1956	Figs. 2E-F, Table S1B
B0004	68	MD then TTX	0.4	10.3084	Table S1B
B0004	75	MD then TTX	0.05	21.8893	Fig. 2G, Table S1B
B0004	75	MD then TTX	0.2	29.8893	Figs. 2E-G, Table S1B
B0004	75	MD then TTX	0.4	14.4806	Fig. 2G, Table S1B
E0569	47	sham then saline	0.05	98.6802	Fig. 2G, Table S1B
E0569	47	sham then saline	0.2	45.8648	Figs. 2E-G, Table S1B
E0569	47	sham then saline	0.4	57.8359	Fig. 2G, Table S1B
E0569	54	sham then saline	0.05	41.8327	Table S1B
E0569	54	sham then saline	0.2	81.048	Figs. 2E-F, Table S1B
E0569	54	sham then saline	0.4	21.5753	Table S1B
E0569	61	sham then saline	0.05	50.4312	Table S1B
E0569	61	sham then saline	0.2	75.65	Figs. 2E-F, Table S1B
E0569	61	sham then saline	0.4	15.3068	Table S1B
E0569	68	sham then saline	0.05	50.8535	Table S1B
E0569	68	sham then saline	0.2	46.71	Figs. 2E-F, Table S1B
E0569	68	sham then saline	0.4	7.6803	Table S1B
E0569	75	sham then saline	0.05	38.0331	Fig. 2G, Table S1B
E0569	75	sham then saline	0.2	78.4696	Figs. 2E-G, Table S1B
E0569	75	sham then saline	0.4	27.2363	Fig. 2G, Table S1B
E0570	47	MD then TTX	0.05	60.836	Fig. 2G, Table S1B
E0570	47	MD then TTX	0.2	97.921	Figs. 2E-G, Table S1B
E0570	47	MD then TTX	0.4	40.0241	Fig. 2G, Table S1B
E0570	54	MD then TTX	0.05	69.2872	Table S1B
E0570	54	MD then TTX	0.2	104.485	Figs. 2E-F, Table S1B
E0570	54	MD then TTX	0.4	51.5111	Table S1B
E0570	61	MD then TTX	0.05	68.4381	Table S1B
E0570	61	MD then TTX	0.2	98.0294	Figs. 2E-F, Table S1B
E0570	61	MD then TTX	0.4	67.7768	Table S1B
E0570	68	MD then TTX	0.05	71.306	Table S1B
E0570	68	MD then TTX	0.2	41.6697	Figs. 2E-F, Table S1B
E0570	68	MD then TTX	0.4	17.0159	Table S1B
E0570	75	MD then TTX	0.05	78.1912	Fig. 2G, Table S1B
E0570	75	MD then TTX	0.2	59.29	Figs. 2E-G, Table S1B
E0570	75	MD then TTX	0.4	60.695	Fig. 2G, Table S1B
E0571	47	MD then saline	0.05	52.7581	Fig. 2G, Table S1B
E0571	47	MD then saline	0.2	60.9349	Figs. 2E-G, Table S1B
E0571	47	MD then saline	0.4	48.5771	Fig. 2G, Table S1B
E0571	54	MD then saline	0.05	16.4922	Table S1B
E0571	54	MD then saline	0.2	11.0534	Figs. 2E-F, Table S1B
E0571	54	MD then saline	0.4	7.50245	Table S1B
E0571	61	MD then saline	0.05	227.38	Table S1B
E0571	61	MD then saline	0.2	251.344	Figs. 2E-F, Table S1B
E0571	61	MD then saline	0.4	126.293	Table S1B
E0571	68	MD then saline	0.05	65.4669	Table S1B
E0571	68	MD then saline	0.2	64.7145	Figs. 2E-F, Table S1B
E0571	68	MD then saline	0.4	37.9244	Table S1B
E0571	75	MD then saline	0.05	74.321	Fig. 2G, Table S1B
E0571	75	MD then saline	0.2	65.1896	Figs. 2E-G, Table S1B
E0571	75	MD then saline	0.4	29.4776	Fig. 2G, Table S1B
E0575	47	MD then TTX	0.05	104.882	Fig. 2G, Table S1B
E0575	47	MD then TTX	0.2	119.327	Figs. 2E-G, Table S1B
E0575	47	MD then TTX	0.4	51.1888	Fig. 2G, Table S1B
E0575	54	MD then TTX	0.05	121.497	Table S1B
E0575	54	MD then TTX	0.2	90.0984	Figs. 2E-F, Table S1B
E0575	54	MD then TTX	0.4	46.8536	Table S1B
E0575	61	MD then TTX	0.05	153.329	Table S1B
E0575	61	MD then TTX	0.2	153.365	Figs. 2E-F, Table S1B
E0575	61	MD then TTX	0.4	101.555	Table S1B
E0575	68	MD then TTX	0.05	124.498	Table S1B
E0575	68	MD then TTX	0.2	113.997	Figs. 2E-F, Table S1B
E0575	68	MD then TTX	0.4	69.2212	Table S1B
E0575	75	MD then TTX	0.05	140.787	Fig. 2G, Table S1B
E0575	75	MD then TTX	0.2	142.168	Figs. 2E-G, Table S1B
E0575	75	MD then TTX	0.4	41.3228	Fig. 2G, Table S1B
E0576	47	sham then saline	0.05	160.35	Fig. 2G, Table S1B
E0576	47	sham then saline	0.2	134.476	Figs. 2E-G, Table S1B
E0576	47	sham then saline	0.4	43.7389	Fig. 2G, Table S1B
E0576	54	sham then saline	0.05	97.1884	Table S1B
E0576	54	sham then saline	0.2	106.641	Figs. 2E-F, Table S1B
E0576	54	sham then saline	0.4	37.9212	Table S1B
E0576	61	sham then saline	0.05	123.856	Table S1B
E0576	61	sham then saline	0.2	105.55	Figs. 2E-F, Table S1B
E0576	61	sham then saline	0.4	42.2877	Table S1B
E0576	68	sham then saline	0.05	101.267	Table S1B
E0576	68	sham then saline	0.2	108.364	Figs. 2E-F, Table S1B
E0576	68	sham then saline	0.4	44.4815	Table S1B
E0576	75	sham then saline	0.05	105.227	Fig. 2G, Table S1B
E0576	75	sham then saline	0.2	63.6423	Figs. 2E-G, Table S1B
E0576	75	sham then saline	0.4	19.1564	Fig. 2G, Table S1B
E0577	47	MD then saline	0.05	175.629	Fig. 2G, Table S1B
E0577	47	MD then saline	0.2	174.753	Figs. 2E-G, Table S1B
E0577	47	MD then saline	0.4	48.7019	Fig. 2G, Table S1B
E0577	54	MD then saline	0.05	100.364	Table S1B
E0577	54	MD then saline	0.2	145.132	Figs. 2E-F, Table S1B
E0577	54	MD then saline	0.4	84.3127	Table S1B
E0577	61	MD then saline	0.05	122.323	Table S1B
E0577	61	MD then saline	0.2	154.837	Figs. 2E-F, Table S1B
E0577	61	MD then saline	0.4	105.088	Table S1B
E0577	68	MD then saline	0.05	77.1902	Table S1B
E0577	68	MD then saline	0.2	83.8925	Figs. 2E-F, Table S1B
E0577	68	MD then saline	0.4	31.3292	Table S1B
E0577	75	MD then saline	0.05	66.3908	Fig. 2G, Table S1B
E0577	75	MD then saline	0.2	77.3726	Figs. 2E-G, Table S1B
E0577	75	MD then saline	0.4	29.4755	Fig. 2G, Table S1B
L2554	47	MD then saline	0.05	99.7975	Fig. 2G, Table S1B
L2554	47	MD then saline	0.2	163.215	Figs. 2E-G, Table S1B
L2554	47	MD then saline	0.4	105.834	Fig. 2G, Table S1B
L2554	54	MD then saline	0.05	84.7472	Table S1B
L2554	54	MD then saline	0.2	76.2397	Figs. 2E-F, Table S1B
L2554	54	MD then saline	0.4	71.4458	Table S1B
L2554	61	MD then saline	0.05	15.8232	Table S1B
L2554	61	MD then saline	0.2	26.9733	Figs. 2E-F, Table S1B
L2554	61	MD then saline	0.4	20.333	Table S1B
L2554	68	MD then saline	0.05	36.2351	Table S1B
L2554	68	MD then saline	0.2	41.1902	Figs. 2E-F, Table S1B
L2554	68	MD then saline	0.4	19.4706	Table S1B
L2554	75	MD then saline	0.05	24.3533	Fig. 2G, Table S1B
L2554	75	MD then saline	0.2	30.7527	Figs. 2E-G, Table S1B
L2554	75	MD then saline	0.4	19.2294	Fig. 2G, Table S1B
L2559	47	MD then TTX	0.05	218.102	Fig. 2G, Table S1B
L2559	47	MD then TTX	0.2	113.805	Figs. 2E-G, Table S1B
L2559	47	MD then TTX	0.4	37.9038	Fig. 2G, Table S1B
L2559	54	MD then TTX	0.05	140.847	Table S1B
L2559	54	MD then TTX	0.2	169.601	Figs. 2E-F, Table S1B
L2559	54	MD then TTX	0.4	113.554	Table S1B
L2559	61	MD then TTX	0.05	110.793	Table S1B
L2559	61	MD then TTX	0.2	133.181	Figs. 2E-F, Table S1B
L2559	61	MD then TTX	0.4	125.662	Table S1B
L2559	68	MD then TTX	0.05	89.9679	Table S1B
L2559	68	MD then TTX	0.2	137.072	Figs. 2E-F, Table S1B
L2559	68	MD then TTX	0.4	91.0011	Table S1B
L2559	75	MD then TTX	0.05	112.76	Fig. 2G, Table S1B
L2559	75	MD then TTX	0.2	138.121	Figs. 2E-G, Table S1B
L2559	75	MD then TTX	0.4	78.5698	Fig. 2G, Table S1B
M6334	47	sham then saline	0.05	115.862	Fig. 2G, Table S1B
M6334	47	sham then saline	0.2	92.742	Figs. 2E-G, Table S1B
M6334	47	sham then saline	0.4	96.8455	Fig. 2G, Table S1B
M6334	54	sham then saline	0.05	139.162	Table S1B
M6334	54	sham then saline	0.2	165.327	Figs. 2E-F, Table S1B
M6334	54	sham then saline	0.4	76.2035	Table S1B
M6334	61	sham then saline	0.05	102.27	Table S1B
M6334	61	sham then saline	0.2	128.734	Figs. 2E-F, Table S1B
M6334	61	sham then saline	0.4	68.7513	Table S1B
M6334	68	sham then saline	0.05	114.657	Table S1B
M6334	68	sham then saline	0.2	90.0927	Figs. 2E-F, Table S1B
M6334	68	sham then saline	0.4	64.2791	Table S1B
M6334	75	sham then saline	0.05	86.0562	Fig. 2G, Table S1B
M6334	75	sham then saline	0.2	151.887	Figs. 2E-G, Table S1B
M6334	75	sham then saline	0.4	47.9068	Fig. 2G, Table S1B
M6335	47	MD then TTX	0.05	182.723	Fig. 2G, Table S1B
M6335	47	MD then TTX	0.2	267.541	Figs. 2E-G, Table S1B
M6335	47	MD then TTX	0.4	171.222	Fig. 2G, Table S1B
M6335	54	MD then TTX	0.05	175.789	Table S1B
M6335	54	MD then TTX	0.2	50.7342	Figs. 2E-F, Table S1B
M6335	54	MD then TTX	0.4	34.1892	Table S1B
M6335	61	MD then TTX	0.05	97.4505	Table S1B
M6335	61	MD then TTX	0.2	122.137	Figs. 2E-F, Table S1B
M6335	61	MD then TTX	0.4	49.1079	Table S1B
M6335	68	MD then TTX	0.05	112.989	Table S1B
M6335	68	MD then TTX	0.2	91.0599	Figs. 2E-F, Table S1B
M6335	68	MD then TTX	0.4	19.6995	Table S1B
M6335	75	MD then TTX	0.05	102.824	Fig. 2G, Table S1B
M6335	75	MD then TTX	0.2	95.8781	Figs. 2E-G, Table S1B
M6335	75	MD then TTX	0.4	29.0869	Fig. 2G, Table S1B
U4490	47	MD then saline	0.05	73.2571	Fig. 2G, Table S1B
U4490	47	MD then saline	0.2	73.6141	Figs. 2E-G, Table S1B
U4490	47	MD then saline	0.4	8.31721	Fig. 2G, Table S1B
U4490	54	MD then saline	0.05	68.9493	Table S1B
U4490	54	MD then saline	0.2	35.1814	Figs. 2E-F, Table S1B
U4490	54	MD then saline	0.4	12.156	Table S1B
U4490	61	MD then saline	0.05	56.6348	Table S1B
U4490	61	MD then saline	0.2	33.6214	Figs. 2E-F, Table S1B
U4490	61	MD then saline	0.4	34.6214	Table S1B
U4490	68	MD then saline	0.05	50.9008	Table S1B
U4490	68	MD then saline	0.2	40.2314	Figs. 2E-F, Table S1B
U4490	68	MD then saline	0.4	24.4997	Table S1B
U4490	75	MD then saline	0.05	29.6167	Fig. 2G, Table S1B
U4490	75	MD then saline	0.2	18.1242	Figs. 2E-G, Table S1B
U4490	75	MD then saline	0.4	16.9395	Fig. 2G, Table S1B
U4493	47	sham then saline	0.05	89.8673	Fig. 2G, Table S1B
U4493	47	sham then saline	0.2	95.4961	Figs. 2E-G, Table S1B
U4493	47	sham then saline	0.4	39.3495	Fig. 2G, Table S1B
U4493	54	sham then saline	0.05	86.4056	Table S1B
U4493	54	sham then saline	0.2	89.8282	Figs. 2E-F, Table S1B
U4493	54	sham then saline	0.4	51.1809	Table S1B
U4493	61	sham then saline	0.05	212.596	Table S1B
U4493	61	sham then saline	0.2	229.751	Figs. 2E-F, Table S1B
U4493	61	sham then saline	0.4	98.9289	Table S1B
U4493	68	sham then saline	0.05	64.0493	Table S1B
U4493	68	sham then saline	0.2	73.7776	Figs. 2E-F, Table S1B
U4493	68	sham then saline	0.4	51.0714	Table S1B
U4493	75	sham then saline	0.05	57.6423	Fig. 2G, Table S1B
U4493	75	sham then saline	0.2	33.5573	Figs. 2E-G, Table S1B
U4493	75	sham then saline	0.4	89.7609	Fig. 2G, Table S1B
U4494	47	MD then TTX	0.05	25.4983	Fig. 2G, Table S1B
U4494	47	MD then TTX	0.2	22.8094	Figs. 2E-G, Table S1B
U4494	47	MD then TTX	0.4	11.4526	Fig. 2G, Table S1B
U4494	54	MD then TTX	0.05	38.9914	Table S1B
U4494	54	MD then TTX	0.2	8.02744	Figs. 2E-F, Table S1B
U4494	54	MD then TTX	0.4	23.4997	Table S1B
U4494	61	MD then TTX	0.05	42.1387	Table S1B
U4494	61	MD then TTX	0.2	20.0438	Figs. 2E-F, Table S1B
U4494	61	MD then TTX	0.4	18.9687	Table S1B
U4494	68	MD then TTX	0.05	16.1306	Table S1B
U4494	68	MD then TTX	0.2	8.8261	Figs. 2E-F, Table S1B
U4494	68	MD then TTX	0.4	3.1208	Table S1B
U4494	75	MD then TTX	0.05	11.8473	Fig. 2G, Table S1B
U4494	75	MD then TTX	0.2	20.2686	Figs. 2E-G, Table S1B
U4494	75	MD then TTX	0.4	27.5759	Fig. 2G, Table S1B
U4497	47	sham then saline	0.05	116.832	Fig. 2G, Table S1B
U4497	47	sham then saline	0.2	138.13	Figs. 2E-G, Table S1B
U4497	47	sham then saline	0.4	80.0082	Fig. 2G, Table S1B
U4497	54	sham then saline	0.05	179.858	Table S1B
U4497	54	sham then saline	0.2	92.0088	Figs. 2E-F, Table S1B
U4497	54	sham then saline	0.4	70.18	Table S1B
U4497	61	sham then saline	0.05	206.175	Table S1B
U4497	61	sham then saline	0.2	176.433	Figs. 2E-F, Table S1B
U4497	61	sham then saline	0.4	94.8766	Table S1B
U4497	68	sham then saline	0.05	71.438	Table S1B
U4497	68	sham then saline	0.2	88.802	Figs. 2E-F, Table S1B
U4497	68	sham then saline	0.4	74.4226	Table S1B
U4497	75	sham then saline	0.05	88.7784	Fig. 2G, Table S1B
U4497	75	sham then saline	0.2	53.3215	Figs. 2E-G, Table S1B
U4497	75	sham then saline	0.4	46.9154	Fig. 2G, Table S1B
U6682	47	sham then saline	0.05	97.3232	Fig. 2G, Table S1B
U6682	47	sham then saline	0.2	139.191	Figs. 2E-G, Table S1B
U6682	47	sham then saline	0.4	26.5172	Fig. 2G, Table S1B
U6682	54	sham then saline	0.05	107.505	Table S1B
U6682	54	sham then saline	0.2	85.8536	Figs. 2E-F, Table S1B
U6682	54	sham then saline	0.4	66.3735	Table S1B
U6682	61	sham then saline	0.05	41.8472	Table S1B
U6682	61	sham then saline	0.2	42.6881	Figs. 2E-F, Table S1B
U6682	61	sham then saline	0.4	34.0679	Table S1B
U6682	68	sham then saline	0.05	73.6611	Table S1B
U6682	68	sham then saline	0.2	98.4132	Figs. 2E-F, Table S1B
U6682	68	sham then saline	0.4	61.9278	Table S1B
U6682	75	sham then saline	0.05	80.12	Fig. 2G, Table S1B
U6682	75	sham then saline	0.2	68.8272	Figs. 2E-G, Table S1B
U6682	75	sham then saline	0.4	18.4211	Fig. 2G, Table S1B
U6685	47	sham then saline	0.05	19.7202	Fig. 2G, Table S1B
U6685	47	sham then saline	0.2	33.3739	Figs. 2E-G, Table S1B
U6685	47	sham then saline	0.4	12.2245	Fig. 2G, Table S1B
U6685	54	sham then saline	0.05	47.0117	Table S1B
U6685	54	sham then saline	0.2	39.9213	Figs. 2E-F, Table S1B
U6685	54	sham then saline	0.4	7.00259	Table S1B
U6685	61	sham then saline	0.05	42.9199	Table S1B
U6685	61	sham then saline	0.2	21.5483	Figs. 2E-F, Table S1B
U6685	61	sham then saline	0.4	9.94477	Table S1B
U6685	68	sham then saline	0.05	26.7522	Table S1B
U6685	68	sham then saline	0.2	45.9146	Figs. 2E-F, Table S1B
U6685	68	sham then saline	0.4	41.0065	Table S1B
U6685	75	sham then saline	0.05	45.8367	Fig. 2G, Table S1B
U6685	75	sham then saline	0.2	23.0857	Figs. 2E-G, Table S1B
U6685	75	sham then saline	0.4	23.3542	Fig. 2G, Table S1B
U6686	47	MD then saline	0.05	44.4075	Fig. 2G, Table S1B
U6686	47	MD then saline	0.2	36.5538	Figs. 2E-G, Table S1B
U6686	47	MD then saline	0.4	15.9336	Fig. 2G, Table S1B
U6686	54	MD then saline	0.05	60.245	Table S1B
U6686	54	MD then saline	0.2	50.3344	Figs. 2E-F, Table S1B
U6686	54	MD then saline	0.4	85.5137	Table S1B
U6686	61	MD then saline	0.05	18.6719	Table S1B
U6686	61	MD then saline	0.2	10.5262	Figs. 2E-F, Table S1B
U6686	61	MD then saline	0.4	6.01656	Table S1B
U6686	68	MD then saline	0.05	40.7663	Table S1B
U6686	68	MD then saline	0.2	51.4621	Figs. 2E-F, Table S1B
U6686	68	MD then saline	0.4	23.0079	Table S1B
U6686	75	MD then saline	0.05	50.3687	Fig. 2G, Table S1B
U6686	75	MD then saline	0.2	51.5007	Figs. 2E-G, Table S1B
U6686	75	MD then saline	0.4	16.0474	Fig. 2G, Table S1B
U6689	47	sham then saline	0.05	23.545	Fig. 2G, Table S1B
U6689	47	sham then saline	0.2	41.5285	Figs. 2E-G, Table S1B
U6689	47	sham then saline	0.4	16.5178	Fig. 2G, Table S1B
U6689	54	sham then saline	0.05	52.0155	Table S1B
U6689	54	sham then saline	0.2	45.7739	Figs. 2E-F, Table S1B
U6689	54	sham then saline	0.4	14.4168	Table S1B
U6689	61	sham then saline	0.05	41.8032	Table S1B
U6689	61	sham then saline	0.2	57.4414	Figs. 2E-F, Table S1B
U6689	61	sham then saline	0.4	23.4887	Table S1B
U6689	68	sham then saline	0.05	77.4897	Table S1B
U6689	68	sham then saline	0.2	79.773	Figs. 2E-F, Table S1B
U6689	68	sham then saline	0.4	26.3714	Table S1B
U6689	75	sham then saline	0.05	80.4527	Fig. 2G, Table S1B
U6689	75	sham then saline	0.2	80.9746	Figs. 2E-G, Table S1B
U6689	75	sham then saline	0.4	46.4458	Fig. 2G, Table S1B
U6690	47	MD then TTX	0.05	60.7177	Fig. 2G, Table S1B
U6690	47	MD then TTX	0.2	60.085	Figs. 2E-G, Table S1B
U6690	47	MD then TTX	0.4	44.1047	Fig. 2G, Table S1B
U6690	54	MD then TTX	0.05	70.8361	Table S1B
U6690	54	MD then TTX	0.2	66.1409	Figs. 2E-F, Table S1B
U6690	54	MD then TTX	0.4	27.3581	Table S1B
U6690	61	MD then TTX	0.05	79.9351	Table S1B
U6690	61	MD then TTX	0.2	56.1279	Figs. 2E-F, Table S1B
U6690	61	MD then TTX	0.4	48.2418	Table S1B
U6690	68	MD then TTX	0.05	62.5355	Table S1B
U6690	68	MD then TTX	0.2	51.3161	Figs. 2E-F, Table S1B
U6690	68	MD then TTX	0.4	26.7662	Table S1B
U6690	75	MD then TTX	0.05	58.3411	Fig. 2G, Table S1B
U6690	75	MD then TTX	0.2	18.252	Figs. 2E-G, Table S1B
U6690	75	MD then TTX	0.4	9.53688	Fig. 2G, Table S1B
V4480	47	MD then saline	0.05	53.752	Fig. 2G, Table S1B
V4480	47	MD then saline	0.2	42.6946	Figs. 2E-G, Table S1B
V4480	47	MD then saline	0.4	30.9975	Fig. 2G, Table S1B
V4480	54	MD then saline	0.05	48.2986	Table S1B
V4480	54	MD then saline	0.2	79.2347	Figs. 2E-F, Table S1B
V4480	54	MD then saline	0.4	16.1569	Table S1B
V4480	61	MD then saline	0.05	49.2849	Table S1B
V4480	61	MD then saline	0.2	56.293	Figs. 2E-F, Table S1B
V4480	61	MD then saline	0.4	42.328	Table S1B
V4480	68	MD then saline	0.05	22.6623	Table S1B
V4480	68	MD then saline	0.2	40.3375	Figs. 2E-F, Table S1B
V4480	68	MD then saline	0.4	32.4463	Table S1B
V4480	75	MD then saline	0.05	4.09667	Fig. 2G, Table S1B
V4480	75	MD then saline	0.2	17.342	Figs. 2E-G, Table S1B
V4480	75	MD then saline	0.4	6.85779	Fig. 2G, Table S1B
V4483	47	sham then saline	0.05	65.5627	Fig. 2G, Table S1B
V4483	47	sham then saline	0.2	55.2104	Figs. 2E-G, Table S1B
V4483	47	sham then saline	0.4	3.52188	Fig. 2G, Table S1B
V4483	54	sham then saline	0.05	15.0119	Table S1B
V4483	54	sham then saline	0.2	32.5208	Figs. 2E-F, Table S1B
V4483	54	sham then saline	0.4	15.5718	Table S1B
V4483	61	sham then saline	0.05	57.6565	Table S1B
V4483	61	sham then saline	0.2	54.4279	Figs. 2E-F, Table S1B
V4483	61	sham then saline	0.4	6.73311	Table S1B
V4483	68	sham then saline	0.05	61.1877	Table S1B
V4483	68	sham then saline	0.2	55.6258	Figs. 2E-F, Table S1B
V4483	68	sham then saline	0.4	16.8966	Table S1B
V4483	75	sham then saline	0.05	46.6566	Fig. 2G, Table S1B
V4483	75	sham then saline	0.2	66.0918	Figs. 2E-G, Table S1B
V4483	75	sham then saline	0.4	23.0204	Fig. 2G, Table S1B
X4542	47	MD then saline	0.05	119.559	Fig. 2G, Table S1B
X4542	47	MD then saline	0.2	126.391	Figs. 2E-G, Table S1B
X4542	47	MD then saline	0.4	49.9718	Fig. 2G, Table S1B
X4542	54	MD then saline	0.05	33.2291	Table S1B
X4542	54	MD then saline	0.2	27.2103	Figs. 2E-F, Table S1B
X4542	54	MD then saline	0.4	22.6383	Table S1B
X4542	61	MD then saline	0.05	23.3756	Table S1B
X4542	61	MD then saline	0.2	17.0571	Figs. 2E-F, Table S1B
X4542	61	MD then saline	0.4	16.2383	Table S1B
X4542	68	MD then saline	0.05	4.74018	Table S1B
X4542	68	MD then saline	0.2	13.3394	Figs. 2E-F, Table S1B
X4542	68	MD then saline	0.4	7.84685	Table S1B
X4542	75	MD then saline	0.05	14.8696	Fig. 2G, Table S1B
X4542	75	MD then saline	0.2	9.23671	Figs. 2E-G, Table S1B
X4542	75	MD then saline	0.4	13.8949	Fig. 2G, Table S1B
X4545	47	MD then TTX	0.05	82.8296	Fig. 2G, Table S1B
X4545	47	MD then TTX	0.2	122.782	Figs. 2E-G, Table S1B
X4545	47	MD then TTX	0.4	49.8631	Fig. 2G, Table S1B
X4545	54	MD then TTX	0.05	104.842	Table S1B
X4545	54	MD then TTX	0.2	44.0404	Figs. 2E-F, Table S1B
X4545	54	MD then TTX	0.4	11.6926	Table S1B
X4545	61	MD then TTX	0.05	43.3552	Table S1B
X4545	61	MD then TTX	0.2	58.9226	Figs. 2E-F, Table S1B
X4545	61	MD then TTX	0.4	39.7616	Table S1B
X4545	68	MD then TTX	0.05	33.9054	Table S1B
X4545	68	MD then TTX	0.2	30.8432	Figs. 2E-F, Table S1B
X4545	68	MD then TTX	0.4	35.7545	Table S1B
X4545	75	MD then TTX	0.05	37.3965	Fig. 2G, Table S1B
X4545	75	MD then TTX	0.2	27.2262	Figs. 2E-G, Table S1B
X4545	75	MD then TTX	0.4	24.5591	Fig. 2G, Table S1B
X4546	47	MD then saline	0.05	103.389	Fig. 2G, Table S1B
X4546	47	MD then saline	0.2	74.5412	Figs. 2E-G, Table S1B
X4546	47	MD then saline	0.4	29.4511	Fig. 2G, Table S1B
X4546	54	MD then saline	0.05	49.2401	Table S1B
X4546	54	MD then saline	0.2	62.0268	Figs. 2E-F, Table S1B
X4546	54	MD then saline	0.4	28.5363	Table S1B
X4546	61	MD then saline	0.05	75.3717	Table S1B
X4546	61	MD then saline	0.2	59.3526	Figs. 2E-F, Table S1B
X4546	61	MD then saline	0.4	33.8791	Table S1B
X4546	68	MD then saline	0.05	62.3856	Table S1B
X4546	68	MD then saline	0.2	45.3605	Figs. 2E-F, Table S1B
X4546	68	MD then saline	0.4	50.5797	Table S1B
X4546	75	MD then saline	0.05	55.6967	Fig. 2G, Table S1B
X4546	75	MD then saline	0.2	28.3973	Figs. 2E-G, Table S1B
X4546	75	MD then saline	0.4	54.5608	Fig. 2G, Table S1B
X4547	47	sham then saline	0.05	105.078	Fig. 2G, Table S1B
X4547	47	sham then saline	0.2	136.224	Figs. 2E-G, Table S1B
X4547	47	sham then saline	0.4	111.739	Fig. 2G, Table S1B
X4547	54	sham then saline	0.05	154.509	Table S1B
X4547	54	sham then saline	0.2	57.6159	Figs. 2E-F, Table S1B
X4547	54	sham then saline	0.4	30.8876	Table S1B
X4547	61	sham then saline	0.05	145.172	Table S1B
X4547	61	sham then saline	0.2	81.9469	Figs. 2E-F, Table S1B
X4547	61	sham then saline	0.4	40.8936	Table S1B
X4547	68	sham then saline	0.05	138.17	Table S1B
X4547	68	sham then saline	0.2	80.0224	Figs. 2E-F, Table S1B
X4547	68	sham then saline	0.4	31.5652	Table S1B
X4547	75	sham then saline	0.05	118.523	Fig. 2G, Table S1B
X4547	75	sham then saline	0.2	68.5042	Figs. 2E-G, Table S1B
X4547	75	sham then saline	0.4	14.8749	Fig. 2G, Table S1B
X4548	47	sham then saline	0.05	81.5269	Fig. 2G, Table S1B
X4548	47	sham then saline	0.2	108.26	Figs. 2E-G, Table S1B
X4548	47	sham then saline	0.4	37.7837	Fig. 2G, Table S1B
X4548	54	sham then saline	0.05	87.1726	Table S1B
X4548	54	sham then saline	0.2	38.0415	Figs. 2E-F, Table S1B
X4548	54	sham then saline	0.4	27.744	Table S1B
X4548	61	sham then saline	0.05	53.1784	Table S1B
X4548	61	sham then saline	0.2	53.3708	Figs. 2E-F, Table S1B
X4548	61	sham then saline	0.4	16.8371	Table S1B
X4548	68	sham then saline	0.05	58.0454	Table S1B
X4548	68	sham then saline	0.2	44.4659	Figs. 2E-F, Table S1B
X4548	68	sham then saline	0.4	26.3776	Table S1B
X4548	75	sham then saline	0.05	36.1793	Fig. 2G, Table S1B
X4548	75	sham then saline	0.2	27.6624	Figs. 2E-G, Table S1B
X4548	75	sham then saline	0.4	28.4871	Fig. 2G, Table S1B
Y9757	47	MD then saline	0.05	68.7972	Fig. 2G, Table S1B
Y9757	47	MD then saline	0.2	160.14	Figs. 2E-G, Table S1B
Y9757	47	MD then saline	0.4	84.8056	Fig. 2G, Table S1B
Y9757	54	MD then saline	0.05	85.3053	Table S1B
Y9757	54	MD then saline	0.2	95.5045	Figs. 2E-F, Table S1B
Y9757	54	MD then saline	0.4	30.2476	Table S1B
Y9757	61	MD then saline	0.05	97.2581	Table S1B
Y9757	61	MD then saline	0.2	62.1079	Figs. 2E-F, Table S1B
Y9757	61	MD then saline	0.4	45.5503	Table S1B
Y9757	68	MD then saline	0.05	53.7615	Table S1B
Y9757	68	MD then saline	0.2	82.858	Figs. 2E-F, Table S1B
Y9757	68	MD then saline	0.4	67.0435	Table S1B
Y9757	75	MD then saline	0.05	71.4807	Fig. 2G, Table S1B
Y9757	75	MD then saline	0.2	124.359	Figs. 2E-G, Table S1B
Y9757	75	MD then saline	0.4	38.9553	Fig. 2G, Table S1B
Y9758	47	sham then saline	0.05	122.712	Fig. 2G, Table S1B
Y9758	47	sham then saline	0.2	122.965	Figs. 2E-G, Table S1B
Y9758	47	sham then saline	0.4	62.2363	Fig. 2G, Table S1B
Y9758	54	sham then saline	0.05	119.802	Table S1B
Y9758	54	sham then saline	0.2	146.272	Figs. 2E-F, Table S1B
Y9758	54	sham then saline	0.4	87.6414	Table S1B
Y9758	61	sham then saline	0.05	176.287	Table S1B
Y9758	61	sham then saline	0.2	146.269	Figs. 2E-F, Table S1B
Y9758	61	sham then saline	0.4	49.9537	Table S1B
Y9758	68	sham then saline	0.05	146.975	Table S1B
Y9758	68	sham then saline	0.2	159.86	Figs. 2E-F, Table S1B
Y9758	68	sham then saline	0.4	59.6567	Table S1B
Y9758	75	sham then saline	0.05	169.797	Fig. 2G, Table S1B
Y9758	75	sham then saline	0.2	169.315	Figs. 2E-G, Table S1B
Y9758	75	sham then saline	0.4	61.8261	Fig. 2G, Table S1B
Y9759	47	MD then saline	0.05	134.981	Fig. 2G, Table S1B
Y9759	47	MD then saline	0.2	198.493	Figs. 2E-G, Table S1B
Y9759	47	MD then saline	0.4	90.2541	Fig. 2G, Table S1B
Y9759	54	MD then saline	0.05	103.831	Table S1B
Y9759	54	MD then saline	0.2	115.619	Figs. 2E-F, Table S1B
Y9759	54	MD then saline	0.4	72.5476	Table S1B
Y9759	61	MD then saline	0.05	80.3581	Table S1B
Y9759	61	MD then saline	0.2	85.3561	Figs. 2E-F, Table S1B
Y9759	61	MD then saline	0.4	33.2369	Table S1B
Y9759	68	MD then saline	0.05	83.9231	Table S1B
Y9759	68	MD then saline	0.2	127.516	Figs. 2E-F, Table S1B
Y9759	68	MD then saline	0.4	40.7755	Table S1B
Y9759	75	MD then saline	0.05	82.1273	Fig. 2G, Table S1B
Y9759	75	MD then saline	0.2	155.671	Figs. 2E-G, Table S1B
Y9759	75	MD then saline	0.4	47.768	Fig. 2G, Table S1B
Z9743	47	MD then TTX	0.05	118.378	Fig. 2G, Table S1B
Z9743	47	MD then TTX	0.2	233.677	Figs. 2E-G, Table S1B
Z9743	47	MD then TTX	0.4	187.424	Fig. 2G, Table S1B
Z9743	54	MD then TTX	0.05	175.022	Table S1B
Z9743	54	MD then TTX	0.2	278.15	Figs. 2E-F, Table S1B
Z9743	54	MD then TTX	0.4	157.784	Table S1B
Z9743	61	MD then TTX	0.05	140.572	Table S1B
Z9743	61	MD then TTX	0.2	174.578	Figs. 2E-F, Table S1B
Z9743	61	MD then TTX	0.4	172.178	Table S1B
Z9743	68	MD then TTX	0.05	109.978	Table S1B
Z9743	68	MD then TTX	0.2	177.481	Figs. 2E-F, Table S1B
Z9743	68	MD then TTX	0.4	61.7932	Table S1B
Z9743	75	MD then TTX	0.05	159.29	Fig. 2G, Table S1B
Z9743	75	MD then TTX	0.2	247.527	Figs. 2E-G, Table S1B
Z9743	75	MD then TTX	0.4	156.716	Fig. 2G, Table S1B
Z9744	47	sham then saline	0.05	125.545	Fig. 2G, Table S1B
Z9744	47	sham then saline	0.2	70.869	Figs. 2E-G, Table S1B
Z9744	47	sham then saline	0.4	69.0105	Fig. 2G, Table S1B
Z9744	54	sham then saline	0.05	116.843	Table S1B
Z9744	54	sham then saline	0.2	105.431	Figs. 2E-F, Table S1B
Z9744	54	sham then saline	0.4	36.6996	Table S1B
Z9744	61	sham then saline	0.05	282.238	Table S1B
Z9744	61	sham then saline	0.2	213.403	Figs. 2E-F, Table S1B
Z9744	61	sham then saline	0.4	114.459	Table S1B
Z9744	68	sham then saline	0.05	104.381	Table S1B
Z9744	68	sham then saline	0.2	94.6815	Figs. 2E-F, Table S1B
Z9744	68	sham then saline	0.4	49.4385	Table S1B
Z9744	75	sham then saline	0.05	85.6351	Fig. 2G, Table S1B
Z9744	75	sham then saline	0.2	76.4978	Figs. 2E-G, Table S1B
Z9744	75	sham then saline	0.4	66.1886	Fig. 2G, Table S1B
Z9748	47	MD then TTX	0.05	178.637	Fig. 2G, Table S1B
Z9748	47	MD then TTX	0.2	197.64	Figs. 2E-G, Table S1B
Z9748	47	MD then TTX	0.4	58.9318	Fig. 2G, Table S1B
Z9748	54	MD then TTX	0.05	217.885	Table S1B
Z9748	54	MD then TTX	0.2	205.351	Figs. 2E-F, Table S1B
Z9748	54	MD then TTX	0.4	57.099	Table S1B
Z9748	61	MD then TTX	0.05	205.396	Table S1B
Z9748	61	MD then TTX	0.2	248.56	Figs. 2E-F, Table S1B
Z9748	61	MD then TTX	0.4	141.229	Table S1B
Z9748	68	MD then TTX	0.05	137.542	Table S1B
Z9748	68	MD then TTX	0.2	164.379	Figs. 2E-F, Table S1B
Z9748	68	MD then TTX	0.4	60.379	Table S1B
Z9748	75	MD then TTX	0.05	175.025	Fig. 2G, Table S1B
Z9748	75	MD then TTX	0.2	132.739	Figs. 2E-G, Table S1B
Z9748	75	MD then TTX	0.4	91.8241	Fig. 2G, Table S1B
Z9749	47	MD then saline	0.05	100.147	Fig. 2G, Table S1B
Z9749	47	MD then saline	0.2	109.344	Figs. 2E-G, Table S1B
Z9749	47	MD then saline	0.4	39.6569	Fig. 2G, Table S1B
Z9749	54	MD then saline	0.05	128.607	Table S1B
Z9749	54	MD then saline	0.2	77.0194	Figs. 2E-F, Table S1B
Z9749	54	MD then saline	0.4	18.7104	Table S1B
Z9749	61	MD then saline	0.05	57.9641	Table S1B
Z9749	61	MD then saline	0.2	64.3579	Figs. 2E-F, Table S1B
Z9749	61	MD then saline	0.4	21.1701	Table S1B
Z9749	68	MD then saline	0.05	47.4842	Table S1B
Z9749	68	MD then saline	0.2	18.323	Figs. 2E-F, Table S1B
Z9749	68	MD then saline	0.4	15.1892	Table S1B
Z9749	75	MD then saline	0.05	47.2237	Fig. 2G, Table S1B
Z9749	75	MD then saline	0.2	52.0712	Figs. 2E-G, Table S1B
Z9749	75	MD then saline	0.4	7.01147	Fig. 2G, Table S1B
Z9750	47	sham then saline	0.05	45.4969	Fig. 2G, Table S1B
Z9750	47	sham then saline	0.2	52.3651	Figs. 2E-G, Table S1B
Z9750	47	sham then saline	0.4	43.5331	Fig. 2G, Table S1B
Z9750	54	sham then saline	0.05	41.6795	Table S1B
Z9750	54	sham then saline	0.2	78.8809	Figs. 2E-F, Table S1B
Z9750	54	sham then saline	0.4	42.9523	Table S1B
Z9750	61	sham then saline	0.05	103.451	Table S1B
Z9750	61	sham then saline	0.2	117.815	Figs. 2E-F, Table S1B
Z9750	61	sham then saline	0.4	70.7675	Table S1B
Z9750	68	sham then saline	0.05	31.0782	Table S1B
Z9750	68	sham then saline	0.2	75.7675	Figs. 2E-F, Table S1B
Z9750	68	sham then saline	0.4	37.9641	Table S1B
Z9750	75	sham then saline	0.05	33.9318	Fig. 2G, Table S1B
Z9750	75	sham then saline	0.2	52.1737	Figs. 2E-G, Table S1B
Z9750	75	sham then saline	0.4	30.9492	Fig. 2G, Table S1B
Z9751	47	MD then saline	0.05	323.84	Fig. 2G, Table S1B
Z9751	47	MD then saline	0.2	231.825	Figs. 2E-G, Table S1B
Z9751	47	MD then saline	0.4	107.632	Fig. 2G, Table S1B
Z9751	54	MD then saline	0.05	99.0703	Table S1B
Z9751	54	MD then saline	0.2	78.8183	Figs. 2E-F, Table S1B
Z9751	54	MD then saline	0.4	28.2265	Table S1B
Z9751	61	MD then saline	0.05	163.891	Table S1B
Z9751	61	MD then saline	0.2	161.98	Figs. 2E-F, Table S1B
Z9751	61	MD then saline	0.4	34.5693	Table S1B
Z9751	68	MD then saline	0.05	122.711	Table S1B
Z9751	68	MD then saline	0.2	99.7062	Figs. 2E-F, Table S1B
Z9751	68	MD then saline	0.4	19.3091	Table S1B
Z9751	75	MD then saline	0.05	134.063	Fig. 2G, Table S1B
Z9751	75	MD then saline	0.2	109.752	Figs. 2E-G, Table S1B
Z9751	75	MD then saline	0.4	30.2147	Fig. 2G, Table S1B
