# Supplementary material for: Correction of amblyopia in cats and mice after the critical period
Source: eLife. 2021 Aug 31;10:e70023. doi: 10.7554/eLife.70023 (PMC8456712; doi:10.7554/eLife.70023)
Supplement: Figure 3—source data 1. [file elife-70023-fig3-data1.xlsx]

## Sheet: contralateral eye
Animal ID	Postnatal age (days)	Treatment	Spatial frequency (cpd)	VEP magnitude (uV)	Associated figure/table
E5060	47	MD then RO	0.05	79.9831	Fig. 3D, Table S2A
E5060	47	MD then RO	0.2	53.6312	Figs. 3B-D, Table S2A
E5060	47	MD then RO	0.4	46.3801	Fig. 3D, Table S2A
E5060	54	MD then RO	0.05	199.586	Fig. 3D, Table S2A
E5060	54	MD then RO	0.2	151.825	Figs. 3B-D, Table S2A
E5060	54	MD then RO	0.4	92.2347	Fig. 3D, Table S2A
E5060	61	MD then RO	0.05	20.5646	Table S2A
E5060	61	MD then RO	0.2	30.5684	Figs. 3B-C, Table S2A
E5060	61	MD then RO	0.4	15.8093	Table S2A
E5060	68	MD then RO	0.05	27.7658	Table S2A
E5060	68	MD then RO	0.2	35.2883	Figs. 3B-C, Table S2A
E5060	68	MD then RO	0.4	22.1703	Table S2A
E5060	75	MD then RO	0.05	40.1215	Fig. 3D, Table S2A
E5060	75	MD then RO	0.2	27.008	Figs. 3B-D, Table S2A
E5060	75	MD then RO	0.4	18.1217	Fig. 3D, Table S2A
E5064	47	MD then RO	0.05	159.042	Fig. 3D, Table S2A
E5064	47	MD then RO	0.2	43.1649	Figs. 3B-D, Table S2A
E5064	47	MD then RO	0.4	21.887	Fig. 3D, Table S2A
E5064	54	MD then RO	0.05	118.866	Fig. 3D, Table S2A
E5064	54	MD then RO	0.2	106.441	Figs. 3B-D, Table S2A
E5064	54	MD then RO	0.4	25.3742	Fig. 3D, Table S2A
E5064	61	MD then RO	0.05	15.0709	Table S2A
E5064	61	MD then RO	0.2	18.8003	Figs. 3B-C, Table S2A
E5064	61	MD then RO	0.4	15.787	Table S2A
E5064	68	MD then RO	0.05	12.9309	Table S2A
E5064	68	MD then RO	0.2	11.4694	Figs. 3B-C, Table S2A
E5064	68	MD then RO	0.4	12.4987	Table S2A
E5064	75	MD then RO	0.05	13.2525	Fig. 3D, Table S2A
E5064	75	MD then RO	0.2	17.3548	Figs. 3B-D, Table S2A
E5064	75	MD then RO	0.4	9.29717	Fig. 3D, Table S2A
E5065	47	MD then TTX	0.05	214.959	Fig. 3D, Table S2A
E5065	47	MD then TTX	0.2	200.477	Figs. 3B-D, Table S2A
E5065	47	MD then TTX	0.4	38.2947	Fig. 3D, Table S2A
E5065	54	MD then TTX	0.05	363.244	Fig. 3D, Table S2A
E5065	54	MD then TTX	0.2	258.601	Figs. 3B-D, Table S2A
E5065	54	MD then TTX	0.4	174.95	Fig. 3D, Table S2A
E5065	61	MD then TTX	0.05	207.814	Table S2A
E5065	61	MD then TTX	0.2	200.096	Figs. 3B-C, Table S2A
E5065	61	MD then TTX	0.4	109.849	Table S2A
E5065	68	MD then TTX	0.05	274.551	Table S2A
E5065	68	MD then TTX	0.2	221.745	Figs. 3B-C, Table S2A
E5065	68	MD then TTX	0.4	163.93	Table S2A
E5065	75	MD then TTX	0.05	289.58	Fig. 3D, Table S2A
E5065	75	MD then TTX	0.2	221.462	Figs. 3B-D, Table S2A
E5065	75	MD then TTX	0.4	158.917	Fig. 3D, Table S2A
E5066	47	MD then TTX	0.05	93.7323	Fig. 3D, Table S2A
E5066	47	MD then TTX	0.2	106.819	Figs. 3B-D, Table S2A
E5066	47	MD then TTX	0.4	68.5535	Fig. 3D, Table S2A
E5066	54	MD then TTX	0.05	150.036	Fig. 3D, Table S2A
E5066	54	MD then TTX	0.2	240.409	Figs. 3B-D, Table S2A
E5066	54	MD then TTX	0.4	101.406	Fig. 3D, Table S2A
E5066	61	MD then TTX	0.05	133.142	Table S2A
E5066	61	MD then TTX	0.2	195.822	Figs. 3B-C, Table S2A
E5066	61	MD then TTX	0.4	75.2694	Table S2A
E5066	68	MD then TTX	0.05	161.998	Table S2A
E5066	68	MD then TTX	0.2	153.037	Figs. 3B-C, Table S2A
E5066	68	MD then TTX	0.4	75.2687	Table S2A
E5066	75	MD then TTX	0.05	158.032	Fig. 3D, Table S2A
E5066	75	MD then TTX	0.2	136.433	Figs. 3B-D, Table S2A
E5066	75	MD then TTX	0.4	71.9698	Fig. 3D, Table S2A
E5067	47	MD then RO	0.05	133.905	Fig. 3D, Table S2A
E5067	47	MD then RO	0.2	127.67	Figs. 3B-D, Table S2A
E5067	47	MD then RO	0.4	66.3981	Fig. 3D, Table S2A
E5067	54	MD then RO	0.05	269.525	Fig. 3D, Table S2A
E5067	54	MD then RO	0.2	197.647	Figs. 3B-D, Table S2A
E5067	54	MD then RO	0.4	110.905	Fig. 3D, Table S2A
E5067	61	MD then RO	0.05	174.101	Table S2A
E5067	61	MD then RO	0.2	160.025	Figs. 3B-C, Table S2A
E5067	61	MD then RO	0.4	124.324	Table S2A
E5067	68	MD then RO	0.05	216.947	Table S2A
E5067	68	MD then RO	0.2	170.368	Figs. 3B-C, Table S2A
E5067	68	MD then RO	0.4	88.1033	Table S2A
E5067	75	MD then RO	0.05	208.386	Fig. 3D, Table S2A
E5067	75	MD then RO	0.2	131.333	Figs. 3B-D, Table S2A
E5067	75	MD then RO	0.4	92.0854	Fig. 3D, Table S2A
E5068	47	MD then TTX	0.05	125.257	Fig. 3D, Table S2A
E5068	47	MD then TTX	0.2	125.574	Figs. 3B-D, Table S2A
E5068	47	MD then TTX	0.4	78.963	Fig. 3D, Table S2A
E5068	54	MD then TTX	0.05	224.455	Fig. 3D, Table S2A
E5068	54	MD then TTX	0.2	209.683	Figs. 3B-D, Table S2A
E5068	54	MD then TTX	0.4	192.246	Fig. 3D, Table S2A
E5068	61	MD then TTX	0.05	130.773	Table S2A
E5068	61	MD then TTX	0.2	230.585	Figs. 3B-C, Table S2A
E5068	61	MD then TTX	0.4	166.147	Table S2A
E5068	68	MD then TTX	0.05	218.865	Table S2A
E5068	68	MD then TTX	0.2	276.385	Figs. 3B-C, Table S2A
E5068	68	MD then TTX	0.4	137.683	Table S2A
E5068	75	MD then TTX	0.05	274.649	Fig. 3D, Table S2A
E5068	75	MD then TTX	0.2	243.684	Figs. 3B-D, Table S2A
E5068	75	MD then TTX	0.4	150.997	Fig. 3D, Table S2A
E5069	47	MD then RO	0.05	63.0753	Fig. 3D, Table S2A
E5069	47	MD then RO	0.2	63.9774	Figs. 3B-D, Table S2A
E5069	47	MD then RO	0.4	28.2439	Fig. 3D, Table S2A
E5069	54	MD then RO	0.05	183.242	Fig. 3D, Table S2A
E5069	54	MD then RO	0.2	156.137	Figs. 3B-D, Table S2A
E5069	54	MD then RO	0.4	86.4656	Fig. 3D, Table S2A
E5069	61	MD then RO	0.05	43.3419	Table S2A
E5069	61	MD then RO	0.2	39.6094	Figs. 3B-C, Table S2A
E5069	61	MD then RO	0.4	20.4089	Table S2A
E5069	68	MD then RO	0.05	63.2292	Table S2A
E5069	68	MD then RO	0.2	69.7969	Figs. 3B-C, Table S2A
E5069	68	MD then RO	0.4	26.1697	Table S2A
E5069	75	MD then RO	0.05	101.203	Fig. 3D, Table S2A
E5069	75	MD then RO	0.2	73.9982	Figs. 3B-D, Table S2A
E5069	75	MD then RO	0.4	45.6733	Fig. 3D, Table S2A
F5147	47	MD then TTX	0.05	79.9303	Fig. 3D, Table S2A
F5147	47	MD then TTX	0.2	152.604	Figs. 3B-D, Table S2A
F5147	47	MD then TTX	0.4	29.9079	Fig. 3D, Table S2A
F5147	54	MD then TTX	0.05	102.217	Fig. 3D, Table S2A
F5147	54	MD then TTX	0.2	100.294	Figs. 3B-D, Table S2A
F5147	54	MD then TTX	0.4	65.6154	Fig. 3D, Table S2A
F5147	61	MD then TTX	0.05	151.545	Table S2A
F5147	61	MD then TTX	0.2	169.694	Figs. 3B-C, Table S2A
F5147	61	MD then TTX	0.4	91.8381	Table S2A
F5147	68	MD then TTX	0.05	109.728	Table S2A
F5147	68	MD then TTX	0.2	124.041	Figs. 3B-C, Table S2A
F5147	68	MD then TTX	0.4	67.2464	Table S2A
F5147	75	MD then TTX	0.05	149.739	Fig. 3D, Table S2A
F5147	75	MD then TTX	0.2	185.449	Figs. 3B-D, Table S2A
F5147	75	MD then TTX	0.4	104.9	Fig. 3D, Table S2A
F5148	47	MD then RO	0.05	78.1831	Fig. 3D, Table S2A
F5148	47	MD then RO	0.2	45.9667	Figs. 3B-D, Table S2A
F5148	47	MD then RO	0.4	31.5209	Fig. 3D, Table S2A
F5148	54	MD then RO	0.05	86.6611	Fig. 3D, Table S2A
F5148	54	MD then RO	0.2	77.882	Figs. 3B-D, Table S2A
F5148	54	MD then RO	0.4	40.0413	Fig. 3D, Table S2A
F5148	61	MD then RO	0.05	71.4199	Table S2A
F5148	61	MD then RO	0.2	78.4451	Figs. 3B-C, Table S2A
F5148	61	MD then RO	0.4	42.5973	Table S2A
F5148	68	MD then RO	0.05	41.3392	Table S2A
F5148	68	MD then RO	0.2	59.3399	Figs. 3B-C, Table S2A
F5148	68	MD then RO	0.4	24.9975	Table S2A
F5148	75	MD then RO	0.05	25.3533	Fig. 3D, Table S2A
F5148	75	MD then RO	0.2	46.8325	Figs. 3B-D, Table S2A
F5148	75	MD then RO	0.4	20.6378	Fig. 3D, Table S2A
F5149	47	MD then RO	0.05	117.59	Fig. 3D, Table S2A
F5149	47	MD then RO	0.2	99.6936	Figs. 3B-D, Table S2A
F5149	47	MD then RO	0.4	26.4865	Fig. 3D, Table S2A
F5149	54	MD then RO	0.05	268.111	Fig. 3D, Table S2A
F5149	54	MD then RO	0.2	265.928	Figs. 3B-D, Table S2A
F5149	54	MD then RO	0.4	153.832	Fig. 3D, Table S2A
F5149	61	MD then RO	0.05	176.695	Table S2A
F5149	61	MD then RO	0.2	213.404	Figs. 3B-C, Table S2A
F5149	61	MD then RO	0.4	95.557	Table S2A
F5149	68	MD then RO	0.05	163.868	Table S2A
F5149	68	MD then RO	0.2	245.783	Figs. 3B-C, Table S2A
F5149	68	MD then RO	0.4	89.1824	Table S2A
F5149	75	MD then RO	0.05	149.901	Fig. 3D, Table S2A
F5149	75	MD then RO	0.2	149.062	Figs. 3B-D, Table S2A
F5149	75	MD then RO	0.4	79.7338	Fig. 3D, Table S2A
F5150	47	MD then RO	0.05	58.0563	Fig. 3D, Table S2A
F5150	47	MD then RO	0.2	49.939	Figs. 3B-D, Table S2A
F5150	47	MD then RO	0.4	28.9235	Fig. 3D, Table S2A
F5150	54	MD then RO	0.05	166.252	Fig. 3D, Table S2A
F5150	54	MD then RO	0.2	181.303	Figs. 3B-D, Table S2A
F5150	54	MD then RO	0.4	42.52	Fig. 3D, Table S2A
F5150	61	MD then RO	0.05	142.717	Table S2A
F5150	61	MD then RO	0.2	158.169	Figs. 3B-C, Table S2A
F5150	61	MD then RO	0.4	18.2818	Table S2A
F5150	68	MD then RO	0.05	78.7626	Table S2A
F5150	68	MD then RO	0.2	93.6164	Figs. 3B-C, Table S2A
F5150	68	MD then RO	0.4	45.1345	Table S2A
F5150	75	MD then RO	0.05	67.3051	Fig. 3D, Table S2A
F5150	75	MD then RO	0.2	81.1308	Figs. 3B-D, Table S2A
F5150	75	MD then RO	0.4	35.9534	Fig. 3D, Table S2A
F5151	47	MD then TTX	0.05	8.31873	Fig. 3D, Table S2A
F5151	47	MD then TTX	0.2	60.5382	Figs. 3B-D, Table S2A
F5151	47	MD then TTX	0.4	18.8964	Fig. 3D, Table S2A
F5151	54	MD then TTX	0.05	109.385	Fig. 3D, Table S2A
F5151	54	MD then TTX	0.2	91.1557	Figs. 3B-D, Table S2A
F5151	54	MD then TTX	0.4	38.6737	Fig. 3D, Table S2A
F5151	61	MD then TTX	0.05	79.4649	Table S2A
F5151	61	MD then TTX	0.2	102.176	Figs. 3B-C, Table S2A
F5151	61	MD then TTX	0.4	45.3902	Table S2A
F5151	68	MD then TTX	0.05	81.8551	Table S2A
F5151	68	MD then TTX	0.2	162.591	Figs. 3B-C, Table S2A
F5151	68	MD then TTX	0.4	92.8609	Table S2A
F5151	75	MD then TTX	0.05	124.547	Fig. 3D, Table S2A
F5151	75	MD then TTX	0.2	178.487	Figs. 3B-D, Table S2A
F5151	75	MD then TTX	0.4	87.9828	Fig. 3D, Table S2A
Q3978	47	MD then TTX	0.05	175.302	Fig. 3D, Table S2A
Q3978	47	MD then TTX	0.2	257.361	Figs. 3B-D, Table S2A
Q3978	47	MD then TTX	0.4	83.6158	Fig. 3D, Table S2A
Q3978	54	MD then TTX	0.05	204.569	Fig. 3D, Table S2A
Q3978	54	MD then TTX	0.2	308.991	Figs. 3B-D, Table S2A
Q3978	54	MD then TTX	0.4	90.5185	Fig. 3D, Table S2A
Q3978	61	MD then TTX	0.05	295.647	Table S2A
Q3978	61	MD then TTX	0.2	308.738	Figs. 3B-C, Table S2A
Q3978	61	MD then TTX	0.4	162.929	Table S2A
Q3978	68	MD then TTX	0.05	59.4389	Table S2A
Q3978	68	MD then TTX	0.2	160.488	Figs. 3B-C, Table S2A
Q3978	68	MD then TTX	0.4	117.093	Table S2A
Q3978	75	MD then TTX	0.05	205.204	Fig. 3D, Table S2A
Q3978	75	MD then TTX	0.2	258.069	Figs. 3B-D, Table S2A
Q3978	75	MD then TTX	0.4	174.373	Fig. 3D, Table S2A
Q3982	47	MD then TTX	0.05	45.3577	Fig. 3D, Table S2A
Q3982	47	MD then TTX	0.2	16.7251	Figs. 3B-D, Table S2A
Q3982	47	MD then TTX	0.4	31.2649	Fig. 3D, Table S2A
Q3982	54	MD then TTX	0.05	69.2261	Fig. 3D, Table S2A
Q3982	54	MD then TTX	0.2	82.0222	Figs. 3B-D, Table S2A
Q3982	54	MD then TTX	0.4	19.0255	Fig. 3D, Table S2A
Q3982	61	MD then TTX	0.05	75.0026	Table S2A
Q3982	61	MD then TTX	0.2	55.3426	Figs. 3B-C, Table S2A
Q3982	61	MD then TTX	0.4	42.1242	Table S2A
Q3982	68	MD then TTX	0.05	130.21	Table S2A
Q3982	68	MD then TTX	0.2	142.567	Figs. 3B-C, Table S2A
Q3982	68	MD then TTX	0.4	22.3798	Table S2A
Q3982	75	MD then TTX	0.05	117.731	Fig. 3D, Table S2A
Q3982	75	MD then TTX	0.2	162.522	Figs. 3B-D, Table S2A
Q3982	75	MD then TTX	0.4	33.2454	Fig. 3D, Table S2A
Q3983	47	MD then RO	0.05	77.0308	Fig. 3D, Table S2A
Q3983	47	MD then RO	0.2	213.381	Figs. 3B-D, Table S2A
Q3983	47	MD then RO	0.4	55.6012	Fig. 3D, Table S2A
Q3983	54	MD then RO	0.05	53.311	Fig. 3D, Table S2A
Q3983	54	MD then RO	0.2	130.722	Figs. 3B-D, Table S2A
Q3983	54	MD then RO	0.4	135.577	Fig. 3D, Table S2A
Q3983	61	MD then RO	0.05	154.325	Table S2A
Q3983	61	MD then RO	0.2	142.434	Figs. 3B-C, Table S2A
Q3983	61	MD then RO	0.4	90.1001	Table S2A
Q3983	68	MD then RO	0.05	106.552	Table S2A
Q3983	68	MD then RO	0.2	149.549	Figs. 3B-C, Table S2A
Q3983	68	MD then RO	0.4	103.283	Table S2A
Q3983	75	MD then RO	0.05	108.296	Fig. 3D, Table S2A
Q3983	75	MD then RO	0.2	143.506	Figs. 3B-D, Table S2A
Q3983	75	MD then RO	0.4	97.7466	Fig. 3D, Table S2A
Q3984	47	MD then RO	0.05	95.7861	Fig. 3D, Table S2A
Q3984	47	MD then RO	0.2	214.48	Figs. 3B-D, Table S2A
Q3984	47	MD then RO	0.4	37.2759	Fig. 3D, Table S2A
Q3984	54	MD then RO	0.05	135.677	Fig. 3D, Table S2A
Q3984	54	MD then RO	0.2	226.399	Figs. 3B-D, Table S2A
Q3984	54	MD then RO	0.4	99.1675	Fig. 3D, Table S2A
Q3984	61	MD then RO	0.05	209.892	Table S2A
Q3984	61	MD then RO	0.2	210.712	Figs. 3B-C, Table S2A
Q3984	61	MD then RO	0.4	165.54	Table S2A
Q3984	68	MD then RO	0.05	154.802	Table S2A
Q3984	68	MD then RO	0.2	269.825	Figs. 3B-C, Table S2A
Q3984	68	MD then RO	0.4	180.119	Table S2A
Q3984	75	MD then RO	0.05	66.1463	Fig. 3D, Table S2A
Q3984	75	MD then RO	0.2	85.1913	Figs. 3B-D, Table S2A
Q3984	75	MD then RO	0.4	54.5276	Fig. 3D, Table S2A
R4052	47	MD then TTX	0.05	116.388	Fig. 3D, Table S2A
R4052	47	MD then TTX	0.2	36.915	Figs. 3B-D, Table S2A
R4052	47	MD then TTX	0.4	22.6017	Fig. 3D, Table S2A
R4052	54	MD then TTX	0.05	166.915	Fig. 3D, Table S2A
R4052	54	MD then TTX	0.2	111.797	Figs. 3B-D, Table S2A
R4052	54	MD then TTX	0.4	107.316	Fig. 3D, Table S2A
R4052	61	MD then TTX	0.05	104.988	Table S2A
R4052	61	MD then TTX	0.2	116.744	Figs. 3B-C, Table S2A
R4052	61	MD then TTX	0.4	99.3537	Table S2A
R4052	68	MD then TTX	0.05	156.901	Table S2A
R4052	68	MD then TTX	0.2	159.524	Figs. 3B-C, Table S2A
R4052	68	MD then TTX	0.4	101.268	Table S2A
R4052	75	MD then TTX	0.05	178.748	Fig. 3D, Table S2A
R4052	75	MD then TTX	0.2	297.71	Figs. 3B-D, Table S2A
R4052	75	MD then TTX	0.4	178.967	Fig. 3D, Table S2A
R4056	47	MD then RO	0.05	117.15	Fig. 3D, Table S2A
R4056	47	MD then RO	0.2	141.918	Figs. 3B-D, Table S2A
R4056	47	MD then RO	0.4	110.557	Fig. 3D, Table S2A
R4056	54	MD then RO	0.05	252.782	Fig. 3D, Table S2A
R4056	54	MD then RO	0.2	199.192	Figs. 3B-D, Table S2A
R4056	54	MD then RO	0.4	155.31	Fig. 3D, Table S2A
R4056	61	MD then RO	0.05	101.799	Table S2A
R4056	61	MD then RO	0.2	78.1042	Figs. 3B-C, Table S2A
R4056	61	MD then RO	0.4	78.3781	Table S2A
R4056	68	MD then RO	0.05	26.4142	Table S2A
R4056	68	MD then RO	0.2	26.6825	Figs. 3B-C, Table S2A
R4056	68	MD then RO	0.4	9.11614	Table S2A
R4056	75	MD then RO	0.05	12.3732	Fig. 3D, Table S2A
R4056	75	MD then RO	0.2	32.739	Figs. 3B-D, Table S2A
R4056	75	MD then RO	0.4	23.7481	Fig. 3D, Table S2A
S4075	47	MD then RO	0.05	86.1719	Fig. 3D, Table S2A
S4075	47	MD then RO	0.2	150.53	Figs. 3B-D, Table S2A
S4075	47	MD then RO	0.4	37.5741	Fig. 3D, Table S2A
S4075	54	MD then RO	0.05	131.575	Fig. 3D, Table S2A
S4075	54	MD then RO	0.2	192.403	Figs. 3B-D, Table S2A
S4075	54	MD then RO	0.4	80.4624	Fig. 3D, Table S2A
S4075	61	MD then RO	0.05	113.11	Table S2A
S4075	61	MD then RO	0.2	217.859	Figs. 3B-C, Table S2A
S4075	61	MD then RO	0.4	55.9903	Table S2A
S4075	68	MD then RO	0.05	116.883	Table S2A
S4075	68	MD then RO	0.2	147.114	Figs. 3B-C, Table S2A
S4075	68	MD then RO	0.4	37.0741	Table S2A
S4075	75	MD then RO	0.05	117.898	Fig. 3D, Table S2A
S4075	75	MD then RO	0.2	165.682	Figs. 3B-D, Table S2A
S4075	75	MD then RO	0.4	76.0331	Fig. 3D, Table S2A
S4076	47	MD then TTX	0.05	34.235	Fig. 3D, Table S2A
S4076	47	MD then TTX	0.2	48.4986	Figs. 3B-D, Table S2A
S4076	47	MD then TTX	0.4	12.8606	Fig. 3D, Table S2A
S4076	54	MD then TTX	0.05	56.739	Fig. 3D, Table S2A
S4076	54	MD then TTX	0.2	68.0451	Figs. 3B-D, Table S2A
S4076	54	MD then TTX	0.4	12.3104	Fig. 3D, Table S2A
S4076	61	MD then TTX	0.05	41.2166	Table S2A
S4076	61	MD then TTX	0.2	75.2937	Figs. 3B-C, Table S2A
S4076	61	MD then TTX	0.4	27.8883	Table S2A
S4076	68	MD then TTX	0.05	71.24	Table S2A
S4076	68	MD then TTX	0.2	69.5887	Figs. 3B-C, Table S2A
S4076	68	MD then TTX	0.4	29.6635	Table S2A
S4076	75	MD then TTX	0.05	62.5846	Fig. 3D, Table S2A
S4076	75	MD then TTX	0.2	64.7367	Figs. 3B-D, Table S2A
S4076	75	MD then TTX	0.4	19.7507	Fig. 3D, Table S2A
S4077	47	MD then RO	0.05	73.2115	Fig. 3D, Table S2A
S4077	47	MD then RO	0.2	101.644	Figs. 3B-D, Table S2A
S4077	47	MD then RO	0.4	40.3651	Fig. 3D, Table S2A
S4077	54	MD then RO	0.05	144.524	Fig. 3D, Table S2A
S4077	54	MD then RO	0.2	194.58	Figs. 3B-D, Table S2A
S4077	54	MD then RO	0.4	130.154	Fig. 3D, Table S2A
S4077	61	MD then RO	0.05	144.574	Table S2A
S4077	61	MD then RO	0.2	143.039	Figs. 3B-C, Table S2A
S4077	61	MD then RO	0.4	51.9922	Table S2A
S4077	68	MD then RO	0.05	107.595	Table S2A
S4077	68	MD then RO	0.2	142.144	Figs. 3B-C, Table S2A
S4077	68	MD then RO	0.4	82.9291	Table S2A
S4077	75	MD then RO	0.05	89.2784	Fig. 3D, Table S2A
S4077	75	MD then RO	0.2	95.1973	Figs. 3B-D, Table S2A
S4077	75	MD then RO	0.4	76.9422	Fig. 3D, Table S2A
S4079	47	MD then TTX	0.05	70.1104	Fig. 3D, Table S2A
S4079	47	MD then TTX	0.2	80.6797	Figs. 3B-D, Table S2A
S4079	47	MD then TTX	0.4	40.3361	Fig. 3D, Table S2A
S4079	54	MD then TTX	0.05	223.411	Fig. 3D, Table S2A
S4079	54	MD then TTX	0.2	275.5	Figs. 3B-D, Table S2A
S4079	54	MD then TTX	0.4	170.941	Fig. 3D, Table S2A
S4079	61	MD then TTX	0.05	190.094	Table S2A
S4079	61	MD then TTX	0.2	247.359	Figs. 3B-C, Table S2A
S4079	61	MD then TTX	0.4	132.783	Table S2A
S4079	68	MD then TTX	0.05	117.863	Table S2A
S4079	68	MD then TTX	0.2	181.756	Figs. 3B-C, Table S2A
S4079	68	MD then TTX	0.4	122.613	Table S2A
S4079	75	MD then TTX	0.05	174.263	Fig. 3D, Table S2A
S4079	75	MD then TTX	0.2	247.579	Figs. 3B-D, Table S2A
S4079	75	MD then TTX	0.4	117.497	Fig. 3D, Table S2A
W4463	47	MD then TTX	0.05	62.7013	Fig. 3D, Table S2A
W4463	47	MD then TTX	0.2	137.537	Figs. 3B-D, Table S2A
W4463	47	MD then TTX	0.4	36.7699	Fig. 3D, Table S2A
W4463	54	MD then TTX	0.05	107.414	Fig. 3D, Table S2A
W4463	54	MD then TTX	0.2	167.219	Figs. 3B-D, Table S2A
W4463	54	MD then TTX	0.4	64.0273	Fig. 3D, Table S2A
W4463	61	MD then TTX	0.05	111.946	Table S2A
W4463	61	MD then TTX	0.2	104.786	Figs. 3B-C, Table S2A
W4463	61	MD then TTX	0.4	134.733	Table S2A
W4463	68	MD then TTX	0.05	133.409	Table S2A
W4463	68	MD then TTX	0.2	142.529	Figs. 3B-C, Table S2A
W4463	68	MD then TTX	0.4	93.397	Table S2A
W4463	75	MD then TTX	0.05	116.227	Fig. 3D, Table S2A
W4463	75	MD then TTX	0.2	157.564	Figs. 3B-D, Table S2A
W4463	75	MD then TTX	0.4	107.984	Fig. 3D, Table S2A
W4466	47	MD then TTX	0.05	68.3043	Fig. 3D, Table S2A
W4466	47	MD then TTX	0.2	36.3679	Figs. 3B-D, Table S2A
W4466	47	MD then TTX	0.4	17.1042	Fig. 3D, Table S2A
W4466	54	MD then TTX	0.05	107.108	Fig. 3D, Table S2A
W4466	54	MD then TTX	0.2	163.588	Figs. 3B-D, Table S2A
W4466	54	MD then TTX	0.4	93.1643	Fig. 3D, Table S2A
W4466	61	MD then TTX	0.05	167.465	Table S2A
W4466	61	MD then TTX	0.2	199.201	Figs. 3B-C, Table S2A
W4466	61	MD then TTX	0.4	103.343	Table S2A
W4466	68	MD then TTX	0.05	147.316	Table S2A
W4466	68	MD then TTX	0.2	161.941	Figs. 3B-C, Table S2A
W4466	68	MD then TTX	0.4	117.923	Table S2A
W4466	75	MD then TTX	0.05	175.661	Fig. 3D, Table S2A
W4466	75	MD then TTX	0.2	228.511	Figs. 3B-D, Table S2A
W4466	75	MD then TTX	0.4	110.958	Fig. 3D, Table S2A
W4467	47	MD then RO	0.05	71.9061	Fig. 3D, Table S2A
W4467	47	MD then RO	0.2	129.37	Figs. 3B-D, Table S2A
W4467	47	MD then RO	0.4	17.4698	Fig. 3D, Table S2A
W4467	54	MD then RO	0.05	75.3559	Fig. 3D, Table S2A
W4467	54	MD then RO	0.2	144.818	Figs. 3B-D, Table S2A
W4467	54	MD then RO	0.4	128.641	Fig. 3D, Table S2A
W4467	61	MD then RO	0.05	155.08	Table S2A
W4467	61	MD then RO	0.2	177.924	Figs. 3B-C, Table S2A
W4467	61	MD then RO	0.4	83.9572	Table S2A
W4467	68	MD then RO	0.05	115.714	Table S2A
W4467	68	MD then RO	0.2	194.399	Figs. 3B-C, Table S2A
W4467	68	MD then RO	0.4	141.257	Table S2A
W4467	75	MD then RO	0.05	156.655	Fig. 3D, Table S2A
W4467	75	MD then RO	0.2	190.26	Figs. 3B-D, Table S2A
W4467	75	MD then RO	0.4	138.791	Fig. 3D, Table S2A
W4469	47	MD then TTX	0.05	113.603	Fig. 3D, Table S2A
W4469	47	MD then TTX	0.2	101.168	Figs. 3B-D, Table S2A
W4469	47	MD then TTX	0.4	56.0985	Fig. 3D, Table S2A
W4469	54	MD then TTX	0.05	226.615	Fig. 3D, Table S2A
W4469	54	MD then TTX	0.2	150.812	Figs. 3B-D, Table S2A
W4469	54	MD then TTX	0.4	66.1963	Fig. 3D, Table S2A
W4469	61	MD then TTX	0.05	171.313	Table S2A
W4469	61	MD then TTX	0.2	132.903	Figs. 3B-C, Table S2A
W4469	61	MD then TTX	0.4	116.204	Table S2A
W4469	68	MD then TTX	0.05	179.016	Table S2A
W4469	68	MD then TTX	0.2	105.084	Figs. 3B-C, Table S2A
W4469	68	MD then TTX	0.4	74.7505	Table S2A
W4469	75	MD then TTX	0.05	162.146	Fig. 3D, Table S2A
W4469	75	MD then TTX	0.2	142.909	Figs. 3B-D, Table S2A
W4469	75	MD then TTX	0.4	76.2336	Fig. 3D, Table S2A
W4470	47	MD then RO	0.05	31.7882	Fig. 3D, Table S2A
W4470	47	MD then RO	0.2	68.5446	Figs. 3B-D, Table S2A
W4470	47	MD then RO	0.4	13.2519	Fig. 3D, Table S2A
W4470	54	MD then RO	0.05	119.172	Fig. 3D, Table S2A
W4470	54	MD then RO	0.2	150.01	Figs. 3B-D, Table S2A
W4470	54	MD then RO	0.4	63.2173	Fig. 3D, Table S2A
W4470	61	MD then RO	0.05	112.145	Table S2A
W4470	61	MD then RO	0.2	127.137	Figs. 3B-C, Table S2A
W4470	61	MD then RO	0.4	72.7897	Table S2A
W4470	68	MD then RO	0.05	90.0314	Table S2A
W4470	68	MD then RO	0.2	159.277	Figs. 3B-C, Table S2A
W4470	68	MD then RO	0.4	46.1984	Table S2A
W4470	75	MD then RO	0.05	90.9507	Fig. 3D, Table S2A
W4470	75	MD then RO	0.2	131.017	Figs. 3B-D, Table S2A
W4470	75	MD then RO	0.4	83.2148	Fig. 3D, Table S2A
W4471	47	MD then RO	0.05	57.7593	Fig. 3D, Table S2A
W4471	47	MD then RO	0.2	62.1534	Figs. 3B-D, Table S2A
W4471	47	MD then RO	0.4	47.9864	Fig. 3D, Table S2A
W4471	54	MD then RO	0.05	105.908	Fig. 3D, Table S2A
W4471	54	MD then RO	0.2	127.452	Figs. 3B-D, Table S2A
W4471	54	MD then RO	0.4	28.4661	Fig. 3D, Table S2A
W4471	61	MD then RO	0.05	117.834	Table S2A
W4471	61	MD then RO	0.2	131.838	Figs. 3B-C, Table S2A
W4471	61	MD then RO	0.4	67.1907	Table S2A
W4471	68	MD then RO	0.05	105.722	Table S2A
W4471	68	MD then RO	0.2	134.817	Figs. 3B-C, Table S2A
W4471	68	MD then RO	0.4	40.0447	Table S2A
W4471	75	MD then RO	0.05	87.188	Fig. 3D, Table S2A
W4471	75	MD then RO	0.2	89.1483	Figs. 3B-D, Table S2A
W4471	75	MD then RO	0.4	50.1536	Fig. 3D, Table S2A
W4472	47	MD then TTX	0.05	127.393	Fig. 3D, Table S2A
W4472	47	MD then TTX	0.2	140.977	Figs. 3B-D, Table S2A
W4472	47	MD then TTX	0.4	61.0316	Fig. 3D, Table S2A
W4472	54	MD then TTX	0.05	154.075	Fig. 3D, Table S2A
W4472	54	MD then TTX	0.2	170.68	Figs. 3B-D, Table S2A
W4472	54	MD then TTX	0.4	92.2352	Fig. 3D, Table S2A
W4472	61	MD then TTX	0.05	193.409	Table S2A
W4472	61	MD then TTX	0.2	206.24	Figs. 3B-C, Table S2A
W4472	61	MD then TTX	0.4	191.386	Table S2A
W4472	68	MD then TTX	0.05	215.117	Table S2A
W4472	68	MD then TTX	0.2	236.565	Figs. 3B-C, Table S2A
W4472	68	MD then TTX	0.4	163.031	Table S2A
W4472	75	MD then TTX	0.05	192.577	Fig. 3D, Table S2A
W4472	75	MD then TTX	0.2	228.52	Figs. 3B-D, Table S2A
W4472	75	MD then TTX	0.4	141.305	Fig. 3D, Table S2A

## Sheet: ipsilateral eye
Animal ID	Postnatal age (days)	Treatment	Spatial frequency (cpd)	VEP magnitude (uV)	Associated figure/table
E5060	47	MD then RO	0.05	108.148	Fig. 3G, Table S2B
E5060	47	MD then RO	0.2	44.9604	Figs. 3E-G, Table S2B
E5060	47	MD then RO	0.4	21.741	Fig. 3G, Table S2B
E5060	54	MD then RO	0.05	34.3459	Fig. 3G, Table S2B
E5060	54	MD then RO	0.2	11.691	Figs. 3E-G, Table S2B
E5060	54	MD then RO	0.4	16.1096	Fig. 3G, Table S2B
E5060	61	MD then RO	0.05	17.9894	Table S2B
E5060	61	MD then RO	0.2	7.3329	Figs. 3E-F, Table S2B
E5060	61	MD then RO	0.4	4.16148	Table S2B
E5060	68	MD then RO	0.05	28.1154	Table S2B
E5060	68	MD then RO	0.2	22.2511	Figs. 3E-F, Table S2B
E5060	68	MD then RO	0.4	5.01933	Table S2B
E5060	75	MD then RO	0.05	24.3899	Fig. 3G, Table S2B
E5060	75	MD then RO	0.2	23.5053	Figs. 3E-G, Table S2B
E5060	75	MD then RO	0.4	24.1445	Fig. 3G, Table S2B
E5064	47	MD then RO	0.05	183.225	Fig. 3G, Table S2B
E5064	47	MD then RO	0.2	178.574	Figs. 3E-G, Table S2B
E5064	47	MD then RO	0.4	75.312	Fig. 3G, Table S2B
E5064	54	MD then RO	0.05	70.5117	Fig. 3G, Table S2B
E5064	54	MD then RO	0.2	20.2039	Figs. 3E-G, Table S2B
E5064	54	MD then RO	0.4	31.3166	Fig. 3G, Table S2B
E5064	61	MD then RO	0.05	11.8918	Table S2B
E5064	61	MD then RO	0.2	6.83562	Figs. 3E-F, Table S2B
E5064	61	MD then RO	0.4	12.5054	Table S2B
E5064	68	MD then RO	0.05	14.6737	Table S2B
E5064	68	MD then RO	0.2	11.3314	Figs. 3E-F, Table S2B
E5064	68	MD then RO	0.4	7.11035	Table S2B
E5064	75	MD then RO	0.05	7.39092	Fig. 3G, Table S2B
E5064	75	MD then RO	0.2	6.69057	Figs. 3E-G, Table S2B
E5064	75	MD then RO	0.4	10.3445	Fig. 3G, Table S2B
E5067	47	MD then RO	0.05	213.181	Fig. 3G, Table S2B
E5067	47	MD then RO	0.2	107.28	Figs. 3E-G, Table S2B
E5067	47	MD then RO	0.4	46.3016	Fig. 3G, Table S2B
E5067	54	MD then RO	0.05	139.649	Fig. 3G, Table S2B
E5067	54	MD then RO	0.2	53.7406	Figs. 3E-G, Table S2B
E5067	54	MD then RO	0.4	59.2358	Fig. 3G, Table S2B
E5067	61	MD then RO	0.05	205.729	Table S2B
E5067	61	MD then RO	0.2	101.93	Figs. 3E-F, Table S2B
E5067	61	MD then RO	0.4	50.1847	Table S2B
E5067	68	MD then RO	0.05	227.251	Table S2B
E5067	68	MD then RO	0.2	72.5003	Figs. 3E-F, Table S2B
E5067	68	MD then RO	0.4	34.5227	Table S2B
E5067	75	MD then RO	0.05	143.5	Fig. 3G, Table S2B
E5067	75	MD then RO	0.2	66.6417	Figs. 3E-G, Table S2B
E5067	75	MD then RO	0.4	56.1243	Fig. 3G, Table S2B
E5069	47	MD then RO	0.05	93.2648	Fig. 3G, Table S2B
E5069	47	MD then RO	0.2	137.504	Figs. 3E-G, Table S2B
E5069	47	MD then RO	0.4	93.1794	Fig. 3G, Table S2B
E5069	54	MD then RO	0.05	104.227	Fig. 3G, Table S2B
E5069	54	MD then RO	0.2	20.3831	Figs. 3E-G, Table S2B
E5069	54	MD then RO	0.4	4.5319	Fig. 3G, Table S2B
E5069	61	MD then RO	0.05	18.4212	Table S2B
E5069	61	MD then RO	0.2	9.58772	Figs. 3E-F, Table S2B
E5069	61	MD then RO	0.4	6.74308	Table S2B
E5069	68	MD then RO	0.05	17.5278	Table S2B
E5069	68	MD then RO	0.2	5.29628	Figs. 3E-F, Table S2B
E5069	68	MD then RO	0.4	10.3186	Table S2B
E5069	75	MD then RO	0.05	12.5298	Fig. 3G, Table S2B
E5069	75	MD then RO	0.2	14.5621	Figs. 3E-G, Table S2B
E5069	75	MD then RO	0.4	6.49925	Fig. 3G, Table S2B
F5148	47	MD then RO	0.05	55.5333	Fig. 3G, Table S2B
F5148	47	MD then RO	0.2	56.1371	Figs. 3E-G, Table S2B
F5148	47	MD then RO	0.4	28.5813	Fig. 3G, Table S2B
F5148	54	MD then RO	0.05	28.3528	Fig. 3G, Table S2B
F5148	54	MD then RO	0.2	29.4465	Figs. 3E-G, Table S2B
F5148	54	MD then RO	0.4	20.9114	Fig. 3G, Table S2B
F5148	61	MD then RO	0.05	45.5031	Table S2B
F5148	61	MD then RO	0.2	28.0777	Figs. 3E-F, Table S2B
F5148	61	MD then RO	0.4	5.46555	Table S2B
F5148	68	MD then RO	0.05	12.9166	Table S2B
F5148	68	MD then RO	0.2	25.7331	Figs. 3E-F, Table S2B
F5148	68	MD then RO	0.4	9.92136	Table S2B
F5148	75	MD then RO	0.05	20.1293	Fig. 3G, Table S2B
F5148	75	MD then RO	0.2	9.28527	Figs. 3E-G, Table S2B
F5148	75	MD then RO	0.4	15.4544	Fig. 3G, Table S2B
F5149	47	MD then RO	0.05	124.051	Fig. 3G, Table S2B
F5149	47	MD then RO	0.2	138.761	Figs. 3E-G, Table S2B
F5149	47	MD then RO	0.4	76.5434	Fig. 3G, Table S2B
F5149	54	MD then RO	0.05	125.912	Fig. 3G, Table S2B
F5149	54	MD then RO	0.2	67.1469	Figs. 3E-G, Table S2B
F5149	54	MD then RO	0.4	47.3524	Fig. 3G, Table S2B
F5149	61	MD then RO	0.05	103.23	Table S2B
F5149	61	MD then RO	0.2	138.825	Figs. 3E-F, Table S2B
F5149	61	MD then RO	0.4	66.2896	Table S2B
F5149	68	MD then RO	0.05	84.5629	Table S2B
F5149	68	MD then RO	0.2	91.5746	Figs. 3E-F, Table S2B
F5149	68	MD then RO	0.4	50.885	Table S2B
F5149	75	MD then RO	0.05	48.4412	Fig. 3G, Table S2B
F5149	75	MD then RO	0.2	46.8279	Figs. 3E-G, Table S2B
F5149	75	MD then RO	0.4	30.0315	Fig. 3G, Table S2B
F5150	47	MD then RO	0.05	69.4381	Fig. 3G, Table S2B
F5150	47	MD then RO	0.2	72.7683	Figs. 3E-G, Table S2B
F5150	47	MD then RO	0.4	42.2279	Fig. 3G, Table S2B
F5150	54	MD then RO	0.05	79.7132	Fig. 3G, Table S2B
F5150	54	MD then RO	0.2	57.5736	Figs. 3E-G, Table S2B
F5150	54	MD then RO	0.4	30.9776	Fig. 3G, Table S2B
F5150	61	MD then RO	0.05	63.1886	Table S2B
F5150	61	MD then RO	0.2	43.3302	Figs. 3E-F, Table S2B
F5150	61	MD then RO	0.4	22.598	Table S2B
F5150	68	MD then RO	0.05	47.1336	Table S2B
F5150	68	MD then RO	0.2	7.66269	Figs. 3E-F, Table S2B
F5150	68	MD then RO	0.4	19.917	Table S2B
F5150	75	MD then RO	0.05	15.0448	Fig. 3G, Table S2B
F5150	75	MD then RO	0.2	26.2191	Figs. 3E-G, Table S2B
F5150	75	MD then RO	0.4	13.1098	Fig. 3G, Table S2B
Q3983	47	MD then RO	0.05	57.8461	Fig. 3G, Table S2B
Q3983	47	MD then RO	0.2	81.0809	Figs. 3E-G, Table S2B
Q3983	47	MD then RO	0.4	49.6297	Fig. 3G, Table S2B
Q3983	54	MD then RO	0.05	26.5825	Fig. 3G, Table S2B
Q3983	54	MD then RO	0.2	87.3589	Figs. 3E-G, Table S2B
Q3983	54	MD then RO	0.4	70.0731	Fig. 3G, Table S2B
Q3983	61	MD then RO	0.05	79.6452	Table S2B
Q3983	61	MD then RO	0.2	88.4754	Figs. 3E-F, Table S2B
Q3983	61	MD then RO	0.4	38.0056	Table S2B
Q3983	68	MD then RO	0.05	81.7766	Table S2B
Q3983	68	MD then RO	0.2	79.8255	Figs. 3E-F, Table S2B
Q3983	68	MD then RO	0.4	57.3542	Table S2B
Q3983	75	MD then RO	0.05	57.5692	Fig. 3G, Table S2B
Q3983	75	MD then RO	0.2	88.0535	Figs. 3E-G, Table S2B
Q3983	75	MD then RO	0.4	52.8512	Fig. 3G, Table S2B
Q3984	47	MD then RO	0.05	91.1163	Fig. 3G, Table S2B
Q3984	47	MD then RO	0.2	125.729	Figs. 3E-G, Table S2B
Q3984	47	MD then RO	0.4	101.154	Fig. 3G, Table S2B
Q3984	54	MD then RO	0.05	88.7475	Fig. 3G, Table S2B
Q3984	54	MD then RO	0.2	81.9002	Figs. 3E-G, Table S2B
Q3984	54	MD then RO	0.4	52.5271	Fig. 3G, Table S2B
Q3984	61	MD then RO	0.05	180.414	Table S2B
Q3984	61	MD then RO	0.2	98.6574	Figs. 3E-F, Table S2B
Q3984	61	MD then RO	0.4	47.8491	Table S2B
Q3984	68	MD then RO	0.05	125.919	Table S2B
Q3984	68	MD then RO	0.2	62.3549	Figs. 3E-F, Table S2B
Q3984	68	MD then RO	0.4	24.8729	Table S2B
Q3984	75	MD then RO	0.05	42.4819	Fig. 3G, Table S2B
Q3984	75	MD then RO	0.2	19.1749	Figs. 3E-G, Table S2B
Q3984	75	MD then RO	0.4	15.1191	Fig. 3G, Table S2B
R4056	47	MD then RO	0.05	124.031	Fig. 3G, Table S2B
R4056	47	MD then RO	0.2	172.995	Figs. 3E-G, Table S2B
R4056	47	MD then RO	0.4	116.032	Fig. 3G, Table S2B
R4056	54	MD then RO	0.05	366.293	Fig. 3G, Table S2B
R4056	54	MD then RO	0.2	231.97	Figs. 3E-G, Table S2B
R4056	54	MD then RO	0.4	24.1598	Fig. 3G, Table S2B
R4056	61	MD then RO	0.05	25.5689	Table S2B
R4056	61	MD then RO	0.2	31.442	Figs. 3E-F, Table S2B
R4056	61	MD then RO	0.4	9.89594	Table S2B
R4056	68	MD then RO	0.05	31.523	Table S2B
R4056	68	MD then RO	0.2	11.1822	Figs. 3E-F, Table S2B
R4056	68	MD then RO	0.4	13.2006	Table S2B
R4056	75	MD then RO	0.05	16.0508	Fig. 3G, Table S2B
R4056	75	MD then RO	0.2	5.98262	Figs. 3E-G, Table S2B
R4056	75	MD then RO	0.4	6.62023	Fig. 3G, Table S2B
S4075	47	MD then RO	0.05	82.3461	Fig. 3G, Table S2B
S4075	47	MD then RO	0.2	96.453	Figs. 3E-G, Table S2B
S4075	47	MD then RO	0.4	60.9629	Fig. 3G, Table S2B
S4075	54	MD then RO	0.05	75.2985	Fig. 3G, Table S2B
S4075	54	MD then RO	0.2	53.0368	Figs. 3E-G, Table S2B
S4075	54	MD then RO	0.4	21.8113	Fig. 3G, Table S2B
S4075	61	MD then RO	0.05	94.0719	Table S2B
S4075	61	MD then RO	0.2	83.056	Figs. 3E-F, Table S2B
S4075	61	MD then RO	0.4	35.5853	Table S2B
S4075	68	MD then RO	0.05	66.8351	Table S2B
S4075	68	MD then RO	0.2	58.066	Figs. 3E-F, Table S2B
S4075	68	MD then RO	0.4	7.91748	Table S2B
S4075	75	MD then RO	0.05	70.0414	Fig. 3G, Table S2B
S4075	75	MD then RO	0.2	66.7813	Figs. 3E-G, Table S2B
S4075	75	MD then RO	0.4	38.9145	Fig. 3G, Table S2B
S4077	47	MD then RO	0.05	65.1338	Fig. 3G, Table S2B
S4077	47	MD then RO	0.2	81.6962	Figs. 3E-G, Table S2B
S4077	47	MD then RO	0.4	46.2378	Fig. 3G, Table S2B
S4077	54	MD then RO	0.05	54.9908	Fig. 3G, Table S2B
S4077	54	MD then RO	0.2	18.0019	Figs. 3E-G, Table S2B
S4077	54	MD then RO	0.4	24.4078	Fig. 3G, Table S2B
S4077	61	MD then RO	0.05	51.2717	Table S2B
S4077	61	MD then RO	0.2	12.2241	Figs. 3E-F, Table S2B
S4077	61	MD then RO	0.4	10.174	Table S2B
S4077	68	MD then RO	0.05	21.2627	Table S2B
S4077	68	MD then RO	0.2	18.3111	Figs. 3E-F, Table S2B
S4077	68	MD then RO	0.4	6.71704	Table S2B
S4077	75	MD then RO	0.05	30.1445	Fig. 3G, Table S2B
S4077	75	MD then RO	0.2	14.4515	Figs. 3E-G, Table S2B
S4077	75	MD then RO	0.4	12.9903	Fig. 3G, Table S2B
W4467	47	MD then RO	0.05	52.427	Fig. 3G, Table S2B
W4467	47	MD then RO	0.2	66.4323	Figs. 3E-G, Table S2B
W4467	47	MD then RO	0.4	29.7621	Fig. 3G, Table S2B
W4467	54	MD then RO	0.05	36.7399	Fig. 3G, Table S2B
W4467	54	MD then RO	0.2	31.2694	Figs. 3E-G, Table S2B
W4467	54	MD then RO	0.4	13.1384	Fig. 3G, Table S2B
W4467	61	MD then RO	0.05	49.3195	Table S2B
W4467	61	MD then RO	0.2	26.26	Figs. 3E-F, Table S2B
W4467	61	MD then RO	0.4	12.5149	Table S2B
W4467	68	MD then RO	0.05	28.7369	Table S2B
W4467	68	MD then RO	0.2	25.9309	Figs. 3E-F, Table S2B
W4467	68	MD then RO	0.4	7.39303	Table S2B
W4467	75	MD then RO	0.05	25.9005	Fig. 3G, Table S2B
W4467	75	MD then RO	0.2	12.376	Figs. 3E-G, Table S2B
W4467	75	MD then RO	0.4	18.902	Fig. 3G, Table S2B
W4470	47	MD then RO	0.05	69.9125	Fig. 3G, Table S2B
W4470	47	MD then RO	0.2	41.3553	Figs. 3E-G, Table S2B
W4470	47	MD then RO	0.4	43.1633	Fig. 3G, Table S2B
W4470	54	MD then RO	0.05	28.1712	Fig. 3G, Table S2B
W4470	54	MD then RO	0.2	7.0153	Figs. 3E-G, Table S2B
W4470	54	MD then RO	0.4	44.1562	Fig. 3G, Table S2B
W4470	61	MD then RO	0.05	69.9151	Table S2B
W4470	61	MD then RO	0.2	53.0488	Figs. 3E-F, Table S2B
W4470	61	MD then RO	0.4	22.4094	Table S2B
W4470	68	MD then RO	0.05	46.9085	Table S2B
W4470	68	MD then RO	0.2	52.4108	Figs. 3E-F, Table S2B
W4470	68	MD then RO	0.4	20.5751	Table S2B
W4470	75	MD then RO	0.05	52.3286	Fig. 3G, Table S2B
W4470	75	MD then RO	0.2	44.662	Figs. 3E-G, Table S2B
W4470	75	MD then RO	0.4	17.0094	Fig. 3G, Table S2B
W4471	47	MD then RO	0.05	65.2657	Fig. 3G, Table S2B
W4471	47	MD then RO	0.2	51.7211	Figs. 3E-G, Table S2B
W4471	47	MD then RO	0.4	20.6835	Fig. 3G, Table S2B
W4471	54	MD then RO	0.05	23.0101	Fig. 3G, Table S2B
W4471	54	MD then RO	0.2	17.7501	Figs. 3E-G, Table S2B
W4471	54	MD then RO	0.4	16.1484	Fig. 3G, Table S2B
W4471	61	MD then RO	0.05	50.5713	Table S2B
W4471	61	MD then RO	0.2	44.6623	Figs. 3E-F, Table S2B
W4471	61	MD then RO	0.4	23.4764	Table S2B
W4471	68	MD then RO	0.05	53.9974	Table S2B
W4471	68	MD then RO	0.2	37.7841	Figs. 3E-F, Table S2B
W4471	68	MD then RO	0.4	19.1203	Table S2B
W4471	75	MD then RO	0.05	62.8173	Fig. 3G, Table S2B
W4471	75	MD then RO	0.2	68.8721	Figs. 3E-G, Table S2B
W4471	75	MD then RO	0.4	23.1782	Fig. 3G, Table S2B
E5065	47	MD then TTX	0.05	139.858	Fig. 3G, Table S2B
E5065	47	MD then TTX	0.2	243.577	Figs. 3E-G, Table S2B
E5065	47	MD then TTX	0.4	137.234	Fig. 3G, Table S2B
E5065	54	MD then TTX	0.05	133.99	Fig. 3G, Table S2B
E5065	54	MD then TTX	0.2	88.1054	Figs. 3E-G, Table S2B
E5065	54	MD then TTX	0.4	69.5314	Fig. 3G, Table S2B
E5065	61	MD then TTX	0.05	112.759	Table S2B
E5065	61	MD then TTX	0.2	21.9795	Figs. 3E-F, Table S2B
E5065	61	MD then TTX	0.4	6.92085	Table S2B
E5065	68	MD then TTX	0.05	104.392	Table S2B
E5065	68	MD then TTX	0.2	100.369	Figs. 3E-F, Table S2B
E5065	68	MD then TTX	0.4	42.003	Table S2B
E5065	75	MD then TTX	0.05	101.398	Fig. 3G, Table S2B
E5065	75	MD then TTX	0.2	92.601	Figs. 3E-G, Table S2B
E5065	75	MD then TTX	0.4	31.7836	Fig. 3G, Table S2B
E5066	47	MD then TTX	0.05	162.872	Fig. 3G, Table S2B
E5066	47	MD then TTX	0.2	141.765	Figs. 3E-G, Table S2B
E5066	47	MD then TTX	0.4	49.222	Fig. 3G, Table S2B
E5066	54	MD then TTX	0.05	153.726	Fig. 3G, Table S2B
E5066	54	MD then TTX	0.2	76.6968	Figs. 3E-G, Table S2B
E5066	54	MD then TTX	0.4	35.4774	Fig. 3G, Table S2B
E5066	61	MD then TTX	0.05	80.1993	Table S2B
E5066	61	MD then TTX	0.2	91.1555	Figs. 3E-F, Table S2B
E5066	61	MD then TTX	0.4	32.679	Table S2B
E5066	68	MD then TTX	0.05	65.5417	Table S2B
E5066	68	MD then TTX	0.2	106.699	Figs. 3E-F, Table S2B
E5066	68	MD then TTX	0.4	18.0109	Table S2B
E5066	75	MD then TTX	0.05	47.6281	Fig. 3G, Table S2B
E5066	75	MD then TTX	0.2	59.9588	Figs. 3E-G, Table S2B
E5066	75	MD then TTX	0.4	39.3842	Fig. 3G, Table S2B
E5068	47	MD then TTX	0.05	144.177	Fig. 3G, Table S2B
E5068	47	MD then TTX	0.2	155.748	Figs. 3E-G, Table S2B
E5068	47	MD then TTX	0.4	69.9011	Fig. 3G, Table S2B
E5068	54	MD then TTX	0.05	115.164	Fig. 3G, Table S2B
E5068	54	MD then TTX	0.2	60.8774	Figs. 3E-G, Table S2B
E5068	54	MD then TTX	0.4	35.9719	Fig. 3G, Table S2B
E5068	61	MD then TTX	0.05	174.966	Table S2B
E5068	61	MD then TTX	0.2	159.768	Figs. 3E-F, Table S2B
E5068	61	MD then TTX	0.4	58.1023	Table S2B
E5068	68	MD then TTX	0.05	131.849	Table S2B
E5068	68	MD then TTX	0.2	113.991	Figs. 3E-F, Table S2B
E5068	68	MD then TTX	0.4	12.4897	Table S2B
E5068	75	MD then TTX	0.05	147.736	Fig. 3G, Table S2B
E5068	75	MD then TTX	0.2	137.421	Figs. 3E-G, Table S2B
E5068	75	MD then TTX	0.4	57.0144	Fig. 3G, Table S2B
F5147	47	MD then TTX	0.05	89.2132	Fig. 3G, Table S2B
F5147	47	MD then TTX	0.2	97.1994	Figs. 3E-G, Table S2B
F5147	47	MD then TTX	0.4	53.1767	Fig. 3G, Table S2B
F5147	54	MD then TTX	0.05	50.0845	Fig. 3G, Table S2B
F5147	54	MD then TTX	0.2	38.1801	Figs. 3E-G, Table S2B
F5147	54	MD then TTX	0.4	28.1001	Fig. 3G, Table S2B
F5147	61	MD then TTX	0.05	48.3334	Table S2B
F5147	61	MD then TTX	0.2	68.1521	Figs. 3E-F, Table S2B
F5147	61	MD then TTX	0.4	8.26519	Table S2B
F5147	68	MD then TTX	0.05	32.5097	Table S2B
F5147	68	MD then TTX	0.2	37.6852	Figs. 3E-F, Table S2B
F5147	68	MD then TTX	0.4	21.5758	Table S2B
F5147	75	MD then TTX	0.05	53.6944	Fig. 3G, Table S2B
F5147	75	MD then TTX	0.2	18.5534	Figs. 3E-G, Table S2B
F5147	75	MD then TTX	0.4	8.12319	Fig. 3G, Table S2B
F5151	47	MD then TTX	0.05	58.6283	Fig. 3G, Table S2B
F5151	47	MD then TTX	0.2	68.5873	Figs. 3E-G, Table S2B
F5151	47	MD then TTX	0.4	46.5804	Fig. 3G, Table S2B
F5151	54	MD then TTX	0.05	82.3642	Fig. 3G, Table S2B
F5151	54	MD then TTX	0.2	49.5743	Figs. 3E-G, Table S2B
F5151	54	MD then TTX	0.4	3.76296	Fig. 3G, Table S2B
F5151	61	MD then TTX	0.05	16.4437	Table S2B
F5151	61	MD then TTX	0.2	34.3617	Figs. 3E-F, Table S2B
F5151	61	MD then TTX	0.4	13.6045	Table S2B
F5151	68	MD then TTX	0.05	24.8644	Table S2B
F5151	68	MD then TTX	0.2	45.5067	Figs. 3E-F, Table S2B
F5151	68	MD then TTX	0.4	11.578	Table S2B
F5151	75	MD then TTX	0.05	33.6463	Fig. 3G, Table S2B
F5151	75	MD then TTX	0.2	48.5929	Figs. 3E-G, Table S2B
F5151	75	MD then TTX	0.4	8.72599	Fig. 3G, Table S2B
Q3978	47	MD then TTX	0.05	150.839	Fig. 3G, Table S2B
Q3978	47	MD then TTX	0.2	179.795	Figs. 3E-G, Table S2B
Q3978	47	MD then TTX	0.4	149.204	Fig. 3G, Table S2B
Q3978	54	MD then TTX	0.05	109.245	Fig. 3G, Table S2B
Q3978	54	MD then TTX	0.2	99.8222	Figs. 3E-G, Table S2B
Q3978	54	MD then TTX	0.4	70.8544	Fig. 3G, Table S2B
Q3978	61	MD then TTX	0.05	138.828	Table S2B
Q3978	61	MD then TTX	0.2	152.921	Figs. 3E-F, Table S2B
Q3978	61	MD then TTX	0.4	137.805	Table S2B
Q3978	68	MD then TTX	0.05	165.414	Table S2B
Q3978	68	MD then TTX	0.2	302.538	Figs. 3E-F, Table S2B
Q3978	68	MD then TTX	0.4	191.944	Table S2B
Q3978	75	MD then TTX	0.05	103.525	Fig. 3G, Table S2B
Q3978	75	MD then TTX	0.2	128.265	Figs. 3E-G, Table S2B
Q3978	75	MD then TTX	0.4	63.2799	Fig. 3G, Table S2B
Q3982	47	MD then TTX	0.05	117.533	Fig. 3G, Table S2B
Q3982	47	MD then TTX	0.2	108.667	Figs. 3E-G, Table S2B
Q3982	47	MD then TTX	0.4	55.7933	Fig. 3G, Table S2B
Q3982	54	MD then TTX	0.05	60.9747	Fig. 3G, Table S2B
Q3982	54	MD then TTX	0.2	46.8741	Figs. 3E-G, Table S2B
Q3982	54	MD then TTX	0.4	51.9383	Fig. 3G, Table S2B
Q3982	61	MD then TTX	0.05	107.812	Table S2B
Q3982	61	MD then TTX	0.2	73.3141	Figs. 3E-F, Table S2B
Q3982	61	MD then TTX	0.4	18.5257	Table S2B
Q3982	68	MD then TTX	0.05	42.0758	Table S2B
Q3982	68	MD then TTX	0.2	68.6051	Figs. 3E-F, Table S2B
Q3982	68	MD then TTX	0.4	33.76	Table S2B
Q3982	75	MD then TTX	0.05	101.335	Fig. 3G, Table S2B
Q3982	75	MD then TTX	0.2	63.3086	Figs. 3E-G, Table S2B
Q3982	75	MD then TTX	0.4	31.5305	Fig. 3G, Table S2B
R4052	47	MD then TTX	0.05	90.0076	Fig. 3G, Table S2B
R4052	47	MD then TTX	0.2	105.544	Figs. 3E-G, Table S2B
R4052	47	MD then TTX	0.4	63.4749	Fig. 3G, Table S2B
R4052	54	MD then TTX	0.05	67.508	Fig. 3G, Table S2B
R4052	54	MD then TTX	0.2	52.6676	Figs. 3E-G, Table S2B
R4052	54	MD then TTX	0.4	7.70397	Fig. 3G, Table S2B
R4052	61	MD then TTX	0.05	37.9867	Table S2B
R4052	61	MD then TTX	0.2	39.2739	Figs. 3E-F, Table S2B
R4052	61	MD then TTX	0.4	30.1368	Table S2B
R4052	68	MD then TTX	0.05	70.3668	Table S2B
R4052	68	MD then TTX	0.2	97.5465	Figs. 3E-F, Table S2B
R4052	68	MD then TTX	0.4	64.5219	Table S2B
R4052	75	MD then TTX	0.05	48.4295	Fig. 3G, Table S2B
R4052	75	MD then TTX	0.2	78.2591	Figs. 3E-G, Table S2B
R4052	75	MD then TTX	0.4	61.7425	Fig. 3G, Table S2B
S4076	47	MD then TTX	0.05	33.7529	Fig. 3G, Table S2B
S4076	47	MD then TTX	0.2	44.3047	Figs. 3E-G, Table S2B
S4076	47	MD then TTX	0.4	33.3539	Fig. 3G, Table S2B
S4076	54	MD then TTX	0.05	27.6805	Fig. 3G, Table S2B
S4076	54	MD then TTX	0.2	29.8098	Figs. 3E-G, Table S2B
S4076	54	MD then TTX	0.4	11.5277	Fig. 3G, Table S2B
S4076	61	MD then TTX	0.05	25.3974	Table S2B
S4076	61	MD then TTX	0.2	36.007	Figs. 3E-F, Table S2B
S4076	61	MD then TTX	0.4	12.9544	Table S2B
S4076	68	MD then TTX	0.05	45.8315	Table S2B
S4076	68	MD then TTX	0.2	44.047	Figs. 3E-F, Table S2B
S4076	68	MD then TTX	0.4	29.9488	Table S2B
S4076	75	MD then TTX	0.05	17.4914	Fig. 3G, Table S2B
S4076	75	MD then TTX	0.2	30.1158	Figs. 3E-G, Table S2B
S4076	75	MD then TTX	0.4	21.979	Fig. 3G, Table S2B
S4079	47	MD then TTX	0.05	89.5392	Fig. 3G, Table S2B
S4079	47	MD then TTX	0.2	109.799	Figs. 3E-G, Table S2B
S4079	47	MD then TTX	0.4	35.9528	Fig. 3G, Table S2B
S4079	54	MD then TTX	0.05	171.324	Fig. 3G, Table S2B
S4079	54	MD then TTX	0.2	62.1316	Figs. 3E-G, Table S2B
S4079	54	MD then TTX	0.4	26.6507	Fig. 3G, Table S2B
S4079	61	MD then TTX	0.05	81.095	Table S2B
S4079	61	MD then TTX	0.2	44.2606	Figs. 3E-F, Table S2B
S4079	61	MD then TTX	0.4	16.9889	Table S2B
S4079	68	MD then TTX	0.05	69.3954	Table S2B
S4079	68	MD then TTX	0.2	7.19878	Figs. 3E-F, Table S2B
S4079	68	MD then TTX	0.4	16.3939	Table S2B
S4079	75	MD then TTX	0.05	58.7055	Fig. 3G, Table S2B
S4079	75	MD then TTX	0.2	13.7515	Figs. 3E-G, Table S2B
S4079	75	MD then TTX	0.4	32.7731	Fig. 3G, Table S2B
W4463	47	MD then TTX	0.05	92.5875	Fig. 3G, Table S2B
W4463	47	MD then TTX	0.2	94.599	Figs. 3E-G, Table S2B
W4463	47	MD then TTX	0.4	59.9255	Fig. 3G, Table S2B
W4463	54	MD then TTX	0.05	28.2358	Fig. 3G, Table S2B
W4463	54	MD then TTX	0.2	24.0982	Figs. 3E-G, Table S2B
W4463	54	MD then TTX	0.4	14.8749	Fig. 3G, Table S2B
W4463	61	MD then TTX	0.05	37.9382	Table S2B
W4463	61	MD then TTX	0.2	11.5121	Figs. 3E-F, Table S2B
W4463	61	MD then TTX	0.4	18.1422	Table S2B
W4463	68	MD then TTX	0.05	33.1724	Table S2B
W4463	68	MD then TTX	0.2	20.2626	Figs. 3E-F, Table S2B
W4463	68	MD then TTX	0.4	6.18294	Table S2B
W4463	75	MD then TTX	0.05	101.514	Fig. 3G, Table S2B
W4463	75	MD then TTX	0.2	109.765	Figs. 3E-G, Table S2B
W4463	75	MD then TTX	0.4	64.8257	Fig. 3G, Table S2B
W4466	47	MD then TTX	0.05	67.9064	Fig. 3G, Table S2B
W4466	47	MD then TTX	0.2	92.3048	Figs. 3E-G, Table S2B
W4466	47	MD then TTX	0.4	43.7185	Fig. 3G, Table S2B
W4466	54	MD then TTX	0.05	39.9143	Fig. 3G, Table S2B
W4466	54	MD then TTX	0.2	32.2602	Figs. 3E-G, Table S2B
W4466	54	MD then TTX	0.4	27.8119	Fig. 3G, Table S2B
W4466	61	MD then TTX	0.05	47.4526	Table S2B
W4466	61	MD then TTX	0.2	5.11019	Figs. 3E-F, Table S2B
W4466	61	MD then TTX	0.4	17.8761	Table S2B
W4466	68	MD then TTX	0.05	42.5202	Table S2B
W4466	68	MD then TTX	0.2	11.9412	Figs. 3E-F, Table S2B
W4466	68	MD then TTX	0.4	28.8546	Table S2B
W4466	75	MD then TTX	0.05	45.3644	Fig. 3G, Table S2B
W4466	75	MD then TTX	0.2	15.77	Figs. 3E-G, Table S2B
W4466	75	MD then TTX	0.4	10.8365	Fig. 3G, Table S2B
W4469	47	MD then TTX	0.05	123.411	Fig. 3G, Table S2B
W4469	47	MD then TTX	0.2	103.462	Figs. 3E-G, Table S2B
W4469	47	MD then TTX	0.4	53.6248	Fig. 3G, Table S2B
W4469	54	MD then TTX	0.05	123.558	Fig. 3G, Table S2B
W4469	54	MD then TTX	0.2	52.7898	Figs. 3E-G, Table S2B
W4469	54	MD then TTX	0.4	22.2791	Fig. 3G, Table S2B
W4469	61	MD then TTX	0.05	130.321	Table S2B
W4469	61	MD then TTX	0.2	33.1506	Figs. 3E-F, Table S2B
W4469	61	MD then TTX	0.4	9.38522	Table S2B
W4469	68	MD then TTX	0.05	141.319	Table S2B
W4469	68	MD then TTX	0.2	116.314	Figs. 3E-F, Table S2B
W4469	68	MD then TTX	0.4	99.2839	Table S2B
W4469	75	MD then TTX	0.05	78.2157	Fig. 3G, Table S2B
W4469	75	MD then TTX	0.2	31.0143	Figs. 3E-G, Table S2B
W4469	75	MD then TTX	0.4	21.1847	Fig. 3G, Table S2B
W4472	47	MD then TTX	0.05	102.531	Fig. 3G, Table S2B
W4472	47	MD then TTX	0.2	124.692	Figs. 3E-G, Table S2B
W4472	47	MD then TTX	0.4	76.1615	Fig. 3G, Table S2B
W4472	54	MD then TTX	0.05	142.271	Fig. 3G, Table S2B
W4472	54	MD then TTX	0.2	73.2692	Figs. 3E-G, Table S2B
W4472	54	MD then TTX	0.4	21.5965	Fig. 3G, Table S2B
W4472	61	MD then TTX	0.05	133.305	Table S2B
W4472	61	MD then TTX	0.2	42.2402	Figs. 3E-F, Table S2B
W4472	61	MD then TTX	0.4	2.15882	Table S2B
W4472	68	MD then TTX	0.05	86.282	Table S2B
W4472	68	MD then TTX	0.2	71.3116	Figs. 3E-F, Table S2B
W4472	68	MD then TTX	0.4	13.3848	Table S2B
W4472	75	MD then TTX	0.05	95.5605	Fig. 3G, Table S2B
W4472	75	MD then TTX	0.2	25.0163	Figs. 3E-G, Table S2B
W4472	75	MD then TTX	0.4	39.2953	Fig. 3G, Table S2B
