# Supplementary material for: Correction of amblyopia in cats and mice after the critical period
Source: eLife. 2021 Aug 31;10:e70023. doi: 10.7554/eLife.70023 (PMC8456712; doi:10.7554/eLife.70023)
Supplement: Figure 4—source data 1. [file elife-70023-fig4-data1.xlsx]

## Sheet: C474
Postnatal Age (days)	Spatial Frequency (cpd)	Condition	Hemisphere	Analysis frequency	Eye	Mean Power (uV)	SD Power (uV)	Associated figure/table
30	0.05	pre-MD	right	2Hz + harmonics	deprived	13.9437	1.52407	Table S3A
51	0.05	post-MD / pre-TTX	right	2Hz + harmonics	deprived	18.2975	1.37249	Fig. 4F; Table S3A
55	0.05	post-MD / pre-TTX	right	2Hz + harmonics	deprived	30.4966	2.16237	Table S3A
65	0.05	post-MD / pre-TTX	right	2Hz + harmonics	deprived	33.4408	5.84406	Table S3A
67	0.05	during TTX	right	2Hz + harmonics	deprived	54.6181	1.21179	Table S3A
69	0.05	during TTX	right	2Hz + harmonics	deprived	68.2315	2.87491	Table S3A
71	0.05	during TTX	right	2Hz + harmonics	deprived	73.2395	2.62569	Table S3A
73	0.05	during TTX	right	2Hz + harmonics	deprived	64.0248	3.49439	Table S3A
75	0.05	during TTX	right	2Hz + harmonics	deprived	107.909	2.15253	Fig. 4F; Table S3A
81	0.05	post-TTX	right	2Hz + harmonics	deprived	49.7284	7.49202	Table S3A
83	0.05	post-TTX	right	2Hz + harmonics	deprived	58.0731	2.71726	Table S3A
87	0.05	post-TTX	right	2Hz + harmonics	deprived	61.3899	2.76382	Fig. 4F; Table S3A
102	0.05	post-TTX	right	2Hz + harmonics	deprived	52.9347	2.19992	Table S3A
30	0.05	pre-MD	right	control frequencies	deprived	4.00853	0.242977	Table S3A
51	0.05	post-MD / pre-TTX	right	control frequencies	deprived	9.63052	0.602853	Fig. 4F; Table S3A
55	0.05	post-MD / pre-TTX	right	control frequencies	deprived	11.7553	0.760476	Table S3A
65	0.05	post-MD / pre-TTX	right	control frequencies	deprived	13.2898	1.79449	Table S3A
67	0.05	during TTX	right	control frequencies	deprived	14.0179	1.07695	Table S3A
69	0.05	during TTX	right	control frequencies	deprived	16.8611	0.809628	Table S3A
71	0.05	during TTX	right	control frequencies	deprived	18.2946	1.12937	Table S3A
73	0.05	during TTX	right	control frequencies	deprived	15.3068	0.86193	Table S3A
75	0.05	during TTX	right	control frequencies	deprived	16.9512	0.895558	Fig. 4F; Table S3A
81	0.05	post-TTX	right	control frequencies	deprived	12.9273	0.775463	Table S3A
83	0.05	post-TTX	right	control frequencies	deprived	15.1982	0.916917	Table S3A
87	0.05	post-TTX	right	control frequencies	deprived	18.8061	1.80329	Fig. 4F; Table S3A
102	0.05	post-TTX	right	control frequencies	deprived	12.4172	1.02258	Table S3A
30	0.05	pre-MD	right	2Hz + harmonics	fellow	12.2719	1.30395	Table S3A
51	0.05	post-MD / pre-TTX	right	2Hz + harmonics	fellow	77.3018	6.22367	Fig. 4F; Table S3A
55	0.05	post-MD / pre-TTX	right	2Hz + harmonics	fellow	90.8178	4.46093	Table S3A
65	0.05	post-MD / pre-TTX	right	2Hz + harmonics	fellow	90.3175	4.14068	Table S3A
67	0.05	during TTX	right	2Hz + harmonics	fellow	17.1449	1.54438	Table S3A
69	0.05	during TTX	right	2Hz + harmonics	fellow	22.0863	2.72575	Table S3A
71	0.05	during TTX	right	2Hz + harmonics	fellow	18.7759	2.9652	Table S3A
73	0.05	during TTX	right	2Hz + harmonics	fellow	20.4369	2.91651	Table S3A
75	0.05	during TTX	right	2Hz + harmonics	fellow	20.0868	2.66419	Fig. 4F; Table S3A
81	0.05	post-TTX	right	2Hz + harmonics	fellow	34.4315	2.61102	Table S3A
83	0.05	post-TTX	right	2Hz + harmonics	fellow	65.6821	4.77865	Table S3A
87	0.05	post-TTX	right	2Hz + harmonics	fellow	65.6755	3.32801	Fig. 4F; Table S3A
102	0.05	post-TTX	right	2Hz + harmonics	fellow	49.8515	1.33937	Table S3A
30	0.05	pre-MD	right	control frequencies	fellow	4.67705	0.305476	Table S3A
51	0.05	post-MD / pre-TTX	right	control frequencies	fellow	12.3276	0.714811	Fig. 4F; Table S3A
55	0.05	post-MD / pre-TTX	right	control frequencies	fellow	12.4617	0.836973	Table S3A
65	0.05	post-MD / pre-TTX	right	control frequencies	fellow	14.5062	0.832951	Table S3A
67	0.05	during TTX	right	control frequencies	fellow	14.4465	0.639887	Table S3A
69	0.05	during TTX	right	control frequencies	fellow	15.1328	1.84828	Table S3A
71	0.05	during TTX	right	control frequencies	fellow	15.6045	2.12794	Table S3A
73	0.05	during TTX	right	control frequencies	fellow	17.3689	2.06064	Table S3A
75	0.05	during TTX	right	control frequencies	fellow	14.6439	0.895558	Fig. 4F; Table S3A
81	0.05	post-TTX	right	control frequencies	fellow	12.3767	1.07151	Table S3A
83	0.05	post-TTX	right	control frequencies	fellow	18.6493	0.627178	Table S3A
87	0.05	post-TTX	right	control frequencies	fellow	15.9879	1.11295	Fig. 4F; Table S3A
102	0.05	post-TTX	right	control frequencies	fellow	12.3121	0.865905	Table S3A
30	0.1	pre-MD	right	2Hz + harmonics	deprived	14.5065	0.941443	Figs. 4E, 4G, S3A; Table S3A
51	0.1	post-MD / pre-TTX	right	2Hz + harmonics	deprived	17.4284	2.26879	Figs. 4E-G, S3A; Table S3A
55	0.1	post-MD / pre-TTX	right	2Hz + harmonics	deprived	20.3663	2.05705	Figs. 4E, 4G, S3A; Table S3A
65	0.1	post-MD / pre-TTX	right	2Hz + harmonics	deprived	20.552	3.61047	Figs. 4E, 4G, S3A; Table S3A
67	0.1	during TTX	right	2Hz + harmonics	deprived	44.5853	3.14501	Figs. 4E, 4G, S3A; Table S3A
69	0.1	during TTX	right	2Hz + harmonics	deprived	47.8464	3.81177	Figs. 4E, 4G, S3A; Table S3A
71	0.1	during TTX	right	2Hz + harmonics	deprived	68.5391	3.92827	Figs. 4E, 4G, S3A; Table S3A
73	0.1	during TTX	right	2Hz + harmonics	deprived	64.571	4.90431	Figs. 4E, 4G, S3A; Table S3A
75	0.1	during TTX	right	2Hz + harmonics	deprived	102.853	4.08346	Figs. 4E-G, S3A; Table S3A
81	0.1	post-TTX	right	2Hz + harmonics	deprived	41.2023	7.81699	Figs. 4E, 4G, S3A; Table S3A
83	0.1	post-TTX	right	2Hz + harmonics	deprived	46.8855	4.05012	Figs. 4E, 4G, S3A; Table S3A
87	0.1	post-TTX	right	2Hz + harmonics	deprived	50.6439	3.23007	Figs. 4E-G, S3A; Table S3A
102	0.1	post-TTX	right	2Hz + harmonics	deprived	44.8214	2.55405	Figs. 4E, 4G, S3A; Table S3A
30	0.1	pre-MD	right	control frequencies	deprived	3.82023	0.278263	Table S3A
51	0.1	post-MD / pre-TTX	right	control frequencies	deprived	11.5629	0.52363	Fig. 4F; Table S3A
55	0.1	post-MD / pre-TTX	right	control frequencies	deprived	11.0885	1.00612	Table S3A
65	0.1	post-MD / pre-TTX	right	control frequencies	deprived	14.0436	1.65562	Table S3A
67	0.1	during TTX	right	control frequencies	deprived	15.078	1.29793	Table S3A
69	0.1	during TTX	right	control frequencies	deprived	17.3674	1.33857	Table S3A
71	0.1	during TTX	right	control frequencies	deprived	19.2486	1.14223	Table S3A
73	0.1	during TTX	right	control frequencies	deprived	18.1142	0.963326	Table S3A
75	0.1	during TTX	right	control frequencies	deprived	14.9883	1.19591	Fig. 4F; Table S3A
81	0.1	post-TTX	right	control frequencies	deprived	11.1242	0.869071	Table S3A
83	0.1	post-TTX	right	control frequencies	deprived	17.1267	1.26256	Table S3A
87	0.1	post-TTX	right	control frequencies	deprived	15.3897	1.04885	Fig. 4F; Table S3A
102	0.1	post-TTX	right	control frequencies	deprived	11.9753	0.723588	Table S3A
30	0.1	pre-MD	right	2Hz + harmonics	fellow	13.07	1.27192	Figs. 4E, 4G, S3A; Table S3A
51	0.1	post-MD / pre-TTX	right	2Hz + harmonics	fellow	63.1831	4.81065	Figs. 4E-G, S3A; Table S3A
55	0.1	post-MD / pre-TTX	right	2Hz + harmonics	fellow	83.3066	4.63259	Figs. 4E, 4G, S3A; Table S3A
65	0.1	post-MD / pre-TTX	right	2Hz + harmonics	fellow	82.4188	5.66945	Figs. 4E, 4G, S3A; Table S3A
67	0.1	during TTX	right	2Hz + harmonics	fellow	17.2674	1.68954	Figs. 4E, 4G, S3A; Table S3A
69	0.1	during TTX	right	2Hz + harmonics	fellow	18.4831	1.92066	Figs. 4E, 4G, S3A; Table S3A
71	0.1	during TTX	right	2Hz + harmonics	fellow	18.304	2.45017	Figs. 4E, 4G, S3A; Table S3A
73	0.1	during TTX	right	2Hz + harmonics	fellow	17.9564	1.17925	Figs. 4E, 4G, S3A; Table S3A
75	0.1	during TTX	right	2Hz + harmonics	fellow	15.2629	2.43226	Figs. 4E-G, S3A; Table S3A
81	0.1	post-TTX	right	2Hz + harmonics	fellow	37.5408	3.82425	Figs. 4E, 4G, S3A; Table S3A
83	0.1	post-TTX	right	2Hz + harmonics	fellow	62.4401	4.97666	Figs. 4E, 4G, S3A; Table S3A
87	0.1	post-TTX	right	2Hz + harmonics	fellow	59.285	7.53351	Figs. 4E-G, S3A; Table S3A
102	0.1	post-TTX	right	2Hz + harmonics	fellow	42.9817	3.11468	Figs. 4E, 4G, S3A; Table S3A
30	0.1	pre-MD	right	control frequencies	fellow	4.20938	0.238588	Table S3A
51	0.1	post-MD / pre-TTX	right	control frequencies	fellow	12.6866	0.448902	Fig. 4F; Table S3A
55	0.1	post-MD / pre-TTX	right	control frequencies	fellow	14.8547	0.734765	Table S3A
65	0.1	post-MD / pre-TTX	right	control frequencies	fellow	14.7992	0.738422	Table S3A
67	0.1	during TTX	right	control frequencies	fellow	15.5927	1.57348	Table S3A
69	0.1	during TTX	right	control frequencies	fellow	15.0142	0.971081	Table S3A
71	0.1	during TTX	right	control frequencies	fellow	15.072	2.25125	Table S3A
73	0.1	during TTX	right	control frequencies	fellow	17.2261	1.82838	Table S3A
75	0.1	during TTX	right	control frequencies	fellow	15.5382	1.19591	Fig. 4F; Table S3A
81	0.1	post-TTX	right	control frequencies	fellow	15.2112	1.38059	Table S3A
83	0.1	post-TTX	right	control frequencies	fellow	15.7588	0.904164	Table S3A
87	0.1	post-TTX	right	control frequencies	fellow	14.0406	1.17317	Fig. 4F; Table S3A
102	0.1	post-TTX	right	control frequencies	fellow	12.1771	1.26736	Table S3A
30	0.5	pre-MD	right	2Hz + harmonics	deprived	4.44795	0.497183	Table S3A
51	0.5	post-MD / pre-TTX	right	2Hz + harmonics	deprived	10.5901	0.722219	Fig. 4F; Table S3A
55	0.5	post-MD / pre-TTX	right	2Hz + harmonics	deprived	12.7363	1.05864	Table S3A
65	0.5	post-MD / pre-TTX	right	2Hz + harmonics	deprived	14.9258	1.26687	Table S3A
67	0.5	during TTX	right	2Hz + harmonics	deprived	25.4575	1.32204	Table S3A
69	0.5	during TTX	right	2Hz + harmonics	deprived	18.6724	1.50991	Table S3A
71	0.5	during TTX	right	2Hz + harmonics	deprived	27.5876	1.70827	Table S3A
73	0.5	during TTX	right	2Hz + harmonics	deprived	25.2008	2.01579	Table S3A
75	0.5	during TTX	right	2Hz + harmonics	deprived	41.0923	3.75194	Fig. 4F; Table S3A
81	0.5	post-TTX	right	2Hz + harmonics	deprived	19.6844	2.68846	Table S3A
83	0.5	post-TTX	right	2Hz + harmonics	deprived	19.3956	1.59742	Table S3A
87	0.5	post-TTX	right	2Hz + harmonics	deprived	26.5902	3.09684	Fig. 4F; Table S3A
102	0.5	post-TTX	right	2Hz + harmonics	deprived	28.8544	1.70586	Table S3A
30	0.5	pre-MD	right	control frequencies	deprived	4.32403	0.198597	Table S3A
51	0.5	post-MD / pre-TTX	right	control frequencies	deprived	12.0933	0.7199	Fig. 4F; Table S3A
55	0.5	post-MD / pre-TTX	right	control frequencies	deprived	11.368	0.892439	Table S3A
65	0.5	post-MD / pre-TTX	right	control frequencies	deprived	15.5701	1.05644	Table S3A
67	0.5	during TTX	right	control frequencies	deprived	14.2133	0.875231	Table S3A
69	0.5	during TTX	right	control frequencies	deprived	15.3666	1.12535	Table S3A
71	0.5	during TTX	right	control frequencies	deprived	17.5971	1.58749	Table S3A
73	0.5	during TTX	right	control frequencies	deprived	18.2621	1.02689	Table S3A
75	0.5	during TTX	right	control frequencies	deprived	15.2376	1.14731	Fig. 4F; Table S3A
81	0.5	post-TTX	right	control frequencies	deprived	14.9274	1.23112	Table S3A
83	0.5	post-TTX	right	control frequencies	deprived	15.8444	0.893319	Table S3A
87	0.5	post-TTX	right	control frequencies	deprived	15.5109	1.0289	Fig. 4F; Table S3A
102	0.5	post-TTX	right	control frequencies	deprived	14.3578	0.996859	Table S3A
30	0.5	pre-MD	right	2Hz + harmonics	fellow	5.68816	0.354487	Table S3A
51	0.5	post-MD / pre-TTX	right	2Hz + harmonics	fellow	32.8687	3.66091	Fig. 4F; Table S3A
55	0.5	post-MD / pre-TTX	right	2Hz + harmonics	fellow	25.9286	4.10373	Table S3A
65	0.5	post-MD / pre-TTX	right	2Hz + harmonics	fellow	33.216	3.51462	Table S3A
67	0.5	during TTX	right	2Hz + harmonics	fellow	15.4225	0.600434	Table S3A
69	0.5	during TTX	right	2Hz + harmonics	fellow	17.4138	1.0232	Table S3A
71	0.5	during TTX	right	2Hz + harmonics	fellow	15.316	1.98463	Table S3A
73	0.5	during TTX	right	2Hz + harmonics	fellow	17.5368	1.40938	Table S3A
75	0.5	during TTX	right	2Hz + harmonics	fellow	13.7135	1.89536	Fig. 4F; Table S3A
81	0.5	post-TTX	right	2Hz + harmonics	fellow	18.1544	2.88613	Table S3A
83	0.5	post-TTX	right	2Hz + harmonics	fellow	29.9247	2.79172	Table S3A
87	0.5	post-TTX	right	2Hz + harmonics	fellow	32.4505	3.54493	Fig. 4F; Table S3A
102	0.5	post-TTX	right	2Hz + harmonics	fellow	26.651	1.34902	Table S3A
30	0.5	pre-MD	right	control frequencies	fellow	3.90429	0.310871	Table S3A
51	0.5	post-MD / pre-TTX	right	control frequencies	fellow	12.9617	0.566325	Fig. 4F; Table S3A
55	0.5	post-MD / pre-TTX	right	control frequencies	fellow	12.3935	0.641447	Table S3A
65	0.5	post-MD / pre-TTX	right	control frequencies	fellow	13.0021	0.685307	Table S3A
67	0.5	during TTX	right	control frequencies	fellow	16.617	1.51775	Table S3A
69	0.5	during TTX	right	control frequencies	fellow	17.2068	1.5759	Table S3A
71	0.5	during TTX	right	control frequencies	fellow	15.055	1.93988	Table S3A
73	0.5	during TTX	right	control frequencies	fellow	15.5402	0.874003	Table S3A
75	0.5	during TTX	right	control frequencies	fellow	13.4604	1.14731	Fig. 4F; Table S3A
81	0.5	post-TTX	right	control frequencies	fellow	13.997	1.25216	Table S3A
83	0.5	post-TTX	right	control frequencies	fellow	18.2709	1.30046	Table S3A
87	0.5	post-TTX	right	control frequencies	fellow	14.4642	0.96584	Fig. 4F; Table S3A
102	0.5	post-TTX	right	control frequencies	fellow	13.5776	0.77547	Table S3A
51	1	post-MD / pre-TTX	right	2Hz + harmonics	deprived	12.9087	1.01615	Fig. 4F
75	1	during TTX	right	2Hz + harmonics	deprived	22.3328	1.30548	Fig. 4F
87	1	post-TTX	right	2Hz + harmonics	deprived	19.3444	1.94172	Fig. 4F
51	1	post-MD / pre-TTX	right	control frequencies	deprived	12.1568	0.771596	Fig. 4F
75	1	during TTX	right	control frequencies	deprived	14.8497	0.766691	Fig. 4F
87	1	post-TTX	right	control frequencies	deprived	14.76	0.952561	Fig. 4F
51	1	post-MD / pre-TTX	right	2Hz + harmonics	fellow	12.889	0.457903	Fig. 4F
75	1	during TTX	right	2Hz + harmonics	fellow	15.7695	0.986848	Fig. 4F
87	1	post-TTX	right	2Hz + harmonics	fellow	21.2037	2.65094	Fig. 4F
51	1	post-MD / pre-TTX	right	control frequencies	fellow	12.0933	0.806056	Fig. 4F
75	1	during TTX	right	control frequencies	fellow	14.1829	0.766691	Fig. 4F
87	1	post-TTX	right	control frequencies	fellow	15.499	1.30744	Fig. 4F
51	2	post-MD / pre-TTX	right	2Hz + harmonics	deprived	10.583	0.690734	Fig. 4F
75	2	during TTX	right	2Hz + harmonics	deprived	15.5025	0.941028	Fig. 4F
87	2	post-TTX	right	2Hz + harmonics	deprived	15.4493	0.687457	Fig. 4F
51	2	post-MD / pre-TTX	right	control frequencies	deprived	12.5529	0.977779	Fig. 4F
75	2	during TTX	right	control frequencies	deprived	14.5865	0.946167	Fig. 4F
87	2	post-TTX	right	control frequencies	deprived	16.8724	1.38102	Fig. 4F
51	2	post-MD / pre-TTX	right	2Hz + harmonics	fellow	15.533	0.812574	Fig. 4F
75	2	during TTX	right	2Hz + harmonics	fellow	11.9063	1.02226	Fig. 4F
87	2	post-TTX	right	2Hz + harmonics	fellow	13.6685	0.681317	Fig. 4F
51	2	post-MD / pre-TTX	right	control frequencies	fellow	12.0309	0.707622	Fig. 4F
75	2	during TTX	right	control frequencies	fellow	14.5286	0.946167	Fig. 4F
87	2	post-TTX	right	control frequencies	fellow	17.1785	1.12286	Fig. 4F
30	grey	pre-MD	right	2Hz + harmonics	deprived	3.89135	0.282597	Table S3A
51	grey	post-MD / pre-TTX	right	2Hz + harmonics	deprived	11.618	0.745595	Fig. 4F; Table S3A
55	grey	post-MD / pre-TTX	right	2Hz + harmonics	deprived	13.5153	0.757913	Table S3A
65	grey	post-MD / pre-TTX	right	2Hz + harmonics	deprived	14.0395	0.965776	Table S3A
67	grey	during TTX	right	2Hz + harmonics	deprived	15.5702	0.898051	Table S3A
69	grey	during TTX	right	2Hz + harmonics	deprived	17.0883	0.953737	Table S3A
71	grey	during TTX	right	2Hz + harmonics	deprived	16.6982	1.37264	Table S3A
73	grey	during TTX	right	2Hz + harmonics	deprived	15.6952	1.3516	Table S3A
75	grey	during TTX	right	2Hz + harmonics	deprived	16.0701	1.46295	Fig. 4F; Table S3A
81	grey	post-TTX	right	2Hz + harmonics	deprived	14.7089	1.29122	Table S3A
83	grey	post-TTX	right	2Hz + harmonics	deprived	17.5855	1.33256	Table S3A
87	grey	post-TTX	right	2Hz + harmonics	deprived	15.3926	1.12864	Fig. 4F; Table S3A
102	grey	post-TTX	right	2Hz + harmonics	deprived	13.4631	0.762915	Table S3A
30	grey	pre-MD	right	control frequencies	deprived	3.5052	0.286426	Table S3A
51	grey	post-MD / pre-TTX	right	control frequencies	deprived	11.8142	0.576887	Fig. 4F; Table S3A
55	grey	post-MD / pre-TTX	right	control frequencies	deprived	12.6667	1.13341	Table S3A
65	grey	post-MD / pre-TTX	right	control frequencies	deprived	13.5155	1.59476	Table S3A
67	grey	during TTX	right	control frequencies	deprived	14.2691	0.544874	Table S3A
69	grey	during TTX	right	control frequencies	deprived	16.6365	0.796628	Table S3A
71	grey	during TTX	right	control frequencies	deprived	14.5716	1.0561	Table S3A
73	grey	during TTX	right	control frequencies	deprived	16.8378	1.09256	Table S3A
75	grey	during TTX	right	control frequencies	deprived	15.7531	1.54996	Fig. 4F; Table S3A
81	grey	post-TTX	right	control frequencies	deprived	13.2274	0.764444	Table S3A
83	grey	post-TTX	right	control frequencies	deprived	15.3355	1.04668	Table S3A
87	grey	post-TTX	right	control frequencies	deprived	18.747	1.78016	Fig. 4F; Table S3A
102	grey	post-TTX	right	control frequencies	deprived	14.1496	0.664036	Table S3A
30	grey	pre-MD	right	2Hz + harmonics	fellow	3.51419	0.331047	Table S3A
51	grey	post-MD / pre-TTX	right	2Hz + harmonics	fellow	13.9912	0.854185	Fig. 4F; Table S3A
55	grey	post-MD / pre-TTX	right	2Hz + harmonics	fellow	14.2664	0.810258	Table S3A
65	grey	post-MD / pre-TTX	right	2Hz + harmonics	fellow	13.7804	0.640729	Table S3A
67	grey	during TTX	right	2Hz + harmonics	fellow	14.3592	1.24277	Table S3A
69	grey	during TTX	right	2Hz + harmonics	fellow	15.669	1.85356	Table S3A
71	grey	during TTX	right	2Hz + harmonics	fellow	17.7394	2.43396	Table S3A
73	grey	during TTX	right	2Hz + harmonics	fellow	16.7765	1.53454	Table S3A
75	grey	during TTX	right	2Hz + harmonics	fellow	15.5888	1.58761	Fig. 4F; Table S3A
81	grey	post-TTX	right	2Hz + harmonics	fellow	13.0778	1.12145	Table S3A
83	grey	post-TTX	right	2Hz + harmonics	fellow	19.0769	1.29012	Table S3A
87	grey	post-TTX	right	2Hz + harmonics	fellow	16.6187	2.1185	Fig. 4F; Table S3A
102	grey	post-TTX	right	2Hz + harmonics	fellow	16.5431	0.89763	Table S3A
30	grey	pre-MD	right	control frequencies	fellow	4.56351	0.296328	Table S3A
51	grey	post-MD / pre-TTX	right	control frequencies	fellow	12.4659	0.607106	Fig. 4F; Table S3A
55	grey	post-MD / pre-TTX	right	control frequencies	fellow	13.0003	0.838173	Table S3A
65	grey	post-MD / pre-TTX	right	control frequencies	fellow	15.3601	0.875269	Table S3A
67	grey	during TTX	right	control frequencies	fellow	12.8689	1.01455	Table S3A
69	grey	during TTX	right	control frequencies	fellow	12.2829	1.18431	Table S3A
71	grey	during TTX	right	control frequencies	fellow	15.3978	2.11586	Table S3A
73	grey	during TTX	right	control frequencies	fellow	16.0207	0.885668	Table S3A
75	grey	during TTX	right	control frequencies	fellow	13.3469	1.54996	Fig. 4F; Table S3A
81	grey	post-TTX	right	control frequencies	fellow	13.4184	0.950601	Table S3A
83	grey	post-TTX	right	control frequencies	fellow	18.5035	1.30263	Table S3A
87	grey	post-TTX	right	control frequencies	fellow	16.4849	1.35935	Fig. 4F; Table S3A
102	grey	post-TTX	right	control frequencies	fellow	13.9189	0.97617	Table S3A
30	0.05	pre-MD	left	2Hz + harmonics	deprived	14.6	1.43547	Table S3A
51	0.05	post-MD / pre-TTX	left	2Hz + harmonics	deprived	18.2623	1.16872	Table S3A
55	0.05	post-MD / pre-TTX	left	2Hz + harmonics	deprived	31.9979	2.28716	Table S3A
65	0.05	post-MD / pre-TTX	left	2Hz + harmonics	deprived	32.3342	5.55989	Table S3A
67	0.05	during TTX	left	2Hz + harmonics	deprived	61.5891	1.58408	Table S3A
69	0.05	during TTX	left	2Hz + harmonics	deprived	74.0179	3.25809	Table S3A
71	0.05	during TTX	left	2Hz + harmonics	deprived	65.3307	2.27323	Table S3A
73	0.05	during TTX	left	2Hz + harmonics	deprived	63.2678	3.15648	Table S3A
75	0.05	during TTX	left	2Hz + harmonics	deprived	80.1107	0.999792	Table S3A
81	0.05	post-TTX	left	2Hz + harmonics	deprived	47.6398	6.46024	Table S3A
83	0.05	post-TTX	left	2Hz + harmonics	deprived	61.2826	3.06613	Table S3A
87	0.05	post-TTX	left	2Hz + harmonics	deprived	63.0137	2.34703	Table S3A
102	0.05	post-TTX	left	2Hz + harmonics	deprived	57.4598	2.088	Table S3A
30	0.05	pre-MD	left	control frequencies	deprived	3.92693	0.265774	Table S3A
51	0.05	post-MD / pre-TTX	left	control frequencies	deprived	9.76142	0.564539	Table S3A
55	0.05	post-MD / pre-TTX	left	control frequencies	deprived	11.7284	0.806621	Table S3A
65	0.05	post-MD / pre-TTX	left	control frequencies	deprived	14.0674	2.19021	Table S3A
67	0.05	during TTX	left	control frequencies	deprived	15.3455	1.17372	Table S3A
69	0.05	during TTX	left	control frequencies	deprived	17.4928	0.609758	Table S3A
71	0.05	during TTX	left	control frequencies	deprived	17.2122	1.03184	Table S3A
73	0.05	during TTX	left	control frequencies	deprived	14.7513	0.970273	Table S3A
75	0.05	during TTX	left	control frequencies	deprived	15.7782	0.695735	Table S3A
81	0.05	post-TTX	left	control frequencies	deprived	12.9389	1.04229	Table S3A
83	0.05	post-TTX	left	control frequencies	deprived	15.6382	0.816842	Table S3A
87	0.05	post-TTX	left	control frequencies	deprived	18.9533	1.66466	Table S3A
102	0.05	post-TTX	left	control frequencies	deprived	12.9754	0.95488	Table S3A
30	0.05	pre-MD	left	2Hz + harmonics	fellow	11.8102	1.17971	Table S3A
51	0.05	post-MD / pre-TTX	left	2Hz + harmonics	fellow	82.7258	7.49673	Table S3A
55	0.05	post-MD / pre-TTX	left	2Hz + harmonics	fellow	98.6231	4.78149	Table S3A
65	0.05	post-MD / pre-TTX	left	2Hz + harmonics	fellow	99.8165	3.81546	Table S3A
67	0.05	during TTX	left	2Hz + harmonics	fellow	18.3494	1.94627	Table S3A
69	0.05	during TTX	left	2Hz + harmonics	fellow	22.7465	2.89078	Table S3A
71	0.05	during TTX	left	2Hz + harmonics	fellow	17.5368	2.76946	Table S3A
73	0.05	during TTX	left	2Hz + harmonics	fellow	20.3106	3.21708	Table S3A
75	0.05	during TTX	left	2Hz + harmonics	fellow	17.7842	2.00087	Table S3A
81	0.05	post-TTX	left	2Hz + harmonics	fellow	32.7058	2.36582	Table S3A
83	0.05	post-TTX	left	2Hz + harmonics	fellow	69.2776	5.13456	Table S3A
87	0.05	post-TTX	left	2Hz + harmonics	fellow	71.267	5.3758	Table S3A
102	0.05	post-TTX	left	2Hz + harmonics	fellow	54.1714	1.41479	Table S3A
30	0.05	pre-MD	left	control frequencies	fellow	4.57092	0.28761	Table S3A
51	0.05	post-MD / pre-TTX	left	control frequencies	fellow	12.6745	0.708128	Table S3A
55	0.05	post-MD / pre-TTX	left	control frequencies	fellow	12.5982	0.85706	Table S3A
65	0.05	post-MD / pre-TTX	left	control frequencies	fellow	15.0559	0.785762	Table S3A
67	0.05	during TTX	left	control frequencies	fellow	16.0052	0.953027	Table S3A
69	0.05	during TTX	left	control frequencies	fellow	15.7101	2.07833	Table S3A
71	0.05	during TTX	left	control frequencies	fellow	15.0407	1.93035	Table S3A
73	0.05	during TTX	left	control frequencies	fellow	17.3228	1.77703	Table S3A
75	0.05	during TTX	left	control frequencies	fellow	13.6907	1.18189	Table S3A
81	0.05	post-TTX	left	control frequencies	fellow	12.4181	1.21104	Table S3A
83	0.05	post-TTX	left	control frequencies	fellow	18.9886	0.634404	Table S3A
87	0.05	post-TTX	left	control frequencies	fellow	16.4871	1.07946	Table S3A
102	0.05	post-TTX	left	control frequencies	fellow	12.599	0.889357	Table S3A
30	0.1	pre-MD	left	2Hz + harmonics	deprived	14.4931	0.904269	Figs. 4G, S3A; Table S3A
51	0.1	post-MD / pre-TTX	left	2Hz + harmonics	deprived	18.1654	2.50271	Figs. 4G, S3A; Table S3A
55	0.1	post-MD / pre-TTX	left	2Hz + harmonics	deprived	21.4256	2.10446	Figs. 4G, S3A; Table S3A
65	0.1	post-MD / pre-TTX	left	2Hz + harmonics	deprived	20.7791	3.68691	Figs. 4G, S3A; Table S3A
67	0.1	during TTX	left	2Hz + harmonics	deprived	52.8599	3.56335	Figs. 4G, S3A; Table S3A
69	0.1	during TTX	left	2Hz + harmonics	deprived	53.9168	4.20261	Figs. 4G, S3A; Table S3A
71	0.1	during TTX	left	2Hz + harmonics	deprived	60.6317	3.40711	Figs. 4G, S3A; Table S3A
73	0.1	during TTX	left	2Hz + harmonics	deprived	62.8852	4.73395	Figs. 4G, S3A; Table S3A
75	0.1	during TTX	left	2Hz + harmonics	deprived	77.3178	3.42101	Figs. 4G, S3A; Table S3A
81	0.1	post-TTX	left	2Hz + harmonics	deprived	39.4777	7.49069	Figs. 4G, S3A; Table S3A
83	0.1	post-TTX	left	2Hz + harmonics	deprived	49.1098	4.29695	Figs. 4G, S3A; Table S3A
87	0.1	post-TTX	left	2Hz + harmonics	deprived	51.2107	4.05063	Figs. 4G, S3A; Table S3A
102	0.1	post-TTX	left	2Hz + harmonics	deprived	48.1763	2.94374	Figs. 4G, S3A; Table S3A
30	0.1	pre-MD	left	control frequencies	deprived	3.88046	0.244362	Table S3A
51	0.1	post-MD / pre-TTX	left	control frequencies	deprived	12.356	0.547134	Table S3A
55	0.1	post-MD / pre-TTX	left	control frequencies	deprived	11.4905	1.14769	Table S3A
65	0.1	post-MD / pre-TTX	left	control frequencies	deprived	13.7467	1.8537	Table S3A
67	0.1	during TTX	left	control frequencies	deprived	15.7636	1.04909	Table S3A
69	0.1	during TTX	left	control frequencies	deprived	17.1569	1.28948	Table S3A
71	0.1	during TTX	left	control frequencies	deprived	17.4538	1.22517	Table S3A
73	0.1	during TTX	left	control frequencies	deprived	17.2539	1.01724	Table S3A
75	0.1	during TTX	left	control frequencies	deprived	13.2951	1.1422	Table S3A
81	0.1	post-TTX	left	control frequencies	deprived	11.2619	0.786195	Table S3A
83	0.1	post-TTX	left	control frequencies	deprived	17.2579	1.34853	Table S3A
87	0.1	post-TTX	left	control frequencies	deprived	17.6524	0.836621	Table S3A
102	0.1	post-TTX	left	control frequencies	deprived	12.8116	0.797651	Table S3A
30	0.1	pre-MD	left	2Hz + harmonics	fellow	12.4847	1.0407	Figs. 4G, S3A; Table S3A
51	0.1	post-MD / pre-TTX	left	2Hz + harmonics	fellow	66.4288	5.67465	Figs. 4G, S3A; Table S3A
55	0.1	post-MD / pre-TTX	left	2Hz + harmonics	fellow	90.1659	5.07275	Figs. 4G, S3A; Table S3A
65	0.1	post-MD / pre-TTX	left	2Hz + harmonics	fellow	89.2316	5.96452	Figs. 4G, S3A; Table S3A
67	0.1	during TTX	left	2Hz + harmonics	fellow	17.7594	1.93937	Figs. 4G, S3A; Table S3A
69	0.1	during TTX	left	2Hz + harmonics	fellow	20.1706	1.97855	Figs. 4G, S3A; Table S3A
71	0.1	during TTX	left	2Hz + harmonics	fellow	17.8379	2.51864	Figs. 4G, S3A; Table S3A
73	0.1	during TTX	left	2Hz + harmonics	fellow	17.8526	1.40055	Figs. 4G, S3A; Table S3A
75	0.1	during TTX	left	2Hz + harmonics	fellow	13.1078	1.74797	Figs. 4G, S3A; Table S3A
81	0.1	post-TTX	left	2Hz + harmonics	fellow	35.9297	3.54835	Figs. 4G, S3A; Table S3A
83	0.1	post-TTX	left	2Hz + harmonics	fellow	66.5681	5.31599	Figs. 4G, S3A; Table S3A
87	0.1	post-TTX	left	2Hz + harmonics	fellow	61.0602	7.8328	Figs. 4G, S3A; Table S3A
102	0.1	post-TTX	left	2Hz + harmonics	fellow	46.1226	3.33484	Figs. 4G, S3A; Table S3A
30	0.1	pre-MD	left	control frequencies	fellow	4.02802	0.240811	Table S3A
51	0.1	post-MD / pre-TTX	left	control frequencies	fellow	13.2858	0.41962	Table S3A
55	0.1	post-MD / pre-TTX	left	control frequencies	fellow	14.9666	0.655365	Table S3A
65	0.1	post-MD / pre-TTX	left	control frequencies	fellow	14.8471	0.732179	Table S3A
67	0.1	during TTX	left	control frequencies	fellow	16.4184	1.3837	Table S3A
69	0.1	during TTX	left	control frequencies	fellow	16.0655	0.969519	Table S3A
71	0.1	during TTX	left	control frequencies	fellow	13.623	1.93965	Table S3A
73	0.1	during TTX	left	control frequencies	fellow	16.7782	1.56227	Table S3A
75	0.1	during TTX	left	control frequencies	fellow	15.2665	1.3849	Table S3A
81	0.1	post-TTX	left	control frequencies	fellow	14.8824	1.19322	Table S3A
83	0.1	post-TTX	left	control frequencies	fellow	15.9339	0.936692	Table S3A
87	0.1	post-TTX	left	control frequencies	fellow	14.3286	0.982593	Table S3A
102	0.1	post-TTX	left	control frequencies	fellow	12.3361	1.40967	Table S3A
30	0.5	pre-MD	left	2Hz + harmonics	deprived	4.07582	0.455867	Table S3A
51	0.5	post-MD / pre-TTX	left	2Hz + harmonics	deprived	10.9558	0.618366	Table S3A
55	0.5	post-MD / pre-TTX	left	2Hz + harmonics	deprived	12.9134	0.96528	Table S3A
65	0.5	post-MD / pre-TTX	left	2Hz + harmonics	deprived	15.1953	1.38824	Table S3A
67	0.5	during TTX	left	2Hz + harmonics	deprived	29.3069	1.41661	Table S3A
69	0.5	during TTX	left	2Hz + harmonics	deprived	19.2828	1.5599	Table S3A
71	0.5	during TTX	left	2Hz + harmonics	deprived	24.2474	1.65795	Table S3A
73	0.5	during TTX	left	2Hz + harmonics	deprived	24.3446	1.75364	Table S3A
75	0.5	during TTX	left	2Hz + harmonics	deprived	31.7988	2.73662	Table S3A
81	0.5	post-TTX	left	2Hz + harmonics	deprived	19.8005	2.68839	Table S3A
83	0.5	post-TTX	left	2Hz + harmonics	deprived	20.3564	1.62204	Table S3A
87	0.5	post-TTX	left	2Hz + harmonics	deprived	27.7964	2.79271	Table S3A
102	0.5	post-TTX	left	2Hz + harmonics	deprived	30.9144	1.87092	Table S3A
30	0.5	pre-MD	left	control frequencies	deprived	4.00503	0.147917	Table S3A
51	0.5	post-MD / pre-TTX	left	control frequencies	deprived	12.2791	0.61506	Table S3A
55	0.5	post-MD / pre-TTX	left	control frequencies	deprived	11.3845	0.873735	Table S3A
65	0.5	post-MD / pre-TTX	left	control frequencies	deprived	15.3803	0.98054	Table S3A
67	0.5	during TTX	left	control frequencies	deprived	15.1205	0.997988	Table S3A
69	0.5	during TTX	left	control frequencies	deprived	16.3451	1.11847	Table S3A
71	0.5	during TTX	left	control frequencies	deprived	16.5711	1.44117	Table S3A
73	0.5	during TTX	left	control frequencies	deprived	18.2601	1.00284	Table S3A
75	0.5	during TTX	left	control frequencies	deprived	14.0791	0.931691	Table S3A
81	0.5	post-TTX	left	control frequencies	deprived	14.8035	1.30711	Table S3A
83	0.5	post-TTX	left	control frequencies	deprived	16.1983	0.892252	Table S3A
87	0.5	post-TTX	left	control frequencies	deprived	15.6655	0.791769	Table S3A
102	0.5	post-TTX	left	control frequencies	deprived	14.6777	0.983395	Table S3A
30	0.5	pre-MD	left	2Hz + harmonics	fellow	5.52795	0.332499	Table S3A
51	0.5	post-MD / pre-TTX	left	2Hz + harmonics	fellow	31.5533	3.56281	Table S3A
55	0.5	post-MD / pre-TTX	left	2Hz + harmonics	fellow	27.8496	4.43922	Table S3A
65	0.5	post-MD / pre-TTX	left	2Hz + harmonics	fellow	33.9144	3.4243	Table S3A
67	0.5	during TTX	left	2Hz + harmonics	fellow	16.365	0.516841	Table S3A
69	0.5	during TTX	left	2Hz + harmonics	fellow	18.4498	0.998734	Table S3A
71	0.5	during TTX	left	2Hz + harmonics	fellow	14.2762	1.80081	Table S3A
73	0.5	during TTX	left	2Hz + harmonics	fellow	16.4201	1.19318	Table S3A
75	0.5	during TTX	left	2Hz + harmonics	fellow	11.2694	1.46873	Table S3A
81	0.5	post-TTX	left	2Hz + harmonics	fellow	18.0843	2.47622	Table S3A
83	0.5	post-TTX	left	2Hz + harmonics	fellow	30.9093	2.97367	Table S3A
87	0.5	post-TTX	left	2Hz + harmonics	fellow	33.7174	3.58445	Table S3A
102	0.5	post-TTX	left	2Hz + harmonics	fellow	28.4208	1.46254	Table S3A
30	0.5	pre-MD	left	control frequencies	fellow	3.80282	0.331467	Table S3A
51	0.5	post-MD / pre-TTX	left	control frequencies	fellow	12.8635	0.620795	Table S3A
55	0.5	post-MD / pre-TTX	left	control frequencies	fellow	12.4272	0.722723	Table S3A
65	0.5	post-MD / pre-TTX	left	control frequencies	fellow	13.6114	0.720726	Table S3A
67	0.5	during TTX	left	control frequencies	fellow	17.9139	2.1031	Table S3A
69	0.5	during TTX	left	control frequencies	fellow	17.6831	1.81694	Table S3A
71	0.5	during TTX	left	control frequencies	fellow	14.7566	1.93471	Table S3A
73	0.5	during TTX	left	control frequencies	fellow	15.2267	1.01353	Table S3A
75	0.5	during TTX	left	control frequencies	fellow	12.66	1.48617	Table S3A
81	0.5	post-TTX	left	control frequencies	fellow	13.4354	1.45254	Table S3A
83	0.5	post-TTX	left	control frequencies	fellow	18.6361	1.37895	Table S3A
87	0.5	post-TTX	left	control frequencies	fellow	15.0034	1.08072	Table S3A
102	0.5	post-TTX	left	control frequencies	fellow	14.3543	0.765815	Table S3A
30	grey	pre-MD	left	2Hz + harmonics	deprived	3.84926	0.230686	Table S3A
51	grey	post-MD / pre-TTX	left	2Hz + harmonics	deprived	12.2376	0.88447	Table S3A
55	grey	post-MD / pre-TTX	left	2Hz + harmonics	deprived	13.7766	0.685527	Table S3A
65	grey	post-MD / pre-TTX	left	2Hz + harmonics	deprived	13.9331	1.23444	Table S3A
67	grey	during TTX	left	2Hz + harmonics	deprived	16.9765	0.733198	Table S3A
69	grey	during TTX	left	2Hz + harmonics	deprived	18.4122	1.04137	Table S3A
71	grey	during TTX	left	2Hz + harmonics	deprived	16.1424	1.22995	Table S3A
73	grey	during TTX	left	2Hz + harmonics	deprived	15.005	1.51646	Table S3A
75	grey	during TTX	left	2Hz + harmonics	deprived	15.3211	1.23479	Table S3A
81	grey	post-TTX	left	2Hz + harmonics	deprived	13.3476	1.09432	Table S3A
83	grey	post-TTX	left	2Hz + harmonics	deprived	17.4947	1.38817	Table S3A
87	grey	post-TTX	left	2Hz + harmonics	deprived	15.3811	1.06439	Table S3A
102	grey	post-TTX	left	2Hz + harmonics	deprived	13.9886	0.910863	Table S3A
30	grey	pre-MD	left	control frequencies	deprived	3.51824	0.31699	Table S3A
51	grey	post-MD / pre-TTX	left	control frequencies	deprived	12.5033	0.57164	Table S3A
55	grey	post-MD / pre-TTX	left	control frequencies	deprived	12.7199	1.18859	Table S3A
65	grey	post-MD / pre-TTX	left	control frequencies	deprived	14.287	1.63134	Table S3A
67	grey	during TTX	left	control frequencies	deprived	15.5742	0.554996	Table S3A
69	grey	during TTX	left	control frequencies	deprived	17.75	0.895472	Table S3A
71	grey	during TTX	left	control frequencies	deprived	14.0698	1.1631	Table S3A
73	grey	during TTX	left	control frequencies	deprived	16.4136	0.763453	Table S3A
75	grey	during TTX	left	control frequencies	deprived	13.6827	1.21863	Table S3A
81	grey	post-TTX	left	control frequencies	deprived	13.3971	1.36199	Table S3A
83	grey	post-TTX	left	control frequencies	deprived	15.5546	1.03406	Table S3A
87	grey	post-TTX	left	control frequencies	deprived	18.4684	1.91837	Table S3A
102	grey	post-TTX	left	control frequencies	deprived	14.1054	0.76764	Table S3A
30	grey	pre-MD	left	2Hz + harmonics	fellow	3.55766	0.3043	Table S3A
51	grey	post-MD / pre-TTX	left	2Hz + harmonics	fellow	14.1643	1.05085	Table S3A
55	grey	post-MD / pre-TTX	left	2Hz + harmonics	fellow	14.5566	0.889666	Table S3A
65	grey	post-MD / pre-TTX	left	2Hz + harmonics	fellow	14.3892	0.750189	Table S3A
67	grey	during TTX	left	2Hz + harmonics	fellow	15.2608	1.26305	Table S3A
69	grey	during TTX	left	2Hz + harmonics	fellow	15.9783	1.92792	Table S3A
71	grey	during TTX	left	2Hz + harmonics	fellow	17.6748	2.35338	Table S3A
73	grey	during TTX	left	2Hz + harmonics	fellow	15.8976	1.45792	Table S3A
75	grey	during TTX	left	2Hz + harmonics	fellow	13.3291	1.08141	Table S3A
81	grey	post-TTX	left	2Hz + harmonics	fellow	13.2903	1.15338	Table S3A
83	grey	post-TTX	left	2Hz + harmonics	fellow	19.3858	1.41623	Table S3A
87	grey	post-TTX	left	2Hz + harmonics	fellow	18.4388	1.47294	Table S3A
102	grey	post-TTX	left	2Hz + harmonics	fellow	17.1665	1.14165	Table S3A
30	grey	pre-MD	left	control frequencies	fellow	4.50533	0.297207	Table S3A
51	grey	post-MD / pre-TTX	left	control frequencies	fellow	12.0911	0.67497	Table S3A
55	grey	post-MD / pre-TTX	left	control frequencies	fellow	12.9732	0.743167	Table S3A
65	grey	post-MD / pre-TTX	left	control frequencies	fellow	15.474	1.05404	Table S3A
67	grey	during TTX	left	control frequencies	fellow	14.6245	0.980153	Table S3A
69	grey	during TTX	left	control frequencies	fellow	13.7531	1.36785	Table S3A
71	grey	during TTX	left	control frequencies	fellow	14.4931	1.83626	Table S3A
73	grey	during TTX	left	control frequencies	fellow	16.582	1.07061	Table S3A
75	grey	during TTX	left	control frequencies	fellow	12.6391	1.12466	Table S3A
81	grey	post-TTX	left	control frequencies	fellow	13.2678	1.16577	Table S3A
83	grey	post-TTX	left	control frequencies	fellow	18.5063	1.42568	Table S3A
87	grey	post-TTX	left	control frequencies	fellow	16.6413	1.67381	Table S3A
102	grey	post-TTX	left	control frequencies	fellow	14.488	1.02869	Table S3A

## Sheet: C475
Postnatal Age (days)	Spatial Frequency (cpd)	Condition	Hemisphere	Analysis frequency	Eye	Mean Power (uV)	SD Power (uV)	Associated figure/table
30	0.05	pre-MD	right	2Hz + harmonics	deprived	10.2645	0.911279	Table S3B
51	0.05	post-MD / pre-TTX	right	2Hz + harmonics	deprived	17.8905	1.19422	Table S3B
53	0.05	during TTX	right	2Hz + harmonics	deprived	39.3556	2.2631	Table S3B
55	0.05	between TTX	right	2Hz + harmonics	deprived	37.2198	2.69457	Table S3B
57	0.05	between TTX	right	2Hz + harmonics	deprived	59.6573	1.92928	Table S3B
59	0.05	during TTX	right	2Hz + harmonics	deprived	58.0544	2.01831	Table S3B
61	0.05	during TTX	right	2Hz + harmonics	deprived	50.6944	1.4942	Table S3B
63	0.05	during TTX	right	2Hz + harmonics	deprived	71.4755	1.75611	Table S3B
65	0.05	during TTX	right	2Hz + harmonics	deprived	67.1332	2.81353	Table S3B
67	0.05	post-TTX	right	2Hz + harmonics	deprived	54.4078	3.32102	Table S3B
71	0.05	post-TTX	right	2Hz + harmonics	deprived	61.8171	2.02076	Table S3B
79	0.05	post-TTX	right	2Hz + harmonics	deprived	63.0886	1.89619	Table S3B
97	0.05	post-TTX	right	2Hz + harmonics	deprived	50.2789	2.04123	Table S3B
101	0.05	post-TTX	right	2Hz + harmonics	deprived	56.9339	3.90225	Table S3B
30	0.05	pre-MD	right	control frequencies	deprived	4.06657	0.333458	Table S3B
51	0.05	post-MD / pre-TTX	right	control frequencies	deprived	11.4214	0.647914	Table S3B
53	0.05	during TTX	right	control frequencies	deprived	15.0023	0.880505	Table S3B
55	0.05	between TTX	right	control frequencies	deprived	11.8842	0.931379	Table S3B
57	0.05	between TTX	right	control frequencies	deprived	15.4286	0.75177	Table S3B
59	0.05	during TTX	right	control frequencies	deprived	12.969	1.03947	Table S3B
61	0.05	during TTX	right	control frequencies	deprived	12.1749	0.735684	Table S3B
63	0.05	during TTX	right	control frequencies	deprived	14.4486	0.961591	Table S3B
65	0.05	during TTX	right	control frequencies	deprived	12.247	0.975633	Table S3B
67	0.05	post-TTX	right	control frequencies	deprived	13.1535	0.857638	Table S3B
71	0.05	post-TTX	right	control frequencies	deprived	16.3097	1.17756	Table S3B
79	0.05	post-TTX	right	control frequencies	deprived	16.7947	1.18155	Table S3B
97	0.05	post-TTX	right	control frequencies	deprived	19.8309	1.34577	Table S3B
101	0.05	post-TTX	right	control frequencies	deprived	16.1441	0.72717	Table S3B
30	0.05	pre-MD	right	2Hz + harmonics	fellow	11.0952	0.847378	Table S3B
51	0.05	post-MD / pre-TTX	right	2Hz + harmonics	fellow	48.5132	4.92716	Table S3B
53	0.05	during TTX	right	2Hz + harmonics	fellow	16.1346	0.942508	Table S3B
55	0.05	between TTX	right	2Hz + harmonics	fellow	35.5747	3.07163	Table S3B
57	0.05	between TTX	right	2Hz + harmonics	fellow	104.734	9.4034	Table S3B
59	0.05	during TTX	right	2Hz + harmonics	fellow	18.8058	1.61807	Table S3B
61	0.05	during TTX	right	2Hz + harmonics	fellow	18.7908	2.20084	Table S3B
63	0.05	during TTX	right	2Hz + harmonics	fellow	12.9448	0.744957	Table S3B
65	0.05	during TTX	right	2Hz + harmonics	fellow	18.4647	2.14317	Table S3B
67	0.05	post-TTX	right	2Hz + harmonics	fellow	53.5771	1.62284	Table S3B
71	0.05	post-TTX	right	2Hz + harmonics	fellow	64.65	1.45728	Table S3B
79	0.05	post-TTX	right	2Hz + harmonics	fellow	63.0287	3.52069	Table S3B
97	0.05	post-TTX	right	2Hz + harmonics	fellow	51.7258	2.64668	Table S3B
101	0.05	post-TTX	right	2Hz + harmonics	fellow	54.8545	2.23609	Table S3B
30	0.05	pre-MD	right	control frequencies	fellow	4.3756	0.26078	Table S3B
51	0.05	post-MD / pre-TTX	right	control frequencies	fellow	11.2856	0.501109	Table S3B
53	0.05	during TTX	right	control frequencies	fellow	13.4912	1.22332	Table S3B
55	0.05	between TTX	right	control frequencies	fellow	11.8048	0.645279	Table S3B
57	0.05	between TTX	right	control frequencies	fellow	16.6519	1.44288	Table S3B
59	0.05	during TTX	right	control frequencies	fellow	15.5543	0.952914	Table S3B
61	0.05	during TTX	right	control frequencies	fellow	13.7974	1.1084	Table S3B
63	0.05	during TTX	right	control frequencies	fellow	15.2516	1.06288	Table S3B
65	0.05	during TTX	right	control frequencies	fellow	13.9923	1.54679	Table S3B
67	0.05	post-TTX	right	control frequencies	fellow	11.3286	0.857638	Table S3B
71	0.05	post-TTX	right	control frequencies	fellow	14.1632	0.546562	Table S3B
79	0.05	post-TTX	right	control frequencies	fellow	15.4488	1.51936	Table S3B
97	0.05	post-TTX	right	control frequencies	fellow	14.7833	0.703835	Table S3B
101	0.05	post-TTX	right	control frequencies	fellow	14.5911	0.872691	Table S3B
30	0.1	pre-MD	right	2Hz + harmonics	deprived	9.93066	1.0426	Figs. 4G, S3B; Table S3B
51	0.1	post-MD / pre-TTX	right	2Hz + harmonics	deprived	15.5072	1.07123	Figs. 4G, S3B; Table S3B
53	0.1	during TTX	right	2Hz + harmonics	deprived	26.8545	1.97931	Figs. 4G, S3B; Table S3B
55	0.1	between TTX	right	2Hz + harmonics	deprived	28.6696	2.41275	Figs. 4G, S3B; Table S3B
57	0.1	between TTX	right	2Hz + harmonics	deprived	44.0674	3.89002	Figs. 4G, S3B; Table S3B
59	0.1	during TTX	right	2Hz + harmonics	deprived	48.6798	3.38038	Figs. 4G, S3B; Table S3B
61	0.1	during TTX	right	2Hz + harmonics	deprived	37.9973	2.68257	Figs. 4G, S3B; Table S3B
63	0.1	during TTX	right	2Hz + harmonics	deprived	64.7171	3.13267	Figs. 4G, S3B; Table S3B
65	0.1	during TTX	right	2Hz + harmonics	deprived	45.5509	9.95147	Figs. 4G, S3B; Table S3B
67	0.1	post-TTX	right	2Hz + harmonics	deprived	49.2161	3.32034	Figs. 4G, S3B; Table S3B
71	0.1	post-TTX	right	2Hz + harmonics	deprived	54.4706	3.02358	Figs. 4G, S3B; Table S3B
79	0.1	post-TTX	right	2Hz + harmonics	deprived	56.4031	2.25321	Figs. 4G, S3B; Table S3B
97	0.1	post-TTX	right	2Hz + harmonics	deprived	42.5788	1.70907	Figs. 4G, S3B; Table S3B
101	0.1	post-TTX	right	2Hz + harmonics	deprived	40.3082	5.58078	Figs. 4G, S3B; Table S3B
30	0.1	pre-MD	right	control frequencies	deprived	3.7706	0.23579	Table S3B
51	0.1	post-MD / pre-TTX	right	control frequencies	deprived	11.5168	0.621729	Table S3B
53	0.1	during TTX	right	control frequencies	deprived	12.246	0.726276	Table S3B
55	0.1	between TTX	right	control frequencies	deprived	13.3551	0.823358	Table S3B
57	0.1	between TTX	right	control frequencies	deprived	14.848	1.2417	Table S3B
59	0.1	during TTX	right	control frequencies	deprived	17.1115	1.7072	Table S3B
61	0.1	during TTX	right	control frequencies	deprived	14.4008	0.387961	Table S3B
63	0.1	during TTX	right	control frequencies	deprived	15.2511	0.588373	Table S3B
65	0.1	during TTX	right	control frequencies	deprived	15.054	2.18118	Table S3B
67	0.1	post-TTX	right	control frequencies	deprived	10.973	1.3218	Table S3B
71	0.1	post-TTX	right	control frequencies	deprived	16.5503	1.07774	Table S3B
79	0.1	post-TTX	right	control frequencies	deprived	17.0502	0.813502	Table S3B
97	0.1	post-TTX	right	control frequencies	deprived	19.1221	0.900639	Table S3B
101	0.1	post-TTX	right	control frequencies	deprived	16.3375	2.17528	Table S3B
30	0.1	pre-MD	right	2Hz + harmonics	fellow	11.0952	0.847378	Figs. 4G, S3B; Table S3B
51	0.1	post-MD / pre-TTX	right	2Hz + harmonics	fellow	42.6599	4.78146	Figs. 4G, S3B; Table S3B
53	0.1	during TTX	right	2Hz + harmonics	fellow	16.1128	1.44353	Figs. 4G, S3B; Table S3B
55	0.1	between TTX	right	2Hz + harmonics	fellow	33.6953	2.7197	Figs. 4G, S3B; Table S3B
57	0.1	between TTX	right	2Hz + harmonics	fellow	109.992	3.57007	Figs. 4G, S3B; Table S3B
59	0.1	during TTX	right	2Hz + harmonics	fellow	18.162	1.04192	Figs. 4G, S3B; Table S3B
61	0.1	during TTX	right	2Hz + harmonics	fellow	15.657	0.919425	Figs. 4G, S3B; Table S3B
63	0.1	during TTX	right	2Hz + harmonics	fellow	13.2032	1.61481	Figs. 4G, S3B; Table S3B
65	0.1	during TTX	right	2Hz + harmonics	fellow	13.2405	1.07013	Figs. 4G, S3B; Table S3B
67	0.1	post-TTX	right	2Hz + harmonics	fellow	45.7198	3.28729	Figs. 4G, S3B; Table S3B
71	0.1	post-TTX	right	2Hz + harmonics	fellow	57.9191	6.33731	Figs. 4G, S3B; Table S3B
79	0.1	post-TTX	right	2Hz + harmonics	fellow	49.1183	4.34237	Figs. 4G, S3B; Table S3B
97	0.1	post-TTX	right	2Hz + harmonics	fellow	41.9501	2.35249	Figs. 4G, S3B; Table S3B
101	0.1	post-TTX	right	2Hz + harmonics	fellow	42.4162	3.6786	Figs. 4G, S3B; Table S3B
30	0.1	pre-MD	right	control frequencies	fellow	4.3756	0.26078	Table S3B
51	0.1	post-MD / pre-TTX	right	control frequencies	fellow	12.6118	0.874295	Table S3B
53	0.1	during TTX	right	control frequencies	fellow	13.918	1.01809	Table S3B
55	0.1	between TTX	right	control frequencies	fellow	11.2485	1.24582	Table S3B
57	0.1	between TTX	right	control frequencies	fellow	18.3133	1.41418	Table S3B
59	0.1	during TTX	right	control frequencies	fellow	14.5885	1.15092	Table S3B
61	0.1	during TTX	right	control frequencies	fellow	12.5832	0.525412	Table S3B
63	0.1	during TTX	right	control frequencies	fellow	10.9338	1.39637	Table S3B
65	0.1	during TTX	right	control frequencies	fellow	11.8984	1.34681	Table S3B
67	0.1	post-TTX	right	control frequencies	fellow	12.1672	1.3218	Table S3B
71	0.1	post-TTX	right	control frequencies	fellow	17.0267	1.02834	Table S3B
79	0.1	post-TTX	right	control frequencies	fellow	15.8515	0.609316	Table S3B
97	0.1	post-TTX	right	control frequencies	fellow	17.9016	1.16637	Table S3B
101	0.1	post-TTX	right	control frequencies	fellow	16.0719	0.78183	Table S3B
30	0.5	pre-MD	right	2Hz + harmonics	deprived	3.90984	0.30241	Table S3B
51	0.5	post-MD / pre-TTX	right	2Hz + harmonics	deprived	14.4502	0.756519	Table S3B
53	0.5	during TTX	right	2Hz + harmonics	deprived	13.5525	0.80453	Table S3B
55	0.5	between TTX	right	2Hz + harmonics	deprived	18.3046	1.5274	Table S3B
57	0.5	between TTX	right	2Hz + harmonics	deprived	21.5955	2.08454	Table S3B
59	0.5	during TTX	right	2Hz + harmonics	deprived	23.832	1.12794	Table S3B
61	0.5	during TTX	right	2Hz + harmonics	deprived	17.683	1.13109	Table S3B
63	0.5	during TTX	right	2Hz + harmonics	deprived	23.6601	2.09662	Table S3B
65	0.5	during TTX	right	2Hz + harmonics	deprived	17.4679	1.19006	Table S3B
67	0.5	post-TTX	right	2Hz + harmonics	deprived	26.8027	2.32218	Table S3B
71	0.5	post-TTX	right	2Hz + harmonics	deprived	26.1811	2.79801	Table S3B
79	0.5	post-TTX	right	2Hz + harmonics	deprived	33.7653	1.88702	Table S3B
97	0.5	post-TTX	right	2Hz + harmonics	deprived	23.8521	2.04511	Table S3B
101	0.5	post-TTX	right	2Hz + harmonics	deprived	25.6287	3.9378	Table S3B
30	0.5	pre-MD	right	control frequencies	deprived	3.8296	0.286141	Table S3B
51	0.5	post-MD / pre-TTX	right	control frequencies	deprived	11.5442	0.88011	Table S3B
53	0.5	during TTX	right	control frequencies	deprived	14.0753	0.82992	Table S3B
55	0.5	between TTX	right	control frequencies	deprived	11.95	0.786972	Table S3B
57	0.5	between TTX	right	control frequencies	deprived	17.4629	1.79575	Table S3B
59	0.5	during TTX	right	control frequencies	deprived	12.5357	0.53854	Table S3B
61	0.5	during TTX	right	control frequencies	deprived	13.4985	0.728012	Table S3B
63	0.5	during TTX	right	control frequencies	deprived	13.1547	1.00728	Table S3B
65	0.5	during TTX	right	control frequencies	deprived	14.6679	2.85514	Table S3B
67	0.5	post-TTX	right	control frequencies	deprived	13.1584	1.20323	Table S3B
71	0.5	post-TTX	right	control frequencies	deprived	15.0478	0.955001	Table S3B
79	0.5	post-TTX	right	control frequencies	deprived	17.4661	1.12613	Table S3B
97	0.5	post-TTX	right	control frequencies	deprived	15.597	1.34273	Table S3B
101	0.5	post-TTX	right	control frequencies	deprived	17.7188	1.84317	Table S3B
30	0.5	pre-MD	right	2Hz + harmonics	fellow	5.08542	0.457715	Table S3B
51	0.5	post-MD / pre-TTX	right	2Hz + harmonics	fellow	33.1299	2.66852	Table S3B
53	0.5	during TTX	right	2Hz + harmonics	fellow	14.024	1.25753	Table S3B
55	0.5	between TTX	right	2Hz + harmonics	fellow	24.9929	2.43153	Table S3B
57	0.5	between TTX	right	2Hz + harmonics	fellow	75.3694	2.71999	Table S3B
59	0.5	during TTX	right	2Hz + harmonics	fellow	13.9046	0.939553	Table S3B
61	0.5	during TTX	right	2Hz + harmonics	fellow	13.7686	0.673095	Table S3B
63	0.5	during TTX	right	2Hz + harmonics	fellow	13.4747	1.03992	Table S3B
65	0.5	during TTX	right	2Hz + harmonics	fellow	11.9876	0.846663	Table S3B
67	0.5	post-TTX	right	2Hz + harmonics	fellow	18.6831	2.06521	Table S3B
71	0.5	post-TTX	right	2Hz + harmonics	fellow	35.9911	2.90715	Table S3B
79	0.5	post-TTX	right	2Hz + harmonics	fellow	22.2622	3.00225	Table S3B
97	0.5	post-TTX	right	2Hz + harmonics	fellow	25.9977	2.14522	Table S3B
101	0.5	post-TTX	right	2Hz + harmonics	fellow	29.0055	2.75252	Table S3B
30	0.5	pre-MD	right	control frequencies	fellow	3.87921	0.329645	Table S3B
51	0.5	post-MD / pre-TTX	right	control frequencies	fellow	12.7927	0.849664	Table S3B
53	0.5	during TTX	right	control frequencies	fellow	13.8693	1.40814	Table S3B
55	0.5	between TTX	right	control frequencies	fellow	11.9975	0.799734	Table S3B
57	0.5	between TTX	right	control frequencies	fellow	15.8031	0.949936	Table S3B
59	0.5	during TTX	right	control frequencies	fellow	13.677	0.917389	Table S3B
61	0.5	during TTX	right	control frequencies	fellow	13.0535	0.812719	Table S3B
63	0.5	during TTX	right	control frequencies	fellow	14.3763	1.04016	Table S3B
65	0.5	during TTX	right	control frequencies	fellow	13.7158	1.44196	Table S3B
67	0.5	post-TTX	right	control frequencies	fellow	11.7855	1.20323	Table S3B
71	0.5	post-TTX	right	control frequencies	fellow	17.3249	1.76684	Table S3B
79	0.5	post-TTX	right	control frequencies	fellow	15.3919	0.62909	Table S3B
97	0.5	post-TTX	right	control frequencies	fellow	17.6076	1.15471	Table S3B
101	0.5	post-TTX	right	control frequencies	fellow	15.3364	1.60228	Table S3B
30	grey	pre-MD	right	2Hz + harmonics	deprived	3.8213	0.280892	Table S3B
51	grey	post-MD / pre-TTX	right	2Hz + harmonics	deprived	12.9988	0.76595	Table S3B
53	grey	during TTX	right	2Hz + harmonics	deprived	12.8685	0.930006	Table S3B
55	grey	between TTX	right	2Hz + harmonics	deprived	12.3758	0.779013	Table S3B
57	grey	between TTX	right	2Hz + harmonics	deprived	16.1729	1.01114	Table S3B
59	grey	during TTX	right	2Hz + harmonics	deprived	14.682	0.567633	Table S3B
61	grey	during TTX	right	2Hz + harmonics	deprived	13.5825	0.882127	Table S3B
63	grey	during TTX	right	2Hz + harmonics	deprived	14.3608	0.791661	Table S3B
65	grey	during TTX	right	2Hz + harmonics	deprived	16.247	0.695073	Table S3B
67	grey	post-TTX	right	2Hz + harmonics	deprived	12.2036	1.52221	Table S3B
71	grey	post-TTX	right	2Hz + harmonics	deprived	19.5668	1.65855	Table S3B
79	grey	post-TTX	right	2Hz + harmonics	deprived	18.1925	1.53804	Table S3B
97	grey	post-TTX	right	2Hz + harmonics	deprived	17.9019	1.20937	Table S3B
101	grey	post-TTX	right	2Hz + harmonics	deprived	17.9804	1.68051	Table S3B
30	grey	pre-MD	right	control frequencies	deprived	3.50145	0.301142	Table S3B
51	grey	post-MD / pre-TTX	right	control frequencies	deprived	13.2316	0.746266	Table S3B
53	grey	during TTX	right	control frequencies	deprived	13.189	0.560173	Table S3B
55	grey	between TTX	right	control frequencies	deprived	11.2086	1.05305	Table S3B
57	grey	between TTX	right	control frequencies	deprived	15.066	0.850567	Table S3B
59	grey	during TTX	right	control frequencies	deprived	12.0859	1.02221	Table S3B
61	grey	during TTX	right	control frequencies	deprived	11.7536	0.819005	Table S3B
63	grey	during TTX	right	control frequencies	deprived	15.7871	1.20847	Table S3B
65	grey	during TTX	right	control frequencies	deprived	13.0893	0.951184	Table S3B
67	grey	post-TTX	right	control frequencies	deprived	12.6891	0.786193	Table S3B
71	grey	post-TTX	right	control frequencies	deprived	16.2044	1.21074	Table S3B
79	grey	post-TTX	right	control frequencies	deprived	18.1552	1.04654	Table S3B
97	grey	post-TTX	right	control frequencies	deprived	16.0844	1.07938	Table S3B
101	grey	post-TTX	right	control frequencies	deprived	16.2265	1.42485	Table S3B
30	grey	pre-MD	right	2Hz + harmonics	fellow	4.43264	0.258946	Table S3B
51	grey	post-MD / pre-TTX	right	2Hz + harmonics	fellow	13.6897	0.553254	Table S3B
53	grey	during TTX	right	2Hz + harmonics	fellow	13.8797	1.26619	Table S3B
55	grey	between TTX	right	2Hz + harmonics	fellow	11.3428	0.744644	Table S3B
57	grey	between TTX	right	2Hz + harmonics	fellow	14.4003	1.00851	Table S3B
59	grey	during TTX	right	2Hz + harmonics	fellow	14.6388	0.799969	Table S3B
61	grey	during TTX	right	2Hz + harmonics	fellow	13.0477	1.28772	Table S3B
63	grey	during TTX	right	2Hz + harmonics	fellow	12.8638	1.29261	Table S3B
65	grey	during TTX	right	2Hz + harmonics	fellow	13.1054	1.25239	Table S3B
67	grey	post-TTX	right	2Hz + harmonics	fellow	13.7375	0.840411	Table S3B
71	grey	post-TTX	right	2Hz + harmonics	fellow	16.1027	0.745589	Table S3B
79	grey	post-TTX	right	2Hz + harmonics	fellow	17.641	1.18086	Table S3B
97	grey	post-TTX	right	2Hz + harmonics	fellow	16.5417	1.26923	Table S3B
101	grey	post-TTX	right	2Hz + harmonics	fellow	17.2517	1.76026	Table S3B
30	grey	pre-MD	right	control frequencies	fellow	4.49332	0.462915	Table S3B
51	grey	post-MD / pre-TTX	right	control frequencies	fellow	12.7252	1.04171	Table S3B
53	grey	during TTX	right	control frequencies	fellow	13.4092	0.838323	Table S3B
55	grey	between TTX	right	control frequencies	fellow	11.9681	0.899233	Table S3B
57	grey	between TTX	right	control frequencies	fellow	14.212	1.68916	Table S3B
59	grey	during TTX	right	control frequencies	fellow	13.2851	1.04688	Table S3B
61	grey	during TTX	right	control frequencies	fellow	13.654	0.885436	Table S3B
63	grey	during TTX	right	control frequencies	fellow	11.6939	0.850094	Table S3B
65	grey	during TTX	right	control frequencies	fellow	14.6058	0.757902	Table S3B
67	grey	post-TTX	right	control frequencies	fellow	12.7595	0.786193	Table S3B
71	grey	post-TTX	right	control frequencies	fellow	17.2324	1.06426	Table S3B
79	grey	post-TTX	right	control frequencies	fellow	16.0469	0.620185	Table S3B
97	grey	post-TTX	right	control frequencies	fellow	18.8071	1.52085	Table S3B
101	grey	post-TTX	right	control frequencies	fellow	18.3345	1.39219	Table S3B
30	0.05	pre-MD	left	2Hz + harmonics	deprived	10.1223	0.962075	Table S3B
51	0.05	post-MD / pre-TTX	left	2Hz + harmonics	deprived	18.3943	1.04922	Table S3B
53	0.05	during TTX	left	2Hz + harmonics	deprived	37.5931	2.24788	Table S3B
55	0.05	between TTX	left	2Hz + harmonics	deprived	37.8588	2.58539	Table S3B
57	0.05	between TTX	left	2Hz + harmonics	deprived	53.7417	2.15211	Table S3B
59	0.05	during TTX	left	2Hz + harmonics	deprived	59.5278	2.04538	Table S3B
61	0.05	during TTX	left	2Hz + harmonics	deprived	52.1273	1.29821	Table S3B
63	0.05	during TTX	left	2Hz + harmonics	deprived	73.9142	2.02027	Table S3B
65	0.05	during TTX	left	2Hz + harmonics	deprived	67.1332	2.81353	Table S3B
67	0.05	post-TTX	left	2Hz + harmonics	deprived	57.3558	3.3646	Table S3B
71	0.05	post-TTX	left	2Hz + harmonics	deprived	71.1817	2.21164	Table S3B
79	0.05	post-TTX	left	2Hz + harmonics	deprived	64.8421	2.04839	Table S3B
97	0.05	post-TTX	left	2Hz + harmonics	deprived	59.0823	3.15653	Table S3B
101	0.05	post-TTX	left	2Hz + harmonics	deprived	56.866	3.97739	Table S3B
30	0.05	pre-MD	left	control frequencies	deprived	4.225	0.386243	Table S3B
51	0.05	post-MD / pre-TTX	left	control frequencies	deprived	12.2522	0.631635	Table S3B
53	0.05	during TTX	left	control frequencies	deprived	14.9934	0.788609	Table S3B
55	0.05	between TTX	left	control frequencies	deprived	12.7136	1.22171	Table S3B
57	0.05	between TTX	left	control frequencies	deprived	15.4058	1.05134	Table S3B
59	0.05	during TTX	left	control frequencies	deprived	13.5007	1.29835	Table S3B
61	0.05	during TTX	left	control frequencies	deprived	13.0823	0.738069	Table S3B
63	0.05	during TTX	left	control frequencies	deprived	15.0455	1.0332	Table S3B
65	0.05	during TTX	left	control frequencies	deprived	12.247	0.975633	Table S3B
67	0.05	post-TTX	left	control frequencies	deprived	13.6994	0.476049	Table S3B
71	0.05	post-TTX	left	control frequencies	deprived	16.7846	1.17848	Table S3B
79	0.05	post-TTX	left	control frequencies	deprived	16.6234	1.22338	Table S3B
97	0.05	post-TTX	left	control frequencies	deprived	20.4217	1.54213	Table S3B
101	0.05	post-TTX	left	control frequencies	deprived	15.7308	0.95031	Table S3B
30	0.05	pre-MD	left	2Hz + harmonics	fellow	11.3201	0.862149	Table S3B
51	0.05	post-MD / pre-TTX	left	2Hz + harmonics	fellow	50.8927	5.4247	Table S3B
53	0.05	during TTX	left	2Hz + harmonics	fellow	16.7736	0.972469	Table S3B
55	0.05	between TTX	left	2Hz + harmonics	fellow	41.0445	4.16875	Table S3B
57	0.05	between TTX	left	2Hz + harmonics	fellow	99.2475	8.92462	Table S3B
59	0.05	during TTX	left	2Hz + harmonics	fellow	19.0484	1.96253	Table S3B
61	0.05	during TTX	left	2Hz + harmonics	fellow	19.5453	2.08853	Table S3B
63	0.05	during TTX	left	2Hz + harmonics	fellow	13.1168	0.896585	Table S3B
65	0.05	during TTX	left	2Hz + harmonics	fellow	18.4647	2.14317	Table S3B
67	0.05	post-TTX	left	2Hz + harmonics	fellow	58.6132	1.80649	Table S3B
71	0.05	post-TTX	left	2Hz + harmonics	fellow	74.0674	1.30191	Table S3B
79	0.05	post-TTX	left	2Hz + harmonics	fellow	64.4914	3.63859	Table S3B
97	0.05	post-TTX	left	2Hz + harmonics	fellow	60.6165	3.21059	Table S3B
101	0.05	post-TTX	left	2Hz + harmonics	fellow	53.684	2.58951	Table S3B
30	0.05	pre-MD	left	control frequencies	fellow	4.51385	0.275027	Table S3B
51	0.05	post-MD / pre-TTX	left	control frequencies	fellow	11.6511	0.690546	Table S3B
53	0.05	during TTX	left	control frequencies	fellow	14.179	1.12842	Table S3B
55	0.05	between TTX	left	control frequencies	fellow	12.645	0.855692	Table S3B
57	0.05	between TTX	left	control frequencies	fellow	17.096	1.22738	Table S3B
59	0.05	during TTX	left	control frequencies	fellow	14.9825	0.974569	Table S3B
61	0.05	during TTX	left	control frequencies	fellow	13.7339	0.993667	Table S3B
63	0.05	during TTX	left	control frequencies	fellow	15.3003	1.19397	Table S3B
65	0.05	during TTX	left	control frequencies	fellow	13.9923	1.54679	Table S3B
67	0.05	post-TTX	left	control frequencies	fellow	11.9628	0.679505	Table S3B
71	0.05	post-TTX	left	control frequencies	fellow	14.541	0.657052	Table S3B
79	0.05	post-TTX	left	control frequencies	fellow	15.5021	1.41932	Table S3B
97	0.05	post-TTX	left	control frequencies	fellow	17.5294	0.785253	Table S3B
101	0.05	post-TTX	left	control frequencies	fellow	15.0917	0.989202	Table S3B
30	0.1	pre-MD	left	2Hz + harmonics	deprived	9.93599	1.03153	Figs. 4G, S3B; Table S3B
51	0.1	post-MD / pre-TTX	left	2Hz + harmonics	deprived	15.6533	1.08058	Figs. 4G, S3B; Table S3B
53	0.1	during TTX	left	2Hz + harmonics	deprived	27.0766	1.94095	Figs. 4G, S3B; Table S3B
55	0.1	between TTX	left	2Hz + harmonics	deprived	31.6015	2.36893	Figs. 4G, S3B; Table S3B
57	0.1	between TTX	left	2Hz + harmonics	deprived	41.409	3.5421	Figs. 4G, S3B; Table S3B
59	0.1	during TTX	left	2Hz + harmonics	deprived	51.3536	3.30165	Figs. 4G, S3B; Table S3B
61	0.1	during TTX	left	2Hz + harmonics	deprived	38.2631	2.91447	Figs. 4G, S3B; Table S3B
63	0.1	during TTX	left	2Hz + harmonics	deprived	66.3087	3.19629	Figs. 4G, S3B; Table S3B
65	0.1	during TTX	left	2Hz + harmonics	deprived	45.5509	9.95147	Figs. 4G, S3B; Table S3B
67	0.1	post-TTX	left	2Hz + harmonics	deprived	50.9636	3.21037	Figs. 4G, S3B; Table S3B
71	0.1	post-TTX	left	2Hz + harmonics	deprived	62.3543	3.51888	Figs. 4G, S3B; Table S3B
79	0.1	post-TTX	left	2Hz + harmonics	deprived	58.6556	2.31826	Figs. 4G, S3B; Table S3B
97	0.1	post-TTX	left	2Hz + harmonics	deprived	52.3263	2.1604	Figs. 4G, S3B; Table S3B
101	0.1	post-TTX	left	2Hz + harmonics	deprived	41.0742	5.29294	Figs. 4G, S3B; Table S3B
30	0.1	pre-MD	left	control frequencies	deprived	3.8282	0.239895	Table S3B
51	0.1	post-MD / pre-TTX	left	control frequencies	deprived	11.8554	0.623943	Table S3B
53	0.1	during TTX	left	control frequencies	deprived	12.2415	0.794332	Table S3B
55	0.1	between TTX	left	control frequencies	deprived	13.4456	0.989814	Table S3B
57	0.1	between TTX	left	control frequencies	deprived	15.4996	0.879167	Table S3B
59	0.1	during TTX	left	control frequencies	deprived	17.4189	1.53424	Table S3B
61	0.1	during TTX	left	control frequencies	deprived	13.4332	0.454618	Table S3B
63	0.1	during TTX	left	control frequencies	deprived	15.4295	0.853568	Table S3B
65	0.1	during TTX	left	control frequencies	deprived	15.054	2.18118	Table S3B
67	0.1	post-TTX	left	control frequencies	deprived	11.1557	1.36091	Table S3B
71	0.1	post-TTX	left	control frequencies	deprived	17.4321	1.03319	Table S3B
79	0.1	post-TTX	left	control frequencies	deprived	17.1199	0.985773	Table S3B
97	0.1	post-TTX	left	control frequencies	deprived	21.6221	0.876631	Table S3B
101	0.1	post-TTX	left	control frequencies	deprived	16.1607	1.95364	Table S3B
30	0.1	pre-MD	left	2Hz + harmonics	fellow	9.61312	0.496173	Figs. 4G, S3B; Table S3B
51	0.1	post-MD / pre-TTX	left	2Hz + harmonics	fellow	44.3869	5.70034	Figs. 4G, S3B; Table S3B
53	0.1	during TTX	left	2Hz + harmonics	fellow	15.642	1.34057	Figs. 4G, S3B; Table S3B
55	0.1	between TTX	left	2Hz + harmonics	fellow	36.2669	3.1721	Figs. 4G, S3B; Table S3B
57	0.1	between TTX	left	2Hz + harmonics	fellow	104.697	3.62118	Figs. 4G, S3B; Table S3B
59	0.1	during TTX	left	2Hz + harmonics	fellow	19.4818	1.1649	Figs. 4G, S3B; Table S3B
61	0.1	during TTX	left	2Hz + harmonics	fellow	15.8423	1.04129	Figs. 4G, S3B; Table S3B
63	0.1	during TTX	left	2Hz + harmonics	fellow	13.347	1.75608	Figs. 4G, S3B; Table S3B
65	0.1	during TTX	left	2Hz + harmonics	fellow	13.2405	1.07013	Figs. 4G, S3B; Table S3B
67	0.1	post-TTX	left	2Hz + harmonics	fellow	49.6086	3.54006	Figs. 4G, S3B; Table S3B
71	0.1	post-TTX	left	2Hz + harmonics	fellow	66.6101	6.39706	Figs. 4G, S3B; Table S3B
79	0.1	post-TTX	left	2Hz + harmonics	fellow	51.4247	4.4549	Figs. 4G, S3B; Table S3B
97	0.1	post-TTX	left	2Hz + harmonics	fellow	49.8349	2.60239	Figs. 4G, S3B; Table S3B
101	0.1	post-TTX	left	2Hz + harmonics	fellow	42.636	3.56947	Figs. 4G, S3B; Table S3B
30	0.1	pre-MD	left	control frequencies	fellow	4.00538	0.211737	Table S3B
51	0.1	post-MD / pre-TTX	left	control frequencies	fellow	12.8901	0.875088	Table S3B
53	0.1	during TTX	left	control frequencies	fellow	14.5664	1.09423	Table S3B
55	0.1	between TTX	left	control frequencies	fellow	11.3703	1.28267	Table S3B
57	0.1	between TTX	left	control frequencies	fellow	18.6597	1.31617	Table S3B
59	0.1	during TTX	left	control frequencies	fellow	14.4192	1.03398	Table S3B
61	0.1	during TTX	left	control frequencies	fellow	12.9659	0.437773	Table S3B
63	0.1	during TTX	left	control frequencies	fellow	10.4369	1.3433	Table S3B
65	0.1	during TTX	left	control frequencies	fellow	11.8984	1.34681	Table S3B
67	0.1	post-TTX	left	control frequencies	fellow	12.9228	0.58175	Table S3B
71	0.1	post-TTX	left	control frequencies	fellow	17.3337	1.14529	Table S3B
79	0.1	post-TTX	left	control frequencies	fellow	16.0006	0.614495	Table S3B
97	0.1	post-TTX	left	control frequencies	fellow	19.2713	1.13882	Table S3B
101	0.1	post-TTX	left	control frequencies	fellow	16.3142	0.945806	Table S3B
30	0.5	pre-MD	left	2Hz + harmonics	deprived	3.98413	0.30406	Table S3B
51	0.5	post-MD / pre-TTX	left	2Hz + harmonics	deprived	15.3996	0.770289	Table S3B
53	0.5	during TTX	left	2Hz + harmonics	deprived	13.3732	0.833237	Table S3B
55	0.5	between TTX	left	2Hz + harmonics	deprived	20.8678	1.7979	Table S3B
57	0.5	between TTX	left	2Hz + harmonics	deprived	20.6563	1.97328	Table S3B
59	0.5	during TTX	left	2Hz + harmonics	deprived	24.9223	1.2521	Table S3B
61	0.5	during TTX	left	2Hz + harmonics	deprived	17.5903	1.08491	Table S3B
63	0.5	during TTX	left	2Hz + harmonics	deprived	24.5442	2.19398	Table S3B
65	0.5	during TTX	left	2Hz + harmonics	deprived	17.4679	1.19006	Table S3B
67	0.5	post-TTX	left	2Hz + harmonics	deprived	27.6306	2.27812	Table S3B
71	0.5	post-TTX	left	2Hz + harmonics	deprived	27.9958	2.94159	Table S3B
79	0.5	post-TTX	left	2Hz + harmonics	deprived	34.7788	2.23234	Table S3B
97	0.5	post-TTX	left	2Hz + harmonics	deprived	29.5268	2.21899	Table S3B
101	0.5	post-TTX	left	2Hz + harmonics	deprived	27.8606	4.22626	Table S3B
30	0.5	pre-MD	left	control frequencies	deprived	3.83796	0.311664	Table S3B
51	0.5	post-MD / pre-TTX	left	control frequencies	deprived	12.3536	0.98488	Table S3B
53	0.5	during TTX	left	control frequencies	deprived	14.2595	1.0175	Table S3B
55	0.5	between TTX	left	control frequencies	deprived	11.4238	0.870984	Table S3B
57	0.5	between TTX	left	control frequencies	deprived	17.5625	1.69805	Table S3B
59	0.5	during TTX	left	control frequencies	deprived	12.9503	0.838009	Table S3B
61	0.5	during TTX	left	control frequencies	deprived	13.8857	0.742882	Table S3B
63	0.5	during TTX	left	control frequencies	deprived	13.8649	0.96981	Table S3B
65	0.5	during TTX	left	control frequencies	deprived	14.6679	2.85514	Table S3B
67	0.5	post-TTX	left	control frequencies	deprived	13.5239	1.32511	Table S3B
71	0.5	post-TTX	left	control frequencies	deprived	15.7633	0.838544	Table S3B
79	0.5	post-TTX	left	control frequencies	deprived	17.1441	1.15491	Table S3B
97	0.5	post-TTX	left	control frequencies	deprived	17.238	1.07161	Table S3B
101	0.5	post-TTX	left	control frequencies	deprived	17.2655	1.54312	Table S3B
30	0.5	pre-MD	left	2Hz + harmonics	fellow	5.0952	0.437053	Table S3B
51	0.5	post-MD / pre-TTX	left	2Hz + harmonics	fellow	33.5705	2.82415	Table S3B
53	0.5	during TTX	left	2Hz + harmonics	fellow	14.7265	1.39098	Table S3B
55	0.5	between TTX	left	2Hz + harmonics	fellow	27.045	2.84794	Table S3B
57	0.5	between TTX	left	2Hz + harmonics	fellow	71.7993	2.85203	Table S3B
59	0.5	during TTX	left	2Hz + harmonics	fellow	13.6311	1.03181	Table S3B
61	0.5	during TTX	left	2Hz + harmonics	fellow	13.295	0.69818	Table S3B
63	0.5	during TTX	left	2Hz + harmonics	fellow	13.8262	0.906791	Table S3B
65	0.5	during TTX	left	2Hz + harmonics	fellow	11.9876	0.846663	Table S3B
67	0.5	post-TTX	left	2Hz + harmonics	fellow	20.0938	2.41955	Table S3B
71	0.5	post-TTX	left	2Hz + harmonics	fellow	39.6172	3.3642	Table S3B
79	0.5	post-TTX	left	2Hz + harmonics	fellow	23.3363	3.0603	Table S3B
97	0.5	post-TTX	left	2Hz + harmonics	fellow	30.4832	3.42863	Table S3B
101	0.5	post-TTX	left	2Hz + harmonics	fellow	30.0918	2.56112	Table S3B
30	0.5	pre-MD	left	control frequencies	fellow	3.92854	0.361882	Table S3B
51	0.5	post-MD / pre-TTX	left	control frequencies	fellow	13.5234	0.935342	Table S3B
53	0.5	during TTX	left	control frequencies	fellow	14.2494	1.47822	Table S3B
55	0.5	between TTX	left	control frequencies	fellow	12.3913	0.640407	Table S3B
57	0.5	between TTX	left	control frequencies	fellow	15.9534	0.944808	Table S3B
59	0.5	during TTX	left	control frequencies	fellow	13.8913	1.0012	Table S3B
61	0.5	during TTX	left	control frequencies	fellow	12.9665	0.899644	Table S3B
63	0.5	during TTX	left	control frequencies	fellow	14.1357	1.02129	Table S3B
65	0.5	during TTX	left	control frequencies	fellow	13.7158	1.44196	Table S3B
67	0.5	post-TTX	left	control frequencies	fellow	12.5167	0.893514	Table S3B
71	0.5	post-TTX	left	control frequencies	fellow	17.0029	1.92962	Table S3B
79	0.5	post-TTX	left	control frequencies	fellow	15.5152	0.575472	Table S3B
97	0.5	post-TTX	left	control frequencies	fellow	18.5241	1.16629	Table S3B
101	0.5	post-TTX	left	control frequencies	fellow	15.5982	1.65769	Table S3B
30	grey	pre-MD	left	2Hz + harmonics	deprived	3.80628	0.327047	Table S3B
51	grey	post-MD / pre-TTX	left	2Hz + harmonics	deprived	13.7449	0.908136	Table S3B
53	grey	during TTX	left	2Hz + harmonics	deprived	12.7416	0.995188	Table S3B
55	grey	between TTX	left	2Hz + harmonics	deprived	12.7426	0.797142	Table S3B
57	grey	between TTX	left	2Hz + harmonics	deprived	16.154	0.845978	Table S3B
59	grey	during TTX	left	2Hz + harmonics	deprived	15.4239	1.24004	Table S3B
61	grey	during TTX	left	2Hz + harmonics	deprived	13.4783	0.964505	Table S3B
63	grey	during TTX	left	2Hz + harmonics	deprived	14.5495	0.753116	Table S3B
65	grey	during TTX	left	2Hz + harmonics	deprived	16.247	0.695073	Table S3B
67	grey	post-TTX	left	2Hz + harmonics	deprived	13.5208	1.42278	Table S3B
71	grey	post-TTX	left	2Hz + harmonics	deprived	19.187	1.71319	Table S3B
79	grey	post-TTX	left	2Hz + harmonics	deprived	18.119	1.60621	Table S3B
97	grey	post-TTX	left	2Hz + harmonics	deprived	18.8847	1.42591	Table S3B
101	grey	post-TTX	left	2Hz + harmonics	deprived	18.1275	1.48184	Table S3B
30	grey	pre-MD	left	control frequencies	deprived	3.47956	0.315269	Table S3B
51	grey	post-MD / pre-TTX	left	control frequencies	deprived	13.9149	0.926583	Table S3B
53	grey	during TTX	left	control frequencies	deprived	13.5931	0.725463	Table S3B
55	grey	between TTX	left	control frequencies	deprived	11.8175	0.844114	Table S3B
57	grey	between TTX	left	control frequencies	deprived	15.6876	1.02815	Table S3B
59	grey	during TTX	left	control frequencies	deprived	12.9394	1.22297	Table S3B
61	grey	during TTX	left	control frequencies	deprived	11.8029	0.875095	Table S3B
63	grey	during TTX	left	control frequencies	deprived	15.7144	1.08267	Table S3B
65	grey	during TTX	left	control frequencies	deprived	13.0893	0.951184	Table S3B
67	grey	post-TTX	left	control frequencies	deprived	12.3266	0.380982	Table S3B
71	grey	post-TTX	left	control frequencies	deprived	17.2469	0.781163	Table S3B
79	grey	post-TTX	left	control frequencies	deprived	18.2095	1.12264	Table S3B
97	grey	post-TTX	left	control frequencies	deprived	18.5345	1.26569	Table S3B
101	grey	post-TTX	left	control frequencies	deprived	16.779	1.4779	Table S3B
30	grey	pre-MD	left	2Hz + harmonics	fellow	4.64658	0.27132	Table S3B
51	grey	post-MD / pre-TTX	left	2Hz + harmonics	fellow	14.1795	0.747919	Table S3B
53	grey	during TTX	left	2Hz + harmonics	fellow	14.6027	1.30225	Table S3B
55	grey	between TTX	left	2Hz + harmonics	fellow	11.6233	0.587383	Table S3B
57	grey	between TTX	left	2Hz + harmonics	fellow	14.9224	1.07242	Table S3B
59	grey	during TTX	left	2Hz + harmonics	fellow	13.5882	1.08169	Table S3B
61	grey	during TTX	left	2Hz + harmonics	fellow	13.0061	1.22916	Table S3B
63	grey	during TTX	left	2Hz + harmonics	fellow	12.6642	1.28704	Table S3B
65	grey	during TTX	left	2Hz + harmonics	fellow	13.1054	1.25239	Table S3B
67	grey	post-TTX	left	2Hz + harmonics	fellow	13.713	0.899461	Table S3B
71	grey	post-TTX	left	2Hz + harmonics	fellow	16.8524	0.510776	Table S3B
79	grey	post-TTX	left	2Hz + harmonics	fellow	17.6523	1.25748	Table S3B
97	grey	post-TTX	left	2Hz + harmonics	fellow	17.591	0.825125	Table S3B
101	grey	post-TTX	left	2Hz + harmonics	fellow	17.2458	1.60945	Table S3B
30	grey	pre-MD	left	control frequencies	fellow	4.63648	0.384229	Table S3B
51	grey	post-MD / pre-TTX	left	control frequencies	fellow	12.9126	0.973152	Table S3B
53	grey	during TTX	left	control frequencies	fellow	13.6078	0.837963	Table S3B
55	grey	between TTX	left	control frequencies	fellow	12.3465	1.10045	Table S3B
57	grey	between TTX	left	control frequencies	fellow	13.5661	1.59599	Table S3B
59	grey	during TTX	left	control frequencies	fellow	13.6103	0.974095	Table S3B
61	grey	during TTX	left	control frequencies	fellow	13.964	0.877138	Table S3B
63	grey	during TTX	left	control frequencies	fellow	12.3406	1.04204	Table S3B
65	grey	during TTX	left	control frequencies	fellow	14.6058	0.757902	Table S3B
67	grey	post-TTX	left	control frequencies	fellow	13.1789	0.776819	Table S3B
71	grey	post-TTX	left	control frequencies	fellow	18.0668	1.25415	Table S3B
79	grey	post-TTX	left	control frequencies	fellow	16.2329	0.580926	Table S3B
97	grey	post-TTX	left	control frequencies	fellow	20.531	1.6328	Table S3B
101	grey	post-TTX	left	control frequencies	fellow	18.0804	1.50482	Table S3B

## Sheet: C476
Postnatal Age (days)	Spatial Frequency (cpd)	Condition	Hemisphere	Analysis frequency	Eye	Mean Power (uV)	SD Power (uV)	Associated figure/table
30	0.05	pre-MD	right	2Hz + harmonics	deprived	13.8138	0.762353	Table S3C
51	0.05	post-MD / pre-TTX	right	2Hz + harmonics	deprived	16.8251	1.29995	Table S3C
59	0.05	post-MD / pre-TTX	right	2Hz + harmonics	deprived	27.949	0.605938	Table S3C
61	0.05	during TTX	right	2Hz + harmonics	deprived	65.6974	1.81782	Table S3C
63	0.05	during TTX	right	2Hz + harmonics	deprived	86.9908	2.84198	Table S3C
65	0.05	during TTX	right	2Hz + harmonics	deprived	79.539	2.1943	Table S3C
67	0.05	during TTX	right	2Hz + harmonics	deprived	108.579	4.52051	Fig. 4C; Table S3C
69	0.05	post-TTX	right	2Hz + harmonics	deprived	62.7655	1.62562	Table S3C
79	0.05	post-TTX	right	2Hz + harmonics	deprived	75.172	2.59964	Table S3C
85	0.05	post-TTX	right	2Hz + harmonics	deprived	45.3115	1.67543	Table S3C
101	0.05	post-TTX	right	2Hz + harmonics	deprived	68.8851	2.3405	Table S3C
30	0.05	pre-MD	right	control frequencies	deprived	4.20197	0.316316	Table S3C
51	0.05	post-MD / pre-TTX	right	control frequencies	deprived	11.7814	0.774784	Table S3C
59	0.05	post-MD / pre-TTX	right	control frequencies	deprived	13.2919	0.705456	Table S3C
61	0.05	during TTX	right	control frequencies	deprived	15.0066	0.705888	Table S3C
63	0.05	during TTX	right	control frequencies	deprived	18.0683	1.02381	Table S3C
65	0.05	during TTX	right	control frequencies	deprived	14.1526	0.823256	Table S3C
67	0.05	during TTX	right	control frequencies	deprived	15.9695	1.229	Fig. 4C; Table S3C
69	0.05	post-TTX	right	control frequencies	deprived	15.4716	1.22469	Table S3C
79	0.05	post-TTX	right	control frequencies	deprived	15.7797	0.852549	Table S3C
85	0.05	post-TTX	right	control frequencies	deprived	10.867	1.27338	Table S3C
101	0.05	post-TTX	right	control frequencies	deprived	17.5147	0.948048	Table S3C
30	0.05	pre-MD	right	2Hz + harmonics	fellow	12.8981	0.586809	Table S3C
51	0.05	post-MD / pre-TTX	right	2Hz + harmonics	fellow	112.414	5.92071	Table S3C
59	0.05	post-MD / pre-TTX	right	2Hz + harmonics	fellow	102.296	3.85022	Table S3C
61	0.05	during TTX	right	2Hz + harmonics	fellow	14.7832	0.983949	Table S3C
63	0.05	during TTX	right	2Hz + harmonics	fellow	16.7337	1.49426	Table S3C
65	0.05	during TTX	right	2Hz + harmonics	fellow	25.1151	3.44684	Table S3C
67	0.05	during TTX	right	2Hz + harmonics	fellow	17.4116	1.48719	Table S3C
69	0.05	post-TTX	right	2Hz + harmonics	fellow	49.9009	2.13494	Table S3C
79	0.05	post-TTX	right	2Hz + harmonics	fellow	75.8597	8.85386	Table S3C
85	0.05	post-TTX	right	2Hz + harmonics	fellow	43.612	4.37828	Table S3C
101	0.05	post-TTX	right	2Hz + harmonics	fellow	68.2136	6.15489	Table S3C
30	0.05	pre-MD	right	control frequencies	fellow	4.86138	0.382738	Table S3C
51	0.05	post-MD / pre-TTX	right	control frequencies	fellow	13.4199	0.715096	Table S3C
59	0.05	post-MD / pre-TTX	right	control frequencies	fellow	12.4528	0.440509	Table S3C
61	0.05	during TTX	right	control frequencies	fellow	13.7392	0.980109	Table S3C
63	0.05	during TTX	right	control frequencies	fellow	16.7595	1.05918	Table S3C
65	0.05	during TTX	right	control frequencies	fellow	17.6907	1.25986	Table S3C
67	0.05	during TTX	right	control frequencies	fellow	14.9565	0.958556	Table S3C
69	0.05	post-TTX	right	control frequencies	fellow	13.3776	0.740692	Table S3C
79	0.05	post-TTX	right	control frequencies	fellow	15.4602	0.688733	Table S3C
85	0.05	post-TTX	right	control frequencies	fellow	14.7773	1.03051	Table S3C
101	0.05	post-TTX	right	control frequencies	fellow	16.1433	0.837959	Table S3C
30	0.1	pre-MD	right	2Hz + harmonics	deprived	9.47593	0.733798	Figs. 4G, S3C; Table S3C
51	0.1	post-MD / pre-TTX	right	2Hz + harmonics	deprived	16.0172	0.775054	Figs. 4G, S3C; Table S3C
59	0.1	post-MD / pre-TTX	right	2Hz + harmonics	deprived	26.9085	2.20855	Figs. 4G, S3C; Table S3C
61	0.1	during TTX	right	2Hz + harmonics	deprived	48.656	3.37032	Figs. 4G, S3C; Table S3C
63	0.1	during TTX	right	2Hz + harmonics	deprived	74.4247	3.49558	Figs. 4G, S3C; Table S3C
65	0.1	during TTX	right	2Hz + harmonics	deprived	66.4404	6.45167	Figs. 4G, S3C; Table S3C
67	0.1	during TTX	right	2Hz + harmonics	deprived	86.8298	4.95829	Figs. 4C, 4G S3C; Table S3C
69	0.1	post-TTX	right	2Hz + harmonics	deprived	57.1063	3.75212	Figs. 4G, S3C; Table S3C
79	0.1	post-TTX	right	2Hz + harmonics	deprived	74.6294	5.31416	Figs. 4G, S3C; Table S3C
85	0.1	post-TTX	right	2Hz + harmonics	deprived	44.5781	1.68152	Figs. 4G, S3C; Table S3C
101	0.1	post-TTX	right	2Hz + harmonics	deprived	73.939	9.26667	Figs. 4G, S3C; Table S3C
30	0.1	pre-MD	right	control frequencies	deprived	4.46639	0.265348	Table S3C
51	0.1	post-MD / pre-TTX	right	control frequencies	deprived	12.8086	0.582521	Table S3C
59	0.1	post-MD / pre-TTX	right	control frequencies	deprived	14.2522	1.04137	Table S3C
61	0.1	during TTX	right	control frequencies	deprived	15.1261	0.913871	Table S3C
63	0.1	during TTX	right	control frequencies	deprived	17.6709	1.2869	Table S3C
65	0.1	during TTX	right	control frequencies	deprived	15.4746	0.959146	Table S3C
67	0.1	during TTX	right	control frequencies	deprived	13.0657	0.662049	Fig. 4C; Table S3C
69	0.1	post-TTX	right	control frequencies	deprived	14.4934	0.657082	Table S3C
79	0.1	post-TTX	right	control frequencies	deprived	20.2688	1.21323	Table S3C
85	0.1	post-TTX	right	control frequencies	deprived	13.989	2.21398	Table S3C
101	0.1	post-TTX	right	control frequencies	deprived	17.0375	1.17952	Table S3C
30	0.1	pre-MD	right	2Hz + harmonics	fellow	10.6506	0.884054	Figs. 4G, S3C; Table S3C
51	0.1	post-MD / pre-TTX	right	2Hz + harmonics	fellow	103.818	4.74014	Figs. 4G, S3C; Table S3C
59	0.1	post-MD / pre-TTX	right	2Hz + harmonics	fellow	111.241	5.09406	Figs. 4G, S3C; Table S3C
61	0.1	during TTX	right	2Hz + harmonics	fellow	15.1684	1.36713	Figs. 4G, S3C; Table S3C
63	0.1	during TTX	right	2Hz + harmonics	fellow	17.6552	0.85146	Figs. 4G, S3C; Table S3C
65	0.1	during TTX	right	2Hz + harmonics	fellow	21.0333	2.13474	Figs. 4G, S3C; Table S3C
67	0.1	during TTX	right	2Hz + harmonics	fellow	18.6436	1.23596	Figs. 4G S3C; Table S3C
69	0.1	post-TTX	right	2Hz + harmonics	fellow	50.0714	3.23488	Figs. 4G, S3C; Table S3C
79	0.1	post-TTX	right	2Hz + harmonics	fellow	77.7892	7.67146	Figs. 4G, S3C; Table S3C
85	0.1	post-TTX	right	2Hz + harmonics	fellow	48.0894	4.46124	Figs. 4G, S3C; Table S3C
101	0.1	post-TTX	right	2Hz + harmonics	fellow	75.1289	8.08233	Figs. 4G, S3C; Table S3C
30	0.1	pre-MD	right	control frequencies	fellow	4.38246	0.274832	Table S3C
51	0.1	post-MD / pre-TTX	right	control frequencies	fellow	15.4026	1.27683	Table S3C
59	0.1	post-MD / pre-TTX	right	control frequencies	fellow	12.1851	1.41775	Table S3C
61	0.1	during TTX	right	control frequencies	fellow	13.7657	1.13192	Table S3C
63	0.1	during TTX	right	control frequencies	fellow	16.8111	1.58693	Table S3C
65	0.1	during TTX	right	control frequencies	fellow	16.1684	1.37958	Table S3C
67	0.1	during TTX	right	control frequencies	fellow	14.0294	1.20584	Table S3C
69	0.1	post-TTX	right	control frequencies	fellow	14.7425	1.3956	Table S3C
79	0.1	post-TTX	right	control frequencies	fellow	13.3775	0.827218	Table S3C
85	0.1	post-TTX	right	control frequencies	fellow	14.9145	1.15013	Table S3C
101	0.1	post-TTX	right	control frequencies	fellow	15.873	1.00787	Table S3C
30	0.5	pre-MD	right	2Hz + harmonics	deprived	5.7585	0.338916	Table S3C
51	0.5	post-MD / pre-TTX	right	2Hz + harmonics	deprived	11.4183	0.812745	Table S3C
59	0.5	post-MD / pre-TTX	right	2Hz + harmonics	deprived	20.5885	2.13127	Table S3C
61	0.5	during TTX	right	2Hz + harmonics	deprived	30.0762	2.1764	Table S3C
63	0.5	during TTX	right	2Hz + harmonics	deprived	39.7023	2.8278	Table S3C
65	0.5	during TTX	right	2Hz + harmonics	deprived	35.6775	3.24099	Table S3C
67	0.5	during TTX	right	2Hz + harmonics	deprived	33.8709	3.15899	Fig. 4C; Table S3C
69	0.5	post-TTX	right	2Hz + harmonics	deprived	28.0705	3.1286	Table S3C
79	0.5	post-TTX	right	2Hz + harmonics	deprived	43.1034	3.04524	Table S3C
85	0.5	post-TTX	right	2Hz + harmonics	deprived	32.4165	2.76588	Table S3C
101	0.5	post-TTX	right	2Hz + harmonics	deprived	68.6583	6.84526	Table S3C
30	0.5	pre-MD	right	control frequencies	deprived	4.20453	0.297209	Table S3C
51	0.5	post-MD / pre-TTX	right	control frequencies	deprived	11.8105	0.818792	Table S3C
59	0.5	post-MD / pre-TTX	right	control frequencies	deprived	13.773	0.254874	Table S3C
61	0.5	during TTX	right	control frequencies	deprived	15.009	0.99964	Table S3C
63	0.5	during TTX	right	control frequencies	deprived	15.3757	1.54629	Table S3C
65	0.5	during TTX	right	control frequencies	deprived	12.9021	0.831372	Table S3C
67	0.5	during TTX	right	control frequencies	deprived	15.2057	0.891999	Fig. 4C; Table S3C
69	0.5	post-TTX	right	control frequencies	deprived	15.5259	0.8818	Table S3C
79	0.5	post-TTX	right	control frequencies	deprived	17.704	1.10609	Table S3C
85	0.5	post-TTX	right	control frequencies	deprived	14.7562	1.46248	Table S3C
101	0.5	post-TTX	right	control frequencies	deprived	15.0537	1.15593	Table S3C
30	0.5	pre-MD	right	2Hz + harmonics	fellow	5.4563	0.319304	Table S3C
51	0.5	post-MD / pre-TTX	right	2Hz + harmonics	fellow	64.6561	4.16707	Table S3C
59	0.5	post-MD / pre-TTX	right	2Hz + harmonics	fellow	68.2741	4.31165	Table S3C
61	0.5	during TTX	right	2Hz + harmonics	fellow	13.492	1.98267	Table S3C
63	0.5	during TTX	right	2Hz + harmonics	fellow	16.6156	0.801375	Table S3C
65	0.5	during TTX	right	2Hz + harmonics	fellow	15.6429	0.902651	Table S3C
67	0.5	during TTX	right	2Hz + harmonics	fellow	15.1623	0.752327	Table S3C
69	0.5	post-TTX	right	2Hz + harmonics	fellow	28.1428	1.38133	Table S3C
79	0.5	post-TTX	right	2Hz + harmonics	fellow	32.2588	5.80702	Table S3C
85	0.5	post-TTX	right	2Hz + harmonics	fellow	39.5876	4.45567	Table S3C
101	0.5	post-TTX	right	2Hz + harmonics	fellow	66.5015	7.39238	Table S3C
30	0.5	pre-MD	right	control frequencies	fellow	3.88859	0.243657	Table S3C
51	0.5	post-MD / pre-TTX	right	control frequencies	fellow	12.4789	0.931978	Table S3C
59	0.5	post-MD / pre-TTX	right	control frequencies	fellow	15.3121	1.13571	Table S3C
61	0.5	during TTX	right	control frequencies	fellow	14.1138	1.65703	Table S3C
63	0.5	during TTX	right	control frequencies	fellow	16.9749	0.585309	Table S3C
65	0.5	during TTX	right	control frequencies	fellow	15.6899	0.850174	Table S3C
67	0.5	during TTX	right	control frequencies	fellow	15.4538	1.27692	Table S3C
69	0.5	post-TTX	right	control frequencies	fellow	13.9562	1.02722	Table S3C
79	0.5	post-TTX	right	control frequencies	fellow	14.5043	0.770922	Table S3C
85	0.5	post-TTX	right	control frequencies	fellow	15.4418	1.1127	Table S3C
101	0.5	post-TTX	right	control frequencies	fellow	16.3091	1.0214	Table S3C
67	1	during TTX	right	2Hz + harmonics	deprived	18.7228	0.985501	Fig. 4C; Table S3C
67	1	during TTX	right	control frequencies	deprived	13.8884	1.53931	Fig. 4C; Table S3C
67	2	during TTX	right	2Hz + harmonics	deprived	14.9062	1.25732	Fig. 4C; Table S3C
67	2	during TTX	right	control frequencies	deprived	16.4481	0.573272	Fig. 4C; Table S3C
30	grey	pre-MD	right	2Hz + harmonics	deprived	3.98794	0.310096	Table S3C
51	grey	post-MD / pre-TTX	right	2Hz + harmonics	deprived	13.4952	0.478577	Table S3C
59	grey	post-MD / pre-TTX	right	2Hz + harmonics	deprived	13.9541	0.76655	Table S3C
61	grey	during TTX	right	2Hz + harmonics	deprived	16.0941	1.34442	Table S3C
63	grey	during TTX	right	2Hz + harmonics	deprived	13.3434	0.797309	Table S3C
65	grey	during TTX	right	2Hz + harmonics	deprived	14.7335	0.89143	Table S3C
67	grey	during TTX	right	2Hz + harmonics	deprived	17.9999	1.04645	Fig. 4C; Table S3C
69	grey	post-TTX	right	2Hz + harmonics	deprived	15.6305	0.984019	Table S3C
79	grey	post-TTX	right	2Hz + harmonics	deprived	20.2534	0.974117	Table S3C
85	grey	post-TTX	right	2Hz + harmonics	deprived	15.7376	1.90068	Table S3C
101	grey	post-TTX	right	2Hz + harmonics	deprived	16.6438	1.36021	Table S3C
30	grey	pre-MD	right	control frequencies	deprived	4.14995	0.357658	Table S3C
51	grey	post-MD / pre-TTX	right	control frequencies	deprived	11.5764	0.748929	Table S3C
59	grey	post-MD / pre-TTX	right	control frequencies	deprived	12.3277	0.690727	Table S3C
61	grey	during TTX	right	control frequencies	deprived	14.4988	0.704531	Table S3C
63	grey	during TTX	right	control frequencies	deprived	17.1152	1.2727	Table S3C
65	grey	during TTX	right	control frequencies	deprived	15.3983	1.71801	Table S3C
67	grey	during TTX	right	control frequencies	deprived	19.9056	0.714219	Fig. 4C; Table S3C
69	grey	post-TTX	right	control frequencies	deprived	13.5797	0.869762	Table S3C
79	grey	post-TTX	right	control frequencies	deprived	19.2447	1.34487	Table S3C
85	grey	post-TTX	right	control frequencies	deprived	14.7358	2.34612	Table S3C
101	grey	post-TTX	right	control frequencies	deprived	17.4071	0.980696	Table S3C
30	grey	pre-MD	right	2Hz + harmonics	fellow	4.58919	0.35643	Table S3C
51	grey	post-MD / pre-TTX	right	2Hz + harmonics	fellow	13.5423	1.00948	Table S3C
59	grey	post-MD / pre-TTX	right	2Hz + harmonics	fellow	15.7088	1.05854	Table S3C
61	grey	during TTX	right	2Hz + harmonics	fellow	12.7961	1.93864	Table S3C
63	grey	during TTX	right	2Hz + harmonics	fellow	15.6073	0.969894	Table S3C
65	grey	during TTX	right	2Hz + harmonics	fellow	17.1018	1.23837	Table S3C
67	grey	during TTX	right	2Hz + harmonics	fellow	15.0723	1.52372	Table S3C
69	grey	post-TTX	right	2Hz + harmonics	fellow	16.2398	0.910897	Table S3C
79	grey	post-TTX	right	2Hz + harmonics	fellow	14.2209	0.94274	Table S3C
85	grey	post-TTX	right	2Hz + harmonics	fellow	19.0028	2.60097	Table S3C
101	grey	post-TTX	right	2Hz + harmonics	fellow	14.9887	0.614167	Table S3C
30	grey	pre-MD	right	control frequencies	fellow	4.1927	0.149489	Table S3C
51	grey	post-MD / pre-TTX	right	control frequencies	fellow	15.5588	1.03008	Table S3C
59	grey	post-MD / pre-TTX	right	control frequencies	fellow	14.2639	0.94116	Table S3C
61	grey	during TTX	right	control frequencies	fellow	14.8493	2.03123	Table S3C
63	grey	during TTX	right	control frequencies	fellow	19.0462	1.68498	Table S3C
65	grey	during TTX	right	control frequencies	fellow	16.884	1.3742	Table S3C
67	grey	during TTX	right	control frequencies	fellow	14.8641	1.26174	Table S3C
69	grey	post-TTX	right	control frequencies	fellow	16.6984	1.0251	Table S3C
79	grey	post-TTX	right	control frequencies	fellow	14.7164	1.13976	Table S3C
85	grey	post-TTX	right	control frequencies	fellow	17.557	1.76389	Table S3C
101	grey	post-TTX	right	control frequencies	fellow	16.34	0.664281	Table S3C
30	0.05	pre-MD	left	2Hz + harmonics	deprived	13.1171	0.703721	Table S3C
51	0.05	post-MD / pre-TTX	left	2Hz + harmonics	deprived	17.2636	1.49422	Table S3C
59	0.05	post-MD / pre-TTX	left	2Hz + harmonics	deprived	30.9355	0.631051	Table S3C
61	0.05	during TTX	left	2Hz + harmonics	deprived	78.3161	2.09351	Table S3C
63	0.05	during TTX	left	2Hz + harmonics	deprived	81.0662	2.36104	Table S3C
65	0.05	during TTX	left	2Hz + harmonics	deprived	81.162	2.21431	Table S3C
67	0.05	during TTX	left	2Hz + harmonics	deprived	119.883	4.69424	Table S3C
69	0.05	post-TTX	left	2Hz + harmonics	deprived	58.3996	1.92942	Table S3C
79	0.05	post-TTX	left	2Hz + harmonics	deprived	63.7753	2.24045	Table S3C
85	0.05	post-TTX	left	2Hz + harmonics	deprived	44.3628	1.91638	Table S3C
101	0.05	post-TTX	left	2Hz + harmonics	deprived	64.6939	2.17656	Table S3C
30	0.05	pre-MD	left	control frequencies	deprived	4.44428	0.361776	Table S3C
51	0.05	post-MD / pre-TTX	left	control frequencies	deprived	12.0864	0.729012	Table S3C
59	0.05	post-MD / pre-TTX	left	control frequencies	deprived	13.9005	0.823932	Table S3C
61	0.05	during TTX	left	control frequencies	deprived	15.8443	0.675699	Table S3C
63	0.05	during TTX	left	control frequencies	deprived	16.9364	1.0205	Table S3C
65	0.05	during TTX	left	control frequencies	deprived	14.2564	0.846387	Table S3C
67	0.05	during TTX	left	control frequencies	deprived	15.9335	1.30359	Table S3C
69	0.05	post-TTX	left	control frequencies	deprived	15.6858	1.08299	Table S3C
79	0.05	post-TTX	left	control frequencies	deprived	16.6671	1.15658	Table S3C
85	0.05	post-TTX	left	control frequencies	deprived	11.0595	1.42617	Table S3C
101	0.05	post-TTX	left	control frequencies	deprived	16.7697	1.02506	Table S3C
30	0.05	pre-MD	left	2Hz + harmonics	fellow	15.1032	0.848739	Table S3C
51	0.05	post-MD / pre-TTX	left	2Hz + harmonics	fellow	123.214	6.06253	Table S3C
59	0.05	post-MD / pre-TTX	left	2Hz + harmonics	fellow	109.723	4.16066	Table S3C
61	0.05	during TTX	left	2Hz + harmonics	fellow	16.196	0.932961	Table S3C
63	0.05	during TTX	left	2Hz + harmonics	fellow	17.2577	1.4665	Table S3C
65	0.05	during TTX	left	2Hz + harmonics	fellow	23.45	2.96569	Table S3C
67	0.05	during TTX	left	2Hz + harmonics	fellow	18.907	1.83435	Table S3C
69	0.05	post-TTX	left	2Hz + harmonics	fellow	50.0399	2.09267	Table S3C
79	0.05	post-TTX	left	2Hz + harmonics	fellow	70.3309	7.3697	Table S3C
85	0.05	post-TTX	left	2Hz + harmonics	fellow	42.1014	4.27415	Table S3C
101	0.05	post-TTX	left	2Hz + harmonics	fellow	63.4094	5.76818	Table S3C
30	0.05	pre-MD	left	control frequencies	fellow	4.79033	0.418031	Table S3C
51	0.05	post-MD / pre-TTX	left	control frequencies	fellow	13.811	0.892479	Table S3C
59	0.05	post-MD / pre-TTX	left	control frequencies	fellow	12.5526	0.52138	Table S3C
61	0.05	during TTX	left	control frequencies	fellow	14.2267	0.970306	Table S3C
63	0.05	during TTX	left	control frequencies	fellow	16.5167	1.04161	Table S3C
65	0.05	during TTX	left	control frequencies	fellow	17.127	1.24265	Table S3C
67	0.05	during TTX	left	control frequencies	fellow	15.3813	0.776172	Table S3C
69	0.05	post-TTX	left	control frequencies	fellow	13.5058	0.890899	Table S3C
79	0.05	post-TTX	left	control frequencies	fellow	15.5049	0.754175	Table S3C
85	0.05	post-TTX	left	control frequencies	fellow	15.1462	1.1723	Table S3C
101	0.05	post-TTX	left	control frequencies	fellow	15.7362	0.591958	Table S3C
30	0.1	pre-MD	left	2Hz + harmonics	deprived	9.67152	0.654416	Figs. 4G, S3C; Table S3C
51	0.1	post-MD / pre-TTX	left	2Hz + harmonics	deprived	16.5375	0.869835	Figs. 4G, S3C; Table S3C
59	0.1	post-MD / pre-TTX	left	2Hz + harmonics	deprived	31.2024	2.55076	Figs. 4G, S3C; Table S3C
61	0.1	during TTX	left	2Hz + harmonics	deprived	58.854	4.15046	Figs. 4G, S3C; Table S3C
63	0.1	during TTX	left	2Hz + harmonics	deprived	69.571	3.25751	Figs. 4G, S3C; Table S3C
65	0.1	during TTX	left	2Hz + harmonics	deprived	67.8947	6.47562	Figs. 4G, S3C; Table S3C
67	0.1	during TTX	left	2Hz + harmonics	deprived	96.4255	5.3009	Figs. 4G, S3C; Table S3C
69	0.1	post-TTX	left	2Hz + harmonics	deprived	53.1609	3.54559	Figs. 4G, S3C; Table S3C
79	0.1	post-TTX	left	2Hz + harmonics	deprived	62.2138	5.245	Figs. 4G, S3C; Table S3C
85	0.1	post-TTX	left	2Hz + harmonics	deprived	43.0548	1.8034	Figs. 4G, S3C; Table S3C
101	0.1	post-TTX	left	2Hz + harmonics	deprived	68.0136	8.79429	Figs. 4G, S3C; Table S3C
30	0.1	pre-MD	left	control frequencies	deprived	4.69569	0.257676	Table S3C
51	0.1	post-MD / pre-TTX	left	control frequencies	deprived	13.5752	0.663869	Table S3C
59	0.1	post-MD / pre-TTX	left	control frequencies	deprived	14.3522	1.1046	Table S3C
61	0.1	during TTX	left	control frequencies	deprived	15.9039	1.08102	Table S3C
63	0.1	during TTX	left	control frequencies	deprived	17.4133	1.20978	Table S3C
65	0.1	during TTX	left	control frequencies	deprived	15.6709	0.93957	Table S3C
67	0.1	during TTX	left	control frequencies	deprived	14.4587	0.54155	Table S3C
69	0.1	post-TTX	left	control frequencies	deprived	14.4455	0.668904	Table S3C
79	0.1	post-TTX	left	control frequencies	deprived	19.4089	1.33454	Table S3C
85	0.1	post-TTX	left	control frequencies	deprived	14.6016	2.24002	Table S3C
101	0.1	post-TTX	left	control frequencies	deprived	16.3003	1.16291	Table S3C
30	0.1	pre-MD	left	2Hz + harmonics	fellow	12.925	0.939292	Figs. 4G, S3C; Table S3C
51	0.1	post-MD / pre-TTX	left	2Hz + harmonics	fellow	112.422	5.05298	Figs. 4G, S3C; Table S3C
59	0.1	post-MD / pre-TTX	left	2Hz + harmonics	fellow	117.801	5.36835	Figs. 4G, S3C; Table S3C
61	0.1	during TTX	left	2Hz + harmonics	fellow	15.5745	1.53873	Figs. 4G, S3C; Table S3C
63	0.1	during TTX	left	2Hz + harmonics	fellow	17.0752	0.937808	Figs. 4G, S3C; Table S3C
65	0.1	during TTX	left	2Hz + harmonics	fellow	19.9591	2.13919	Figs. 4G, S3C; Table S3C
67	0.1	during TTX	left	2Hz + harmonics	fellow	19.1787	1.58027	Figs. 4G, S3C; Table S3C
69	0.1	post-TTX	left	2Hz + harmonics	fellow	50.2109	3.28977	Figs. 4G, S3C; Table S3C
79	0.1	post-TTX	left	2Hz + harmonics	fellow	75.481	6.55234	Figs. 4G, S3C; Table S3C
85	0.1	post-TTX	left	2Hz + harmonics	fellow	46.1601	4.15071	Figs. 4G, S3C; Table S3C
101	0.1	post-TTX	left	2Hz + harmonics	fellow	68.9793	7.66697	Figs. 4G, S3C; Table S3C
30	0.1	pre-MD	left	control frequencies	fellow	4.42172	0.250257	Table S3C
51	0.1	post-MD / pre-TTX	left	control frequencies	fellow	16.3653	1.14408	Table S3C
59	0.1	post-MD / pre-TTX	left	control frequencies	fellow	12.5112	1.3385	Table S3C
61	0.1	during TTX	left	control frequencies	fellow	14.0825	1.10309	Table S3C
63	0.1	during TTX	left	control frequencies	fellow	16.939	1.36786	Table S3C
65	0.1	during TTX	left	control frequencies	fellow	16.0287	1.34489	Table S3C
67	0.1	during TTX	left	control frequencies	fellow	15.0515	1.15716	Table S3C
69	0.1	post-TTX	left	control frequencies	fellow	14.3189	1.29313	Table S3C
79	0.1	post-TTX	left	control frequencies	fellow	12.359	1.01946	Table S3C
85	0.1	post-TTX	left	control frequencies	fellow	14.9603	1.20043	Table S3C
101	0.1	post-TTX	left	control frequencies	fellow	15.5071	1.16433	Table S3C
30	0.5	pre-MD	left	2Hz + harmonics	deprived	7.02204	0.458807	Table S3C
51	0.5	post-MD / pre-TTX	left	2Hz + harmonics	deprived	12.4072	0.901551	Table S3C
59	0.5	post-MD / pre-TTX	left	2Hz + harmonics	deprived	22.6603	2.8161	Table S3C
61	0.5	during TTX	left	2Hz + harmonics	deprived	35.1359	2.54762	Table S3C
63	0.5	during TTX	left	2Hz + harmonics	deprived	37.1031	2.96946	Table S3C
65	0.5	during TTX	left	2Hz + harmonics	deprived	36.4033	3.29903	Table S3C
67	0.5	during TTX	left	2Hz + harmonics	deprived	36.6991	3.43199	Table S3C
69	0.5	post-TTX	left	2Hz + harmonics	deprived	26.5959	2.94354	Table S3C
79	0.5	post-TTX	left	2Hz + harmonics	deprived	38.7043	2.70229	Table S3C
85	0.5	post-TTX	left	2Hz + harmonics	deprived	31.6014	2.79306	Table S3C
101	0.5	post-TTX	left	2Hz + harmonics	deprived	61.812	6.86254	Table S3C
30	0.5	pre-MD	left	control frequencies	deprived	4.41526	0.353492	Table S3C
51	0.5	post-MD / pre-TTX	left	control frequencies	deprived	12.5828	0.710056	Table S3C
59	0.5	post-MD / pre-TTX	left	control frequencies	deprived	14.0357	0.447275	Table S3C
61	0.5	during TTX	left	control frequencies	deprived	16.4591	1.10601	Table S3C
63	0.5	during TTX	left	control frequencies	deprived	14.696	1.65336	Table S3C
65	0.5	during TTX	left	control frequencies	deprived	13.1572	0.867924	Table S3C
67	0.5	during TTX	left	control frequencies	deprived	15.5046	0.819986	Table S3C
69	0.5	post-TTX	left	control frequencies	deprived	15.36	0.898253	Table S3C
79	0.5	post-TTX	left	control frequencies	deprived	17.2071	0.706576	Table S3C
85	0.5	post-TTX	left	control frequencies	deprived	14.996	1.588	Table S3C
101	0.5	post-TTX	left	control frequencies	deprived	14.4663	1.2127	Table S3C
30	0.5	pre-MD	left	2Hz + harmonics	fellow	5.89631	0.423462	Table S3C
51	0.5	post-MD / pre-TTX	left	2Hz + harmonics	fellow	70.082	4.17239	Table S3C
59	0.5	post-MD / pre-TTX	left	2Hz + harmonics	fellow	72.6346	4.78488	Table S3C
61	0.5	during TTX	left	2Hz + harmonics	fellow	13.7823	1.89993	Table S3C
63	0.5	during TTX	left	2Hz + harmonics	fellow	15.8716	0.845216	Table S3C
65	0.5	during TTX	left	2Hz + harmonics	fellow	15.1333	0.892561	Table S3C
67	0.5	during TTX	left	2Hz + harmonics	fellow	16.1358	0.665372	Table S3C
69	0.5	post-TTX	left	2Hz + harmonics	fellow	27.2079	1.41868	Table S3C
79	0.5	post-TTX	left	2Hz + harmonics	fellow	30.8423	5.3242	Table S3C
85	0.5	post-TTX	left	2Hz + harmonics	fellow	38.2939	4.32861	Table S3C
101	0.5	post-TTX	left	2Hz + harmonics	fellow	59.8021	7.03641	Table S3C
30	0.5	pre-MD	left	control frequencies	fellow	3.92713	0.223168	Table S3C
51	0.5	post-MD / pre-TTX	left	control frequencies	fellow	13.093	1.12405	Table S3C
59	0.5	post-MD / pre-TTX	left	control frequencies	fellow	15.7373	1.21142	Table S3C
61	0.5	during TTX	left	control frequencies	fellow	14.107	1.71988	Table S3C
63	0.5	during TTX	left	control frequencies	fellow	16.3101	0.578745	Table S3C
65	0.5	during TTX	left	control frequencies	fellow	15.6596	0.806634	Table S3C
67	0.5	during TTX	left	control frequencies	fellow	16.6346	1.70815	Table S3C
69	0.5	post-TTX	left	control frequencies	fellow	14.0508	0.973216	Table S3C
79	0.5	post-TTX	left	control frequencies	fellow	14.778	0.806901	Table S3C
85	0.5	post-TTX	left	control frequencies	fellow	15.6436	1.14143	Table S3C
101	0.5	post-TTX	left	control frequencies	fellow	15.8442	0.853973	Table S3C
30	grey	pre-MD	left	2Hz + harmonics	deprived	4.17809	0.287594	Table S3C
51	grey	post-MD / pre-TTX	left	2Hz + harmonics	deprived	13.6557	0.424195	Table S3C
59	grey	post-MD / pre-TTX	left	2Hz + harmonics	deprived	14.3269	0.900693	Table S3C
61	grey	during TTX	left	2Hz + harmonics	deprived	17.1324	1.37964	Table S3C
63	grey	during TTX	left	2Hz + harmonics	deprived	13.3746	0.739418	Table S3C
65	grey	during TTX	left	2Hz + harmonics	deprived	15.0704	0.906257	Table S3C
67	grey	during TTX	left	2Hz + harmonics	deprived	19.3145	1.18532	Table S3C
69	grey	post-TTX	left	2Hz + harmonics	deprived	15.8107	1.00872	Table S3C
79	grey	post-TTX	left	2Hz + harmonics	deprived	20.1772	1.01197	Table S3C
85	grey	post-TTX	left	2Hz + harmonics	deprived	16.4949	1.97411	Table S3C
101	grey	post-TTX	left	2Hz + harmonics	deprived	16.2318	1.34912	Table S3C
30	grey	pre-MD	left	control frequencies	deprived	4.34355	0.349484	Table S3C
51	grey	post-MD / pre-TTX	left	control frequencies	deprived	11.7829	0.854126	Table S3C
59	grey	post-MD / pre-TTX	left	control frequencies	deprived	12.86	0.574662	Table S3C
61	grey	during TTX	left	control frequencies	deprived	15.429	0.745125	Table S3C
63	grey	during TTX	left	control frequencies	deprived	16.2707	1.29722	Table S3C
65	grey	during TTX	left	control frequencies	deprived	15.5277	1.78517	Table S3C
67	grey	during TTX	left	control frequencies	deprived	20.7703	0.816976	Table S3C
69	grey	post-TTX	left	control frequencies	deprived	14.0378	0.908016	Table S3C
79	grey	post-TTX	left	control frequencies	deprived	19.0038	1.26836	Table S3C
85	grey	post-TTX	left	control frequencies	deprived	15.1377	2.29771	Table S3C
101	grey	post-TTX	left	control frequencies	deprived	16.1913	1.00507	Table S3C
30	grey	pre-MD	left	2Hz + harmonics	fellow	4.78143	0.356209	Table S3C
51	grey	post-MD / pre-TTX	left	2Hz + harmonics	fellow	14.2762	1.08396	Table S3C
59	grey	post-MD / pre-TTX	left	2Hz + harmonics	fellow	16.4295	1.19068	Table S3C
61	grey	during TTX	left	2Hz + harmonics	fellow	13.0615	1.92465	Table S3C
63	grey	during TTX	left	2Hz + harmonics	fellow	16.272	0.970736	Table S3C
65	grey	during TTX	left	2Hz + harmonics	fellow	16.5387	1.46469	Table S3C
67	grey	during TTX	left	2Hz + harmonics	fellow	15.7137	1.41636	Table S3C
69	grey	post-TTX	left	2Hz + harmonics	fellow	16.6255	1.10357	Table S3C
79	grey	post-TTX	left	2Hz + harmonics	fellow	13.9331	0.986852	Table S3C
85	grey	post-TTX	left	2Hz + harmonics	fellow	19.3767	2.59916	Table S3C
101	grey	post-TTX	left	2Hz + harmonics	fellow	14.559	0.68873	Table S3C
30	grey	pre-MD	left	control frequencies	fellow	4.31383	0.175607	Table S3C
51	grey	post-MD / pre-TTX	left	control frequencies	fellow	16.2767	0.999838	Table S3C
59	grey	post-MD / pre-TTX	left	control frequencies	fellow	14.7096	0.981366	Table S3C
61	grey	during TTX	left	control frequencies	fellow	15.0902	2.00691	Table S3C
63	grey	during TTX	left	control frequencies	fellow	18.5703	1.50576	Table S3C
65	grey	during TTX	left	control frequencies	fellow	16.1782	1.35346	Table S3C
67	grey	during TTX	left	control frequencies	fellow	16.7496	0.959403	Table S3C
69	grey	post-TTX	left	control frequencies	fellow	16.6844	0.959496	Table S3C
79	grey	post-TTX	left	control frequencies	fellow	13.9382	1.18211	Table S3C
85	grey	post-TTX	left	control frequencies	fellow	17.9466	1.69079	Table S3C
101	grey	post-TTX	left	control frequencies	fellow	15.6134	0.68831	Table S3C

## Sheet: C479
Postnatal Age (days)	Spatial Frequency (cpd)	Condition	Hemisphere	Analysis frequency	Eye	Mean Power (uV)	SD Power (uV)	Associated figure/table
30	0.05	pre-MD	right	2Hz + harmonics	deprived	37.6848	1.33393	Table S3D
51	0.05	post-MD / pre-TTX	right	2Hz + harmonics	deprived	28.6923	2.5676	Table S3D
59	0.05	post-MD / pre-TTX	right	2Hz + harmonics	deprived	52.3599	1.66659	Table S3D
61	0.05	during TTX	right	2Hz + harmonics	deprived	80.2484	3.14591	Table S3D
64	0.05	between TTX	right	2Hz + harmonics	deprived	54.2789	3.36741	Table S3D
67	0.05	between TTX	right	2Hz + harmonics	deprived	61.1991	1.6804	Table S3D
69	0.05	during TTX	right	2Hz + harmonics	deprived	65.4856	2.431	Table S3D
71	0.05	during TTX	right	2Hz + harmonics	deprived	63.0854	2.10251	Table S3D
73	0.05	during TTX	right	2Hz + harmonics	deprived	90.3291	3.22798	Table S3D
75	0.05	during TTX	right	2Hz + harmonics	deprived	73.6838	1.52112	Table S3D
82	0.05	post-TTX	right	2Hz + harmonics	deprived	63.2426	2.3887	Table S3D
123	0.05	post-TTX	right	2Hz + harmonics	deprived	20.0026	1.18726	Table S3D
30	0.05	pre-MD	right	control frequencies	deprived	7.51504	0.405902	Table S3D
51	0.05	post-MD / pre-TTX	right	control frequencies	deprived	13.0608	0.931693	Table S3D
59	0.05	post-MD / pre-TTX	right	control frequencies	deprived	15.5049	1.74545	Table S3D
61	0.05	during TTX	right	control frequencies	deprived	15.2496	0.941901	Table S3D
64	0.05	between TTX	right	control frequencies	deprived	15.1911	1.22728	Table S3D
67	0.05	between TTX	right	control frequencies	deprived	13.2856	1.18775	Table S3D
69	0.05	during TTX	right	control frequencies	deprived	13.3723	1.00872	Table S3D
71	0.05	during TTX	right	control frequencies	deprived	11.9293	1.04161	Table S3D
73	0.05	during TTX	right	control frequencies	deprived	12.6145	0.848174	Table S3D
75	0.05	during TTX	right	control frequencies	deprived	14.0646	0.583794	Table S3D
82	0.05	post-TTX	right	control frequencies	deprived	14.0125	1.32401	Table S3D
123	0.05	post-TTX	right	control frequencies	deprived	10.7258	0.803799	Table S3D
30	0.05	pre-MD	right	2Hz + harmonics	fellow	38.0168	1.2405	Table S3D
51	0.05	post-MD / pre-TTX	right	2Hz + harmonics	fellow	82.2581	2.55413	Table S3D
59	0.05	post-MD / pre-TTX	right	2Hz + harmonics	fellow	94.2457	1.53344	Table S3D
61	0.05	during TTX	right	2Hz + harmonics	fellow	15.1041	1.10612	Table S3D
64	0.05	between TTX	right	2Hz + harmonics	fellow	80.1473	2.46454	Table S3D
67	0.05	between TTX	right	2Hz + harmonics	fellow	85.591	3.00552	Table S3D
69	0.05	during TTX	right	2Hz + harmonics	fellow	15.9156	1.07322	Table S3D
71	0.05	during TTX	right	2Hz + harmonics	fellow	16.1043	1.29812	Table S3D
73	0.05	during TTX	right	2Hz + harmonics	fellow	15.9577	1.60858	Table S3D
75	0.05	during TTX	right	2Hz + harmonics	fellow	16.1681	2.51664	Table S3D
82	0.05	post-TTX	right	2Hz + harmonics	fellow	66.1439	2.90164	Table S3D
123	0.05	post-TTX	right	2Hz + harmonics	fellow	18.7451	0.918023	Table S3D
30	0.05	pre-MD	right	control frequencies	fellow	7.03731	0.713598	Table S3D
51	0.05	post-MD / pre-TTX	right	control frequencies	fellow	12.5815	0.621197	Table S3D
59	0.05	post-MD / pre-TTX	right	control frequencies	fellow	14.4003	0.953303	Table S3D
61	0.05	during TTX	right	control frequencies	fellow	15.7815	0.85214	Table S3D
64	0.05	between TTX	right	control frequencies	fellow	12.8631	1.4588	Table S3D
67	0.05	between TTX	right	control frequencies	fellow	12.3046	0.759881	Table S3D
69	0.05	during TTX	right	control frequencies	fellow	14.772	0.834697	Table S3D
71	0.05	during TTX	right	control frequencies	fellow	12.3544	0.727628	Table S3D
73	0.05	during TTX	right	control frequencies	fellow	15.7594	1.03971	Table S3D
75	0.05	during TTX	right	control frequencies	fellow	12.5009	1.62359	Table S3D
82	0.05	post-TTX	right	control frequencies	fellow	11.8945	0.636028	Table S3D
123	0.05	post-TTX	right	control frequencies	fellow	9.72625	0.9083	Table S3D
30	0.1	pre-MD	right	2Hz + harmonics	deprived	39.0759	2.05076	Figs. 4G, S3D; Table S3D
51	0.1	post-MD / pre-TTX	right	2Hz + harmonics	deprived	22.8722	2.60448	Figs. 4G, S3D; Table S3D
59	0.1	post-MD / pre-TTX	right	2Hz + harmonics	deprived	46.2493	1.94741	Figs. 4G, S3D; Table S3D
61	0.1	during TTX	right	2Hz + harmonics	deprived	83.4979	3.28098	Figs. 4G, S3D; Table S3D
64	0.1	between TTX	right	2Hz + harmonics	deprived	56.2681	2.73523	Figs. 4G, S3D; Table S3D
67	0.1	between TTX	right	2Hz + harmonics	deprived	59.8208	1.916	Figs. 4G, S3D; Table S3D
69	0.1	during TTX	right	2Hz + harmonics	deprived	65.2432	2.46464	Figs. 4G, S3D; Table S3D
71	0.1	during TTX	right	2Hz + harmonics	deprived	63.2605	4.02665	Figs. 4G, S3D; Table S3D
73	0.1	during TTX	right	2Hz + harmonics	deprived	76.5258	3.91054	Figs. 4G, S3D; Table S3D
75	0.1	during TTX	right	2Hz + harmonics	deprived	75.4849	3.93648	Figs. 4G, S3D; Table S3D
82	0.1	post-TTX	right	2Hz + harmonics	deprived	55.0636	2.86177	Figs. 4G, S3D; Table S3D
123	0.1	post-TTX	right	2Hz + harmonics	deprived	19.689	1.99757	Figs. 4G, S3D; Table S3D
30	0.1	pre-MD	right	control frequencies	deprived	7.2775	0.406805	Figs. 4G, S3D; Table S3D
51	0.1	post-MD / pre-TTX	right	control frequencies	deprived	11.5852	0.579664	Figs. 4G, S3D; Table S3D
59	0.1	post-MD / pre-TTX	right	control frequencies	deprived	14.23	0.780365	Figs. 4G, S3D; Table S3D
61	0.1	during TTX	right	control frequencies	deprived	14.2317	1.22089	Figs. 4G, S3D; Table S3D
64	0.1	between TTX	right	control frequencies	deprived	15.0256	0.94804	Figs. 4G, S3D; Table S3D
67	0.1	between TTX	right	control frequencies	deprived	13.3692	1.10032	Figs. 4G, S3D; Table S3D
69	0.1	during TTX	right	control frequencies	deprived	13.1941	0.657959	Figs. 4G, S3D; Table S3D
71	0.1	during TTX	right	control frequencies	deprived	15.0606	1.19997	Figs. 4G, S3D; Table S3D
73	0.1	during TTX	right	control frequencies	deprived	13.643	0.79286	Figs. 4G, S3D; Table S3D
75	0.1	during TTX	right	control frequencies	deprived	15.0477	0.875766	Figs. 4G, S3D; Table S3D
82	0.1	post-TTX	right	control frequencies	deprived	11.2305	0.596483	Figs. 4G, S3D; Table S3D
123	0.1	post-TTX	right	control frequencies	deprived	10.96	0.681052	Figs. 4G, S3D; Table S3D
30	0.1	pre-MD	right	2Hz + harmonics	fellow	31.7558	1.09095	Figs. 4G, S3D; Table S3D
51	0.1	post-MD / pre-TTX	right	2Hz + harmonics	fellow	78.1293	2.80141	Figs. 4G, S3D; Table S3D
59	0.1	post-MD / pre-TTX	right	2Hz + harmonics	fellow	80.2822	5.34188	Figs. 4G, S3D; Table S3D
61	0.1	during TTX	right	2Hz + harmonics	fellow	15.3908	0.941677	Figs. 4G, S3D; Table S3D
64	0.1	between TTX	right	2Hz + harmonics	fellow	75.0784	4.61676	Figs. 4G, S3D; Table S3D
67	0.1	between TTX	right	2Hz + harmonics	fellow	75.975	2.79224	Figs. 4G, S3D; Table S3D
69	0.1	during TTX	right	2Hz + harmonics	fellow	16.1273	1.02136	Figs. 4G, S3D; Table S3D
71	0.1	during TTX	right	2Hz + harmonics	fellow	14.5074	1.18585	Figs. 4G, S3D; Table S3D
73	0.1	during TTX	right	2Hz + harmonics	fellow	15.3221	1.87358	Figs. 4G, S3D; Table S3D
75	0.1	during TTX	right	2Hz + harmonics	fellow	14.301	1.5317	Figs. 4G, S3D; Table S3D
82	0.1	post-TTX	right	2Hz + harmonics	fellow	54.1096	4.1225	Figs. 4G, S3D; Table S3D
123	0.1	post-TTX	right	2Hz + harmonics	fellow	18.8044	1.26354	Figs. 4G, S3D; Table S3D
30	0.1	pre-MD	right	control frequencies	fellow	7.21106	0.52688	Figs. 4G, S3D; Table S3D
51	0.1	post-MD / pre-TTX	right	control frequencies	fellow	12.8031	0.926099	Figs. 4G, S3D; Table S3D
59	0.1	post-MD / pre-TTX	right	control frequencies	fellow	14.4225	1.5882	Figs. 4G, S3D; Table S3D
61	0.1	during TTX	right	control frequencies	fellow	15.0992	1.24196	Figs. 4G, S3D; Table S3D
64	0.1	between TTX	right	control frequencies	fellow	13.2549	1.00832	Figs. 4G, S3D; Table S3D
67	0.1	between TTX	right	control frequencies	fellow	13.3575	0.567791	Figs. 4G, S3D; Table S3D
69	0.1	during TTX	right	control frequencies	fellow	15.4264	1.25276	Figs. 4G, S3D; Table S3D
71	0.1	during TTX	right	control frequencies	fellow	13.0507	0.649685	Figs. 4G, S3D; Table S3D
73	0.1	during TTX	right	control frequencies	fellow	14.8983	1.13677	Figs. 4G, S3D; Table S3D
75	0.1	during TTX	right	control frequencies	fellow	14.2864	2.18662	Figs. 4G, S3D; Table S3D
82	0.1	post-TTX	right	control frequencies	fellow	12.7418	1.20802	Figs. 4G, S3D; Table S3D
123	0.1	post-TTX	right	control frequencies	fellow	9.84433	1.29494	Figs. 4G, S3D; Table S3D
30	0.5	pre-MD	right	2Hz + harmonics	deprived	8.98787	1.03899	Table S3D
51	0.5	post-MD / pre-TTX	right	2Hz + harmonics	deprived	16.898	1.38671	Table S3D
59	0.5	post-MD / pre-TTX	right	2Hz + harmonics	deprived	21.0612	4.02122	Table S3D
61	0.5	during TTX	right	2Hz + harmonics	deprived	46.2083	2.22933	Table S3D
64	0.5	between TTX	right	2Hz + harmonics	deprived	25.4025	3.25619	Table S3D
67	0.5	between TTX	right	2Hz + harmonics	deprived	27.2938	2.93528	Table S3D
69	0.5	during TTX	right	2Hz + harmonics	deprived	44.4817	4.71016	Table S3D
71	0.5	during TTX	right	2Hz + harmonics	deprived	26.8508	3.75577	Table S3D
73	0.5	during TTX	right	2Hz + harmonics	deprived	36.4659	6.25618	Table S3D
75	0.5	during TTX	right	2Hz + harmonics	deprived	38.1072	3.82045	Table S3D
82	0.5	post-TTX	right	2Hz + harmonics	deprived	40.3591	2.26985	Table S3D
123	0.5	post-TTX	right	2Hz + harmonics	deprived	14.7943	1.33415	Table S3D
30	0.5	pre-MD	right	control frequencies	deprived	6.72151	0.675674	Table S3D
51	0.5	post-MD / pre-TTX	right	control frequencies	deprived	13.1887	1.12738	Table S3D
59	0.5	post-MD / pre-TTX	right	control frequencies	deprived	14.8851	2.00684	Table S3D
61	0.5	during TTX	right	control frequencies	deprived	13.4683	1.27839	Table S3D
64	0.5	between TTX	right	control frequencies	deprived	14.8058	1.08207	Table S3D
67	0.5	between TTX	right	control frequencies	deprived	12.6456	0.806768	Table S3D
69	0.5	during TTX	right	control frequencies	deprived	15.0186	1.2467	Table S3D
71	0.5	during TTX	right	control frequencies	deprived	12.4489	0.790283	Table S3D
73	0.5	during TTX	right	control frequencies	deprived	13.1322	1.53816	Table S3D
75	0.5	during TTX	right	control frequencies	deprived	12.9486	0.45822	Table S3D
82	0.5	post-TTX	right	control frequencies	deprived	13.2066	0.893144	Table S3D
123	0.5	post-TTX	right	control frequencies	deprived	10.6972	1.08486	Table S3D
30	0.5	pre-MD	right	2Hz + harmonics	fellow	9.85104	0.797493	Table S3D
51	0.5	post-MD / pre-TTX	right	2Hz + harmonics	fellow	44.6894	3.39812	Table S3D
59	0.5	post-MD / pre-TTX	right	2Hz + harmonics	fellow	47.4949	5.17856	Table S3D
61	0.5	during TTX	right	2Hz + harmonics	fellow	15.0078	1.16245	Table S3D
64	0.5	between TTX	right	2Hz + harmonics	fellow	54.2104	2.8741	Table S3D
67	0.5	between TTX	right	2Hz + harmonics	fellow	49.6207	1.97632	Table S3D
69	0.5	during TTX	right	2Hz + harmonics	fellow	15.3626	1.25122	Table S3D
71	0.5	during TTX	right	2Hz + harmonics	fellow	13.552	0.808396	Table S3D
73	0.5	during TTX	right	2Hz + harmonics	fellow	13.8016	0.889932	Table S3D
75	0.5	during TTX	right	2Hz + harmonics	fellow	12.7527	1.73087	Table S3D
82	0.5	post-TTX	right	2Hz + harmonics	fellow	37.7556	1.85302	Table S3D
123	0.5	post-TTX	right	2Hz + harmonics	fellow	13.7431	1.42481	Table S3D
30	0.5	pre-MD	right	control frequencies	fellow	6.12064	0.289241	Table S3D
51	0.5	post-MD / pre-TTX	right	control frequencies	fellow	13.1492	0.86766	Table S3D
59	0.5	post-MD / pre-TTX	right	control frequencies	fellow	15.4456	1.07016	Table S3D
61	0.5	during TTX	right	control frequencies	fellow	14.2193	0.988762	Table S3D
64	0.5	between TTX	right	control frequencies	fellow	12.8628	0.940423	Table S3D
67	0.5	between TTX	right	control frequencies	fellow	13.6871	1.25151	Table S3D
69	0.5	during TTX	right	control frequencies	fellow	17.2552	1.07646	Table S3D
71	0.5	during TTX	right	control frequencies	fellow	13.726	0.781187	Table S3D
73	0.5	during TTX	right	control frequencies	fellow	13.6886	1.30948	Table S3D
75	0.5	during TTX	right	control frequencies	fellow	13.0516	1.7736	Table S3D
82	0.5	post-TTX	right	control frequencies	fellow	12.7242	0.979265	Table S3D
123	0.5	post-TTX	right	control frequencies	fellow	9.6013	0.67645	Table S3D
30	grey	pre-MD	right	2Hz + harmonics	deprived	7.08292	0.447573	Table S3D
51	grey	post-MD / pre-TTX	right	2Hz + harmonics	deprived	13.5814	1.16291	Table S3D
59	grey	post-MD / pre-TTX	right	2Hz + harmonics	deprived	15.6029	1.45219	Table S3D
61	grey	during TTX	right	2Hz + harmonics	deprived	14.8761	1.1419	Table S3D
64	grey	between TTX	right	2Hz + harmonics	deprived	14.7716	0.807436	Table S3D
67	grey	between TTX	right	2Hz + harmonics	deprived	12.9651	0.76893	Table S3D
69	grey	during TTX	right	2Hz + harmonics	deprived	14.1356	1.35877	Table S3D
71	grey	during TTX	right	2Hz + harmonics	deprived	14.973	1.52515	Table S3D
73	grey	during TTX	right	2Hz + harmonics	deprived	17.5573	1.28052	Table S3D
75	grey	during TTX	right	2Hz + harmonics	deprived	15.3055	1.4161	Table S3D
82	grey	post-TTX	right	2Hz + harmonics	deprived	12.9657	0.415183	Table S3D
123	grey	post-TTX	right	2Hz + harmonics	deprived	12.1347	0.738936	Table S3D
30	grey	pre-MD	right	control frequencies	deprived	5.75505	0.530363	Table S3D
51	grey	post-MD / pre-TTX	right	control frequencies	deprived	13.2144	0.845609	Table S3D
59	grey	post-MD / pre-TTX	right	control frequencies	deprived	15.1562	0.623957	Table S3D
61	grey	during TTX	right	control frequencies	deprived	15.409	0.715178	Table S3D
64	grey	between TTX	right	control frequencies	deprived	14.7447	1.33794	Table S3D
67	grey	between TTX	right	control frequencies	deprived	13.3214	0.678524	Table S3D
69	grey	during TTX	right	control frequencies	deprived	14.6315	0.53699	Table S3D
71	grey	during TTX	right	control frequencies	deprived	12.7016	1.03266	Table S3D
73	grey	during TTX	right	control frequencies	deprived	12.922	1.19865	Table S3D
75	grey	during TTX	right	control frequencies	deprived	11.9612	1.12526	Table S3D
82	grey	post-TTX	right	control frequencies	deprived	11.2331	0.990365	Table S3D
123	grey	post-TTX	right	control frequencies	deprived	10.8106	0.829187	Table S3D
30	grey	pre-MD	right	2Hz + harmonics	fellow	8.2086	0.530012	Table S3D
51	grey	post-MD / pre-TTX	right	2Hz + harmonics	fellow	14.7966	1.10651	Table S3D
59	grey	post-MD / pre-TTX	right	2Hz + harmonics	fellow	14.8849	1.2217	Table S3D
61	grey	during TTX	right	2Hz + harmonics	fellow	15.086	0.868702	Table S3D
64	grey	between TTX	right	2Hz + harmonics	fellow	15.0107	0.931731	Table S3D
67	grey	between TTX	right	2Hz + harmonics	fellow	14.0778	1.4264	Table S3D
69	grey	during TTX	right	2Hz + harmonics	fellow	15.55	1.62191	Table S3D
71	grey	during TTX	right	2Hz + harmonics	fellow	15.2962	0.986005	Table S3D
73	grey	during TTX	right	2Hz + harmonics	fellow	13.0192	0.520645	Table S3D
75	grey	during TTX	right	2Hz + harmonics	fellow	11.8765	0.661932	Table S3D
82	grey	post-TTX	right	2Hz + harmonics	fellow	16.5195	0.809246	Table S3D
123	grey	post-TTX	right	2Hz + harmonics	fellow	9.97749	0.95263	Table S3D
30	grey	pre-MD	right	control frequencies	fellow	7.46349	0.664391	Table S3D
51	grey	post-MD / pre-TTX	right	control frequencies	fellow	10.6476	0.77518	Table S3D
59	grey	post-MD / pre-TTX	right	control frequencies	fellow	15.1804	1.88058	Table S3D
61	grey	during TTX	right	control frequencies	fellow	14.8698	0.881272	Table S3D
64	grey	between TTX	right	control frequencies	fellow	14.4386	1.05839	Table S3D
67	grey	between TTX	right	control frequencies	fellow	13.6582	1.0917	Table S3D
69	grey	during TTX	right	control frequencies	fellow	16.6994	1.09067	Table S3D
71	grey	during TTX	right	control frequencies	fellow	14.3797	1.3451	Table S3D
73	grey	during TTX	right	control frequencies	fellow	12.8475	1.47337	Table S3D
75	grey	during TTX	right	control frequencies	fellow	10.4101	1.20387	Table S3D
82	grey	post-TTX	right	control frequencies	fellow	12.1341	0.95236	Table S3D
123	grey	post-TTX	right	control frequencies	fellow	9.58896	1.22979	Table S3D
30	0.05	pre-MD	left	2Hz + harmonics	deprived	38.7203	1.61063	Table S3D
51	0.05	post-MD / pre-TTX	left	2Hz + harmonics	deprived	30.4689	2.6194	Table S3D
59	0.05	post-MD / pre-TTX	left	2Hz + harmonics	deprived	53.1957	1.99111	Table S3D
61	0.05	during TTX	left	2Hz + harmonics	deprived	71.0329	2.91224	Table S3D
64	0.05	between TTX	left	2Hz + harmonics	deprived	62.0872	4.11725	Table S3D
67	0.05	between TTX	left	2Hz + harmonics	deprived	59.2443	2.10897	Table S3D
69	0.05	during TTX	left	2Hz + harmonics	deprived	64.4679	7.18537	Table S3D
71	0.05	during TTX	left	2Hz + harmonics	deprived	53.4378	2.51729	Table S3D
73	0.05	during TTX	left	2Hz + harmonics	deprived	81.817	5.44055	Table S3D
75	0.05	during TTX	left	2Hz + harmonics	deprived	67.7929	1.18091	Table S3D
82	0.05	post-TTX	left	2Hz + harmonics	deprived	48.3921	1.8736	Table S3D
123	0.05	post-TTX	left	2Hz + harmonics	deprived	20.3566	1.18409	Table S3D
30	0.05	pre-MD	left	control frequencies	deprived	7.41119	0.58296	Table S3D
51	0.05	post-MD / pre-TTX	left	control frequencies	deprived	13.3987	0.856762	Table S3D
59	0.05	post-MD / pre-TTX	left	control frequencies	deprived	15.2048	2.10224	Table S3D
61	0.05	during TTX	left	control frequencies	deprived	14.6423	0.73882	Table S3D
64	0.05	between TTX	left	control frequencies	deprived	15.7748	1.35402	Table S3D
67	0.05	between TTX	left	control frequencies	deprived	12.9103	1.02363	Table S3D
69	0.05	during TTX	left	control frequencies	deprived	12.7669	1.38489	Table S3D
71	0.05	during TTX	left	control frequencies	deprived	11.6844	1.12309	Table S3D
73	0.05	during TTX	left	control frequencies	deprived	13.331	1.31808	Table S3D
75	0.05	during TTX	left	control frequencies	deprived	13.8456	0.708599	Table S3D
82	0.05	post-TTX	left	control frequencies	deprived	12.899	1.38734	Table S3D
123	0.05	post-TTX	left	control frequencies	deprived	10.7368	0.854448	Table S3D
30	0.05	pre-MD	left	2Hz + harmonics	fellow	43.4645	1.51438	Table S3D
51	0.05	post-MD / pre-TTX	left	2Hz + harmonics	fellow	90.7116	2.5235	Table S3D
59	0.05	post-MD / pre-TTX	left	2Hz + harmonics	fellow	94.1675	1.73441	Table S3D
61	0.05	during TTX	left	2Hz + harmonics	fellow	15.2453	14.8176	Table S3D
64	0.05	between TTX	left	2Hz + harmonics	fellow	81.6698	2.67632	Table S3D
67	0.05	between TTX	left	2Hz + harmonics	fellow	75.8965	2.61353	Table S3D
69	0.05	during TTX	left	2Hz + harmonics	fellow	16.7428	1.12839	Table S3D
71	0.05	during TTX	left	2Hz + harmonics	fellow	15.5305	1.37958	Table S3D
73	0.05	during TTX	left	2Hz + harmonics	fellow	17.2483	3.36676	Table S3D
75	0.05	during TTX	left	2Hz + harmonics	fellow	14.7449	2.05978	Table S3D
82	0.05	post-TTX	left	2Hz + harmonics	fellow	51.6978	2.08551	Table S3D
123	0.05	post-TTX	left	2Hz + harmonics	fellow	19.0029	0.901578	Table S3D
30	0.05	pre-MD	left	control frequencies	fellow	7.86989	0.848325	Table S3D
51	0.05	post-MD / pre-TTX	left	control frequencies	fellow	12.9603	0.570513	Table S3D
59	0.05	post-MD / pre-TTX	left	control frequencies	fellow	14.9949	1.13922	Table S3D
61	0.05	during TTX	left	control frequencies	fellow	1.04384	0.954522	Table S3D
64	0.05	between TTX	left	control frequencies	fellow	13.1396	1.52792	Table S3D
67	0.05	between TTX	left	control frequencies	fellow	12.3548	0.827534	Table S3D
69	0.05	during TTX	left	control frequencies	fellow	15.1486	1.20261	Table S3D
71	0.05	during TTX	left	control frequencies	fellow	12.0379	0.643532	Table S3D
73	0.05	during TTX	left	control frequencies	fellow	15.6836	1.17902	Table S3D
75	0.05	during TTX	left	control frequencies	fellow	12.138	1.35564	Table S3D
82	0.05	post-TTX	left	control frequencies	fellow	11.1764	0.834756	Table S3D
123	0.05	post-TTX	left	control frequencies	fellow	9.8167	0.881811	Table S3D
30	0.1	pre-MD	left	2Hz + harmonics	deprived	38.8686	2.26635	Figs. 4G, S3D; Table S3D
51	0.1	post-MD / pre-TTX	left	2Hz + harmonics	deprived	24.7209	2.74631	Figs. 4G, S3D; Table S3D
59	0.1	post-MD / pre-TTX	left	2Hz + harmonics	deprived	46.9757	1.89767	Figs. 4G, S3D; Table S3D
61	0.1	during TTX	left	2Hz + harmonics	deprived	69.8845	3.5774	Figs. 4G, S3D; Table S3D
64	0.1	between TTX	left	2Hz + harmonics	deprived	60.3253	2.94062	Figs. 4G, S3D; Table S3D
67	0.1	between TTX	left	2Hz + harmonics	deprived	58.9585	1.80704	Figs. 4G, S3D; Table S3D
69	0.1	during TTX	left	2Hz + harmonics	deprived	60.3369	7.81598	Figs. 4G, S3D; Table S3D
71	0.1	during TTX	left	2Hz + harmonics	deprived	54.7307	3.24823	Figs. 4G, S3D; Table S3D
73	0.1	during TTX	left	2Hz + harmonics	deprived	70.0394	4.74399	Figs. 4G, S3D; Table S3D
75	0.1	during TTX	left	2Hz + harmonics	deprived	68.1828	4.04349	Figs. 4G, S3D; Table S3D
82	0.1	post-TTX	left	2Hz + harmonics	deprived	40.9554	2.3322	Figs. 4G, S3D; Table S3D
123	0.1	post-TTX	left	2Hz + harmonics	deprived	20.077	2.01813	Figs. 4G, S3D; Table S3D
30	0.1	pre-MD	left	control frequencies	deprived	7.35756	0.740367	Figs. 4G, S3D; Table S3D
51	0.1	post-MD / pre-TTX	left	control frequencies	deprived	11.9474	0.63509	Figs. 4G, S3D; Table S3D
59	0.1	post-MD / pre-TTX	left	control frequencies	deprived	14.6832	0.809225	Figs. 4G, S3D; Table S3D
61	0.1	during TTX	left	control frequencies	deprived	13.9186	1.14177	Figs. 4G, S3D; Table S3D
64	0.1	between TTX	left	control frequencies	deprived	14.33	0.993736	Figs. 4G, S3D; Table S3D
67	0.1	between TTX	left	control frequencies	deprived	13.0567	0.875619	Figs. 4G, S3D; Table S3D
69	0.1	during TTX	left	control frequencies	deprived	13.5134	0.6936	Figs. 4G, S3D; Table S3D
71	0.1	during TTX	left	control frequencies	deprived	14.3061	1.19379	Figs. 4G, S3D; Table S3D
73	0.1	during TTX	left	control frequencies	deprived	13.4551	0.555321	Figs. 4G, S3D; Table S3D
75	0.1	during TTX	left	control frequencies	deprived	14.9689	1.04218	Figs. 4G, S3D; Table S3D
82	0.1	post-TTX	left	control frequencies	deprived	10.5632	0.622411	Figs. 4G, S3D; Table S3D
123	0.1	post-TTX	left	control frequencies	deprived	10.694	0.617298	Figs. 4G, S3D; Table S3D
30	0.1	pre-MD	left	2Hz + harmonics	fellow	41.1915	1.45022	Figs. 4G, S3D; Table S3D
51	0.1	post-MD / pre-TTX	left	2Hz + harmonics	fellow	85.2177	2.9998	Figs. 4G, S3D; Table S3D
59	0.1	post-MD / pre-TTX	left	2Hz + harmonics	fellow	80.0444	4.8203	Figs. 4G, S3D; Table S3D
61	0.1	during TTX	left	2Hz + harmonics	fellow	14.8838	13.9894	Figs. 4G, S3D; Table S3D
64	0.1	between TTX	left	2Hz + harmonics	fellow	76.9628	3.27006	Figs. 4G, S3D; Table S3D
67	0.1	between TTX	left	2Hz + harmonics	fellow	70.3995	2.68764	Figs. 4G, S3D; Table S3D
69	0.1	during TTX	left	2Hz + harmonics	fellow	16.4651	1.45289	Figs. 4G, S3D; Table S3D
71	0.1	during TTX	left	2Hz + harmonics	fellow	13.7713	1.04946	Figs. 4G, S3D; Table S3D
73	0.1	during TTX	left	2Hz + harmonics	fellow	15.3772	1.34993	Figs. 4G, S3D; Table S3D
75	0.1	during TTX	left	2Hz + harmonics	fellow	13.2738	1.47392	Figs. 4G, S3D; Table S3D
82	0.1	post-TTX	left	2Hz + harmonics	fellow	39.5987	3.17349	Figs. 4G, S3D; Table S3D
123	0.1	post-TTX	left	2Hz + harmonics	fellow	19.1664	1.32628	Figs. 4G, S3D; Table S3D
30	0.1	pre-MD	left	control frequencies	fellow	7.56076	0.843784	Figs. 4G, S3D; Table S3D
51	0.1	post-MD / pre-TTX	left	control frequencies	fellow	13.0044	0.994941	Figs. 4G, S3D; Table S3D
59	0.1	post-MD / pre-TTX	left	control frequencies	fellow	15.1445	1.1409	Figs. 4G, S3D; Table S3D
61	0.1	during TTX	left	control frequencies	fellow	0.949167	1.21324	Figs. 4G, S3D; Table S3D
64	0.1	between TTX	left	control frequencies	fellow	11.8653	0.928438	Figs. 4G, S3D; Table S3D
67	0.1	between TTX	left	control frequencies	fellow	12.9729	0.51543	Figs. 4G, S3D; Table S3D
69	0.1	during TTX	left	control frequencies	fellow	16.0869	1.25788	Figs. 4G, S3D; Table S3D
71	0.1	during TTX	left	control frequencies	fellow	13.1664	0.682508	Figs. 4G, S3D; Table S3D
73	0.1	during TTX	left	control frequencies	fellow	14.114	1.04777	Figs. 4G, S3D; Table S3D
75	0.1	during TTX	left	control frequencies	fellow	13.4411	1.95181	Figs. 4G, S3D; Table S3D
82	0.1	post-TTX	left	control frequencies	fellow	12.7146	1.16369	Figs. 4G, S3D; Table S3D
123	0.1	post-TTX	left	control frequencies	fellow	9.83411	1.28254	Figs. 4G, S3D; Table S3D
30	0.5	pre-MD	left	2Hz + harmonics	deprived	7.19385	0.719237	Table S3D
51	0.5	post-MD / pre-TTX	left	2Hz + harmonics	deprived	17.6961	1.58736	Table S3D
59	0.5	post-MD / pre-TTX	left	2Hz + harmonics	deprived	22.0126	4.69726	Table S3D
61	0.5	during TTX	left	2Hz + harmonics	deprived	41.1223	2.28123	Table S3D
64	0.5	between TTX	left	2Hz + harmonics	deprived	27.2972	4.06694	Table S3D
67	0.5	between TTX	left	2Hz + harmonics	deprived	28.9544	2.8704	Table S3D
69	0.5	during TTX	left	2Hz + harmonics	deprived	40.5084	4.6633	Table S3D
71	0.5	during TTX	left	2Hz + harmonics	deprived	24.6986	3.35085	Table S3D
73	0.5	during TTX	left	2Hz + harmonics	deprived	34.7439	5.48318	Table S3D
75	0.5	during TTX	left	2Hz + harmonics	deprived	35.6458	3.8134	Table S3D
82	0.5	post-TTX	left	2Hz + harmonics	deprived	32.2523	1.86644	Table S3D
123	0.5	post-TTX	left	2Hz + harmonics	deprived	14.9258	1.32004	Table S3D
30	0.5	pre-MD	left	control frequencies	deprived	6.27936	0.606147	Table S3D
51	0.5	post-MD / pre-TTX	left	control frequencies	deprived	13.1858	1.04547	Table S3D
59	0.5	post-MD / pre-TTX	left	control frequencies	deprived	14.7284	2.08155	Table S3D
61	0.5	during TTX	left	control frequencies	deprived	12.7245	0.987127	Table S3D
64	0.5	between TTX	left	control frequencies	deprived	15.3941	0.70676	Table S3D
67	0.5	between TTX	left	control frequencies	deprived	13.0597	0.887985	Table S3D
69	0.5	during TTX	left	control frequencies	deprived	14.096	1.66822	Table S3D
71	0.5	during TTX	left	control frequencies	deprived	12.4626	0.863208	Table S3D
73	0.5	during TTX	left	control frequencies	deprived	13.0522	1.40054	Table S3D
75	0.5	during TTX	left	control frequencies	deprived	11.9879	0.365483	Table S3D
82	0.5	post-TTX	left	control frequencies	deprived	12.287	0.703594	Table S3D
123	0.5	post-TTX	left	control frequencies	deprived	10.7202	1.11047	Table S3D
30	0.5	pre-MD	left	2Hz + harmonics	fellow	8.43165	1.43365	Table S3D
51	0.5	post-MD / pre-TTX	left	2Hz + harmonics	fellow	49.7438	3.57429	Table S3D
59	0.5	post-MD / pre-TTX	left	2Hz + harmonics	fellow	48.8222	4.94125	Table S3D
61	0.5	during TTX	left	2Hz + harmonics	fellow	14.0052	13.4605	Table S3D
64	0.5	between TTX	left	2Hz + harmonics	fellow	53.7163	2.93251	Table S3D
67	0.5	between TTX	left	2Hz + harmonics	fellow	45.748	1.53894	Table S3D
69	0.5	during TTX	left	2Hz + harmonics	fellow	15.6858	1.39875	Table S3D
71	0.5	during TTX	left	2Hz + harmonics	fellow	13.2168	0.642813	Table S3D
73	0.5	during TTX	left	2Hz + harmonics	fellow	14.5906	1.31747	Table S3D
75	0.5	during TTX	left	2Hz + harmonics	fellow	12.4222	1.33775	Table S3D
82	0.5	post-TTX	left	2Hz + harmonics	fellow	28.1389	1.89653	Table S3D
123	0.5	post-TTX	left	2Hz + harmonics	fellow	13.9857	1.45168	Table S3D
30	0.5	pre-MD	left	control frequencies	fellow	5.80691	0.595009	Table S3D
51	0.5	post-MD / pre-TTX	left	control frequencies	fellow	13.3771	0.803482	Table S3D
59	0.5	post-MD / pre-TTX	left	control frequencies	fellow	16.0305	1.10576	Table S3D
61	0.5	during TTX	left	control frequencies	fellow	1.11748	0.894233	Table S3D
64	0.5	between TTX	left	control frequencies	fellow	12.3558	0.895559	Table S3D
67	0.5	between TTX	left	control frequencies	fellow	13.0556	1.1039	Table S3D
69	0.5	during TTX	left	control frequencies	fellow	17.3841	0.892077	Table S3D
71	0.5	during TTX	left	control frequencies	fellow	13.5766	0.967448	Table S3D
73	0.5	during TTX	left	control frequencies	fellow	12.2931	1.17456	Table S3D
75	0.5	during TTX	left	control frequencies	fellow	12.7806	1.56722	Table S3D
82	0.5	post-TTX	left	control frequencies	fellow	10.99	0.795804	Table S3D
123	0.5	post-TTX	left	control frequencies	fellow	9.4965	0.588529	Table S3D
30	grey	pre-MD	left	2Hz + harmonics	deprived	7.711	0.461665	Table S3D
51	grey	post-MD / pre-TTX	left	2Hz + harmonics	deprived	13.7621	1.18104	Table S3D
59	grey	post-MD / pre-TTX	left	2Hz + harmonics	deprived	15.1726	1.35503	Table S3D
61	grey	during TTX	left	2Hz + harmonics	deprived	14.059	1.26443	Table S3D
64	grey	between TTX	left	2Hz + harmonics	deprived	14.2278	0.944431	Table S3D
67	grey	between TTX	left	2Hz + harmonics	deprived	12.7789	0.822299	Table S3D
69	grey	during TTX	left	2Hz + harmonics	deprived	13.1529	0.786506	Table S3D
71	grey	during TTX	left	2Hz + harmonics	deprived	14.3997	1.5611	Table S3D
73	grey	during TTX	left	2Hz + harmonics	deprived	16.2247	1.66511	Table S3D
75	grey	during TTX	left	2Hz + harmonics	deprived	15.4088	1.32515	Table S3D
82	grey	post-TTX	left	2Hz + harmonics	deprived	12.4107	0.59259	Table S3D
123	grey	post-TTX	left	2Hz + harmonics	deprived	12.118	0.762423	Table S3D
30	grey	pre-MD	left	control frequencies	deprived	6.5569	0.695508	Table S3D
51	grey	post-MD / pre-TTX	left	control frequencies	deprived	13.3747	0.902104	Table S3D
59	grey	post-MD / pre-TTX	left	control frequencies	deprived	14.9809	0.73605	Table S3D
61	grey	during TTX	left	control frequencies	deprived	13.9235	0.652023	Table S3D
64	grey	between TTX	left	control frequencies	deprived	14.6523	1.29392	Table S3D
67	grey	between TTX	left	control frequencies	deprived	13.1866	0.685766	Table S3D
69	grey	during TTX	left	control frequencies	deprived	13.7932	1.07087	Table S3D
71	grey	during TTX	left	control frequencies	deprived	12.6456	1.01521	Table S3D
73	grey	during TTX	left	control frequencies	deprived	13.2723	1.22355	Table S3D
75	grey	during TTX	left	control frequencies	deprived	11.4654	0.918867	Table S3D
82	grey	post-TTX	left	control frequencies	deprived	10.3123	0.765988	Table S3D
123	grey	post-TTX	left	control frequencies	deprived	10.8354	0.767803	Table S3D
30	grey	pre-MD	left	2Hz + harmonics	fellow	7.9044	0.714998	Table S3D
51	grey	post-MD / pre-TTX	left	2Hz + harmonics	fellow	15.3878	1.16042	Table S3D
59	grey	post-MD / pre-TTX	left	2Hz + harmonics	fellow	15.7131	1.44168	Table S3D
61	grey	during TTX	left	2Hz + harmonics	fellow	14.8259	13.3969	Table S3D
64	grey	between TTX	left	2Hz + harmonics	fellow	13.7265	1.12123	Table S3D
67	grey	between TTX	left	2Hz + harmonics	fellow	14.3057	1.51335	Table S3D
69	grey	during TTX	left	2Hz + harmonics	fellow	15.9092	2.28004	Table S3D
71	grey	during TTX	left	2Hz + harmonics	fellow	14.7528	1.00629	Table S3D
73	grey	during TTX	left	2Hz + harmonics	fellow	13.3754	1.02628	Table S3D
75	grey	during TTX	left	2Hz + harmonics	fellow	11.326	0.774832	Table S3D
82	grey	post-TTX	left	2Hz + harmonics	fellow	15.1537	0.994767	Table S3D
123	grey	post-TTX	left	2Hz + harmonics	fellow	10.0887	0.93569	Table S3D
30	grey	pre-MD	left	control frequencies	fellow	7.30182	0.784487	Table S3D
51	grey	post-MD / pre-TTX	left	control frequencies	fellow	10.7078	0.706617	Table S3D
59	grey	post-MD / pre-TTX	left	control frequencies	fellow	14.1872	2.1068	Table S3D
61	grey	during TTX	left	control frequencies	fellow	0.946098	0.910842	Table S3D
64	grey	between TTX	left	control frequencies	fellow	13.6307	1.06322	Table S3D
67	grey	between TTX	left	control frequencies	fellow	13.6077	1.08519	Table S3D
69	grey	during TTX	left	control frequencies	fellow	16.6606	1.42193	Table S3D
71	grey	during TTX	left	control frequencies	fellow	14.1633	1.52785	Table S3D
73	grey	during TTX	left	control frequencies	fellow	13.6905	1.88659	Table S3D
75	grey	during TTX	left	control frequencies	fellow	9.16068	1.14276	Table S3D
82	grey	post-TTX	left	control frequencies	fellow	11.7015	0.832175	Table S3D
123	grey	post-TTX	left	control frequencies	fellow	9.84883	1.07115	Table S3D
